# Supplementary material for: Use of biologics during pregnancy and risk of serious infections in the mother and baby: a Canadian population-based cohort study
Source: PubMed Central journal article supplement — BMJ Open. 2019 Feb 20;9(2):e023714. doi: 10.1136/bmjopen-2018-023714 (PMC6398640; doi:10.1136/bmjopen-2018-023714), 2019-02-20
Supplement: bmjopen-2018-023714.draft_revisions.pdf [file bmjopen-2018-023714.draft_revisions.pdf]

# BMJ Open

BMJ Open is committed to open peer review. As part of this commitment we make the peer review history of every article we publish publicly available.

When an article is published we post the peer reviewers' comments and the authors' responses online. We also post the versions of the paper that were used during peer review. These are the versions that the peer review comments apply to.

The versions of the paper that follow are the versions that were submitted during the peer review process. They are not the versions of record or the final published versions. They should not be cited or distributed as the published version of this manuscript.

BMJ Open is an open access journal and the full, final, typeset and author-corrected version of record of the manuscript is available on our site with no access controls, subscription charges or pay-per-view fees (<http://bmjopen.bmj.com>).

If you have any questions on BMJ Open's open peer review process please email [info.bmjopen@bmj.com](mailto:info.bmjopen@bmj.com)

# BMJ Open

## Use of biologics during pregnancy and risk of serious infections in the mother and baby: A population-based cohort study

|                               |                                                                                                                                                                                                                                                                                                                                                                                                                                                                                                                                                                                  |
|-------------------------------|----------------------------------------------------------------------------------------------------------------------------------------------------------------------------------------------------------------------------------------------------------------------------------------------------------------------------------------------------------------------------------------------------------------------------------------------------------------------------------------------------------------------------------------------------------------------------------|
| Journal:                      | <i>BMJ Open</i>                                                                                                                                                                                                                                                                                                                                                                                                                                                                                                                                                                  |
| Manuscript ID                 | bmjopen-2018-023714                                                                                                                                                                                                                                                                                                                                                                                                                                                                                                                                                              |
| Article Type:                 | Research                                                                                                                                                                                                                                                                                                                                                                                                                                                                                                                                                                         |
| Date Submitted by the Author: | 20-Apr-2018                                                                                                                                                                                                                                                                                                                                                                                                                                                                                                                                                                      |
| Complete List of Authors:     | Tsao, Nicole; University of British Columbia, Faculty of Pharmaceutical Sciences; Arthritis Research Canada, Lynd, Larry; University of British Columbia, Faculty of Pharmaceutical Sciences; Centre for Health Evaluation and Outcomes Sciences Sadatsafavi, Mohsen; University of British Columbia, Faculty of Pharmaceutical Sciences; Centre for Clinical Epidemiology and Evaluation Hanley, Gillian; University of British Columbia, Obstetrics & Gynaecology De Vera, MA ; University of British Columbia, Faculty of Pharmaceutical Sciences; Arthritis Research Canada, |
| Keywords:                     | Adverse events < THERAPEUTICS, RHEUMATOLOGY, Inflammatory bowel disease < GASTROENTEROLOGY, EPIDEMIOLOGY                                                                                                                                                                                                                                                                                                                                                                                                                                                                         |
|                               |                                                                                                                                                                                                                                                                                                                                                                                                                                                                                                                                                                                  |

SCHOLARONE™  
Manuscripts

Peer Review Only

1  
2  
3 **Use of biologics during pregnancy and risk of serious infections in the mother and baby: A**  
4  
5 **population-based cohort study**  
6  
7

8 **Authors:** Nicole W. Tsao, Larry D. Lynd, Mohsen Sadatsafavi, Gillian Hanley, Mary A. De Vera  
9

10 Nicole W Tsao PhD candidate, Faculty of Pharmaceutical Sciences University of British Columbia,  
11

12 Vancouver, Canada, V6T 1Z3, Larry D Lynd Professor, Faculty of Pharmaceutical Sciences  
13

14 University of British Columbia, Vancouver, Canada, V6T 1Z3, Gillian Hanley Assistant Professor,  
15

16 Faculty of Medicine, Department of Obstetrics & Gynecology, University of British Columbia,  
17

18 Vancouver, Canada, V6Z 2K5, Mohsen Sadatsafavi Assistant Professor, Faculty of Pharmaceutical  
19

20 Sciences University of British Columbia, Vancouver, Canada, V6T 1Z3, Mary A De Vera Assistant  
21

22 Professor, Faculty of Pharmaceutical Sciences University of British Columbia, Vancouver, Canada,  
23

24 V6T 1Z3  
25  
26  
27  
28

29 **Corresponding author:**  
30

31 Mary A. De Vera, PhD  
32

33 University of British Columbia Faculty of Pharmaceutical Sciences  
34

35 2405 Wesbrook Mall  
36

37 Vancouver, BC, V6T 1Z3  
38

39 Tel: 604-221-8767; Email: [mdevera@mail.ubc.ca](mailto:mdevera@mail.ubc.ca)  
40  
41  
42

43 **Key words:** biologics, pregnancy, infants, infections, autoimmune diseases  
44  
45  
46  
47

48 **Manuscript word count: 3234**  
49  
50  
51  
52  
53  
54  
55  
56  
57  
58  
59  
60

1  
2  
3 **Titles, funding, and grant support:**  
4

5 Ms. Tsao is a PhD Candidate and Canadian Institutes of Health Research Fellowship  
6 holder.  
7

8  
9  
10 Dr. Lynd is a Professor, and Director of Collaboration for Outcomes Research and  
11 Evaluation.  
12

13  
14  
15 Dr. Sadatsafavi is an Assistant Professor, Canadian Institutes of Health Research  
16 New Investigator, and Michael Smith Foundation for Health Research Scholar  
17

18  
19  
20 Dr. Hanley is an Assistant Professor, Canadian Institutes of Health Research New  
21 Investigator, and a recipient of Canadian Cancer Society Research Institute Capacity  
22 Development Award.  
23  
24

25  
26  
27 Dr. De Vera is an Assistant Professor, Canada Research Chair in Medication  
28 Adherence, Utilization, and Outcomes, The Arthritis Society Network Scholar, and  
29 Michael Smith Foundation for Health Research Scholar.  
30  
31

32  
33  
34 This research was funded by Arthritis Society Operating Grant (YIO-13-07) and  
35 Canadian Institutes of Health Research Operating Grant: Analyses of Existing  
36 Canadian Cohorts and Databases (AO1-151540). The funders had no part in the  
37 design, conduct, or reporting of this study.  
38  
39  
40  
41  
42  
43  
44  
45  
46  
47  
48  
49  
50  
51  
52  
53  
54  
55  
56  
57  
58  
59  
60

## Abstract

**Objectives:** To investigate the association between exposure to biologics during pregnancy and serious infections in mothers and infants.

**Design:** Retrospective cohort study

**Setting:** Population-based

**Participants:** Women with one or more autoimmune diseases identified by International Classification of Diseases 9<sup>th</sup>/10<sup>th</sup> revision codes in healthcare administrative databases in British Columbia, Canada, who had pregnancies ending in a live or still birth between January 1st, 2002 and December 31st, 2012. Women were defined as exposed if they had at least one biologic prescription during pregnancy, and infants born to these women were considered exposed in utero. Disease-matched women with no biologics prescriptions during pregnancy, and their infants, comprised the unexposed groups.

**Primary outcome measures:** Serious infections requiring hospitalization.

**Results:** Over the 10-year study period, there were 6,218 women (8,607 pregnancies) who had an autoimmune disease diagnosis; of which 90 women were exposed to biologics during pregnancy, with 100 babies born to these women. Among women exposed to biologics during pregnancy, occurrence of serious post-partum infections were low, ranging from 0 to 5%, depending on concomitant exposures to immunosuppressants. In multivariable models using logistic regression, the adjusted odds ratio (aOR) for the association of biologics exposure with serious maternal post-partum infections was 0.79 (95% confidence interval [CI] 0.24 to 2.54). In infants exposed to biologics in utero, occurrence of serious infections during the first year of life ranged from 0 to 7%, depending on concomitant exposures to immunosuppressants in utero. Multivariable models showed no association between biologics exposure in utero and serious infant infections (aOR 0.56, 95%CI 0.17 to 1.81).

1  
2  
3 **Conclusions:** These population-based data suggest that the use of biologics by women with  
4  
5 autoimmune diseases during pregnancy is not associated with an increased risk of serious infections  
6  
7 in mothers, during post-partum, or in infants during the first year of life.  
8  
9  
10  
11  
12  
13  
14  
15  
16  
17  
18  
19  
20  
21  
22  
23  
24  
25  
26  
27  
28  
29  
30  
31  
32  
33  
34  
35  
36  
37  
38  
39  
40  
41  
42  
43  
44  
45  
46  
47  
48  
49  
50  
51  
52  
53  
54  
55  
56  
57  
58  
59  
60

For peer review only

## Article Summary

### Strengths and limitations of this study

- This is the first population-based cohort study to examine the risk of serious post-partum infections in mothers who were using biologics during pregnancy, and in infants exposed in utero.
- We used individual-level, de-identified, longitudinal data on all health services (physician visits, hospitalizations, and prescription medications) covering the entire population of the province, linked with a perinatal registry covering >99% of births.
- We used high-dimensional propensity score matching as a sensitivity analysis to the traditional multivariable models.
- The data sources come from administrative databases not primarily collected for research purposes and thus rely on accuracy of diagnostic coding.
- Exposures and outcomes remain relatively rare and as such, caution should be exercised when interpreting the findings in light of this context.

## Introduction

Biologics have revolutionized the management of several autoimmune chronic conditions, and are commonly used in inflammatory arthritis including rheumatoid arthritis (RA), ankylosing spondylitis (AS), psoriatic arthritis (PsA) as well as inflammatory bowel disease (IBD, ulcerative colitis and Crohn's disease) (1,2). They are typically genetically engineered parts of, or whole, immunoglobulin Gs (IgG) that inhibit specific components of the immune system that play pivotal roles in inflammation (3). Despite their established efficacy in managing autoimmune diseases, treatment with biologics is not without risks. Network meta-analyses show a significant increase in serious infections in RA patients treated with biologics alone (odds ratio [OR] 1.31; 95% credible interval 1.09 to 1.58) or in combination with traditional disease modifying anti-rheumatic drugs (DMARDs) (OR 1.34; 95% confidence interval [CI] 1.09 to 1.69) compared to DMARDs alone (4).

In pregnancy, infection risk is a unique safety outcome in that it can occur both in the mother and her infant possibly as a result of exposure to the same offending agent. Additionally, the risk of infections may already be elevated for the mother during the delivery and post-partum periods, and for the neonate after birth when their immune system is still naïve. During pregnancy, IgG is transferred from the maternal to the fetal circulation by receptor-mediated binding of the Fc $\gamma$  portion of the IgG molecule and its receptor, FcRn (Fc receptor neonatal) (5–7). The FcRn is also found to have a protective effect on IgG degradation, extending its lifespan, leading to accumulation in the infant for upwards of six to eight months (8). With infliximab and adalimumab having higher affinity for FcRn, levels of these biologics in offspring cord blood have been reported to be 300–400% higher than levels in the maternal circulation (9). Furthermore, detectable, and even therapeutic, levels of biologics in infant serum have been confirmed in case reports of infants exposed in utero (9–11). However, to date few epidemiologic studies have examined the risk of



1  
2  
3 infections in women using biologics during pregnancy, or in infants that were exposed to biologics  
4  
5 in utero. Our objectives were to investigate the association between exposure to biologics during  
6  
7 pregnancy and serious infections in 1) mothers during the post-partum period; and 2) infants during  
8  
9 the first year of life.  
10  
11  
12  
13

## 14 **Methods**

### 15 Data sources

16  
17  
18 Data for mothers and babies were obtained through Population Data BC, a repository of individual-  
19  
20 level, de-identified, longitudinal data on all health services covering the entire population of BC  
21  
22 (estimated 4.6 million residents, December 2016 (12)). Specifically, respective data for mothers and  
23  
24 babies comprised four linked databases including: 1) Medical Services Plan (MSP) database – all  
25  
26 provincially-funded physician visits, ordered laboratory tests and diagnostic procedures (x-rays,  
27  
28 ultrasounds etc.) (13); 2) Discharge Abstract Database (DAD) – all hospital admissions and  
29  
30 discharges (14); 3) PharmaNet – a comprehensive prescription drug database that captures all  
31  
32 prescriptions dispensed in community pharmacies regardless of payment source, since 1996 (15).  
33  
34  
35 The BC Perinatal Database Registry (BCPDR) facilitated the linkage between mothers' and babies'  
36  
37 data. The BCPDR contains data abstracted from obstetrical and neonatal medical records on nearly  
38  
39 100% of births in the province of BC from over 60 acute care facilities as well as births occurring at  
40  
41 home attended by BC registered midwives, including women who had pregnancies ending in a live  
42  
43 or still birth of at least 20 weeks gestation or 500 grams birth weight, also collects data on maternal  
44  
45 postpartum readmissions up to 42 days post-delivery and baby transfers and readmissions up to 28  
46  
47 days after birth (16–19). Details of these data sources are described in previous work (20) and  
48  
49  
50  
51  
52  
53  
54  
55  
56  
57  
58  
59  
60 databases and linkages are shown in Figure 1.

### Study cohort

The source population comprised of women in BC who had pregnancies ending in a live or still birth between January 1st, 2002 and December 31st, 2012, and were continuously covered by BC's provincial health plan for at least 12 months prior to the start of pregnancy and in the 12 months following delivery. This requirement of continuous insurance coverage ensures that we have complete data capture for all women and babies in our study population. We created a cohort of women from the source population who had a recorded diagnosis of one or more autoimmune diseases that could be treated with a biologic, including RA, IBD (Crohn's disease and ulcerative colitis), psoriasis (Ps)/PsA, AS, juvenile idiopathic arthritis, and systemic autoimmune rheumatic diseases. Women were considered to have been diagnosed with one of these conditions if they had the same International Classification of Diseases (ICD)-9<sup>th</sup> revision or 10<sup>th</sup> revision codes for a specific autoimmune disease from two separate physician visits that were at least 60 days apart and within two years, any time prior to the date of conception; or, having at least one hospitalization with an ICD-9/10 code for an autoimmune disease any time prior to the date of conception (20). Given that the unit of analysis was individual pregnancy, each pregnancy had to satisfy the above criteria in order to be included in the analyses. All singleton live born infants from these pregnancies were included in the analyses of infant serious infections.

### Biologics exposure

Using dispensation dates and Canadian Drug Identity Codes for biologics in PharmaNet linked with date of conception and date of delivery of each pregnancy in the BCPDR, exposure to biologics was identified in any woman in the autoimmune disease cohort with one or more prescriptions for a biologic anytime from the date of conception to the date of delivery (20). Infants born from these pregnancies were classified as being exposed to biologics in utero. Pregnancies that did not satisfy

1  
2  
3 this criteria and infants born from those pregnancies were considered unexposed. All biologics  
4 available in BC for the treatment of autoimmune diseases of interest during the study period, along  
5 with concomitant medications considered in this study, are listed in Supplementary Table S1.  
6  
7  
8  
9  
10

### 11 Serious infections

12  
13  
14 The outcomes of interest were serious infections requiring hospitalization during the post-partum  
15 period in women, and serious infections requiring hospitalization anytime during the first year of life  
16 in infants. Serious post-partum infections were defined as any episode of hospitalization, including  
17 the delivery episode, with one or more ICD-9/10 codes for an infection anytime from the date of  
18 delivery until 42 days post-partum – the conventional definition for post-partum period of concern  
19 (21). Serious infections in infants were defined as any episode of hospitalization with one or more  
20 ICD-9/10 codes for an infection anytime during the first year of life – due to the lengthy  
21 accumulation of biologics in infant circulation – or until death, whichever occurred first. All  
22 infections considered are listed in Supplementary Table S2.  
23  
24  
25  
26  
27  
28  
29  
30  
31  
32  
33  
34  
35  
36

### 37 Covariates

38  
39 All covariates considered were from the aforementioned data sources. Maternal factors included  
40 characteristics of current pregnancy, prior obstetrical history, comorbidities, and medication use.  
41 Characteristics of current pregnancy included maternal age at delivery (continuous), parity  
42 (primiparous or multiparous), neighborhood income quintile (based on postal code) at baseline,  
43 body mass index (BMI) at first antenatal visit (continuous; and categorical as underweight: <18.5,  
44 normal: 18.5-24.9, overweight: 25-29.9, obese:  $\geq 30$  kg/m<sup>2</sup>), weight gain during pregnancy (binary,  
45 based on guidelines for weight gain during pregnancy by BMI category (22)), number of antenatal  
46 visits (continuous), and hospitalization at baseline (binary), and delivery by cesarean section (binary).  
47  
48  
49  
50  
51  
52  
53  
54  
55  
56  
57  
58  
59  
60

1  
2  
3 Prior obstetrical history included binary outcomes from previous pregnancies (if applicable)  
4 including premature delivery, spontaneous abortions, neonatal death, stillbirth, low birth weight, and  
5 congenital anomalies. Comorbidities considered included gestational hypertension, gestational  
6 diabetes, anxiety disorders, mood disorders, and asthma. Concomitant medications included  
7 DMARDs or immunosuppressants, glucocorticoids, antidepressants, anxiolytics, traditional and  
8 COX-2 non-steroidal anti-inflammatory drugs (NSAIDs). All maternal factors considered in  
9 analyses of post-partum infections in the mother that could be associated with serious infections in  
10 infants were also considered in analyses of this latter outcome in addition to infant characteristics.  
11 Infant characteristics included sex and Apgar scores at 1 minute, 5 minutes, and 10 minutes  
12 (continuous). Other infant characteristics including gestational age, birth weight, and presence of  
13 anomalies were considered but not included in the analysis as they may be possible mediators of the  
14 effect of exposure on serious infections in infants.  
15  
16  
17  
18  
19  
20  
21  
22  
23  
24  
25  
26  
27  
28  
29  
30  
31

### 32 Statistical Analysis

34 Using logistic regression models we calculated ORs with 95% CIs between maternal exposure to  
35 biologics during pregnancy and the risk of serious post-partum infections in women, and the risk of  
36 serious infant infections during the first year of life; first as unadjusted models, by treatment  
37 categories only (model 1) and then adjusted for maternal and infant characteristics according to  
38 respective outcome (model 2). Multivariable models were constructed using forward selection and  
39 covariates were included in the final models if they were associated with the exposure in bivariate  
40 analyses and resulted in lower Akaike Information Criterion upon inclusion. Multivariable regression  
41 analyses using generalized estimating equation models with logit link and clustered by mother could  
42 not be completed as models did not converge. However, previous work on a larger sample from our  
43  
44  
45  
46  
47  
48  
49  
50  
51  
52  
53  
54  
55  
56  
57  
58  
59  
60

1  
2  
3 source population showed that accounting for correlations between multiple pregnancies within the  
4 same woman did not appreciably change effect estimates and confidence intervals (20).  
5  
6  
7  
8  
9

10 As a sensitivity analysis, we estimated propensity for biologics exposure in each pregnancy using a  
11 high dimensional propensity score (HDPS) algorithm that incorporated investigator-specified  
12 covariates and additional factors that acted as proxy variables for unmeasured confounders from the  
13 four aforementioned data dimensions (model 3) (23). The HDPS was calculated using logistic  
14 regression then each biologic exposed pregnancy was matched with five unexposed pregnancies  
15 without replacement, based on HDPS. Match performance was evaluated by comparing the  
16 standardized mean differences in baseline characteristics of matched and unmatched cohorts. Odds  
17 ratios and 95% CIs for biologics exposure and serious post-partum infections, and serious infant  
18 infections were calculated using logistic regression in the HDPS-matched samples. All analyses were  
19 conducted using SAS statistical software v.9.3 (Cary, NC, USA).  
20  
21  
22  
23  
24  
25  
26  
27  
28  
29  
30  
31  
32  
33  
34

### 35 Study Conduct

36 This study was approved by the University of British Columbia, Behavioural Research Ethics Board.  
37 All inferences, opinions, and conclusions drawn in this manuscript are those of the authors, and do  
38 not reflect the opinions or policies of the data stewards. Due to data sharing agreements and  
39 confidentiality, cell sizes of less than five individuals are not reported.  
40  
41  
42  
43  
44  
45  
46  
47

### 48 Patient and Public Involvement

49 Patients were not involved in the design, recruitment, or conduct of the study as this is a  
50 retrospective cohort study using population-wide administrative data.  
51  
52  
53  
54  
55  
56  
57

## Results

In the cohort of 6,218 women with autoimmune inflammatory disease diagnoses and 8,607 singleton pregnancies, there were 90 women exposed to biologics during pregnancy, and 100 babies born to these women. In the biologics exposed group, more women had IBD or RA, used at least one DMARD or glucocorticoid delivered via Cesarean section, or had gestational diabetes, anxiety, or mood disorders; whereas in the group not exposed to biologics during pregnancy, more women had Ps/PsA, were multiparous, and had gestational hypertension (Table 1). A larger proportion of infants exposed to biologics in utero were female, and those that were unexposed to biologics tended to have more advanced gestational age and higher birth weight (Table 1).

Among women exposed to biologics during pregnancy, occurrence of serious post-partum infections were rare, ranging from 0 to 5%, depending on concomitant exposures to DMARDs or glucocorticoids (Figure 2). Serious infections that occurred in those exposed to biologics included infection of the amniotic sac and membranes, and bacterial puerperal infections. In model 1 looking only at drug exposures, we found no independent associations between the use of biologics (OR 0.88, 95%CI 0.27 to 2.82), DMARDs (OR 0.98, 95%CI 0.68 to 1.40), or glucocorticoids (OR 1.07, 95%CI 0.64 to 1.77), with the risk of serious post-partum infections (Table 2). The results were similar when maternal factors were included (model 2), specifically, the association between biologics exposure and serious post-partum infections had an adjusted OR [aOR] of 0.79 (95%CI 0.24 to 2.54), DMARD/ immunosuppressants had an aOR of 0.98 (95%CI 0.68 to 1.40), and glucocorticoids an aOR of 1.00 (95%CI 0.60 to 1.67) (Table 2). In this model, we also found several independent maternal factors that were significantly associated with either increased or decreased post-partum infections; having an anxiety diagnosis, more previous hospitalizations, higher BMI at conception, and delivering via Cesarean section were all factors that increased the risk of serious

1  
2  
3 infection; while being multiparous appeared protective. Results from sensitivity analysis using  
4 HDPS-matching and logistic regression had higher uncertainty due to a wide confidence interval  
5  
6 (model 3).  
7  
8  
9

10  
11  
12 In infants exposed to biologics in utero, proportion of serious infections ranged from 0 to 7%  
13 depending on the treatment combination used by the mother during pregnancy (Figure 3). The types  
14 of serious infections that occurred during infants' first year of life were lymphadenitis, urinary tract  
15 infection, and acute bronchiolitis. In model 1 examining categories of maternal drug exposures only,  
16 we found no increased risk of serious infections in infants who were exposed to biologics (OR 0.50,  
17 95%CI 0.16 to 1.60), or DMARDs (OR 1.07, 95%CI 0.81 to 1.43) in utero, while glucocorticoids  
18 exposure appeared to possibly increase risk (OR 1.46, 95%CI 1.00 to 2.12). When maternal and  
19 infant factors were considered (model 2), the risk of serious infections associated with biologics  
20 exposure had an aOR of 0.56 (95%CI 0.17 to 1.81), DMARD/immunosuppressants had an aOR of  
21 1.09 (95%CI 0.81 to 1.45), and glucocorticoids an aOR of 1.13 (95%CI 0.77 to 1.66) (Table 3).  
22  
23 However, we found several maternal factors associated with an increased risk of infections in  
24 infants, including multiparity, maternal history of prior delivery resulting in a low birth weight infant,  
25 or premature infant, maternal use of anxiolytics, and maternal asthma diagnosis (Table 3). Factors  
26 associated with a lower risk of serious infections included being a female infant, having higher Apgar  
27 score at 1 minute, higher neighborhood income, and more antenatal visits. Sensitivity analysis using  
28 logistic regression in the HDPS-matched cohort did not change these results (model 3).  
29  
30  
31  
32  
33  
34  
35  
36  
37  
38  
39  
40  
41  
42  
43  
44  
45  
46  
47  
48  
49

## 50 Discussion

51  
52 In this study using linked administrative health data and a perinatal registry for a population-based  
53 cohort of women with autoimmune disease and their babies, we examined the association between  
54  
55  
56  
57

1  
2  
3 exposure to biologics during pregnancy and risk of serious infections in mothers and infants,  
4  
5 respectively. Specifically for mothers, these were infections requiring hospitalization during the post-  
6  
7 partum period; and for infants, these were infections requiring hospitalization during their first year  
8  
9 of life. We found that the proportion of serious infections in all groups was low. Our findings  
10  
11 suggest that there was no difference in risk of serious post-partum infections in women who used  
12  
13 biologics during pregnancy versus those who did not. Similarly, we did not observe a difference in  
14  
15 risk of serious infections during the first year of life in infants born to mothers who used biologics  
16  
17 during pregnancy compared to those who did not. While we examined all biologics used in the  
18  
19 cohort, TNF-alpha inhibitor biologics (94%) were the most common, and as such our results mostly  
20  
21 apply to these biologics and less so to those that are not TNF-alpha inhibitors. Our results did  
22  
23 demonstrate the association between several known factors with the increased risk of infections in  
24  
25 mothers, including higher BMI (24) and Cesarean section delivery (25,26); and in infants including  
26  
27 multiparity in mothers (27) and maternal asthma diagnosis (28).  
28  
29  
30  
31  
32  
33  
34

35 Indeed serious infections are a well-known safety outcome in patients using biologics to manage  
36  
37 their autoimmune diseases, and despite pregnant women and infants being vulnerable populations  
38  
39 there has been a dearth of evidence on this clinically important topic. One population-based study in  
40  
41 the United States by Desai et al. compared serious intrapartum infections among 776 users of  
42  
43 biologics compared to 1587 users of non-biologics and reported no meaningful increase risk of  
44  
45 serious infection during pregnancy (adjusted hazard ratio [aHR] 1.36, 95%CI 0.47 to 3.93) (29).  
46  
47 However, the authors did observe that the rate of infections increased noticeably in all treatment  
48  
49 groups as pregnancies approached term (29), thus, providing a rationale for the objective of our  
50  
51 study which examined the risk of infections around the time of childbirth, and post-partum. No  
52  
53 other studies to date have specifically investigated the association between biologics use and the risk  
54  
55  
56  
57  
58  
59  
60



1  
2  
3 of post-partum infections despite the fact that post-partum infections account for up to 10% of  
4 maternal deaths, and are a cause of short term morbidity and long term complications (30). It is  
5 therefore reassuring that our study did not show an association between biologics use during  
6 pregnancy and maternal risk of post-partum infections.  
7  
8  
9  
10

11  
12  
13  
14 Infections is a theoretical concern in infants exposed to biologics in utero, due to evidence of  
15 accumulation of certain biologics in cord blood (9). The immunosuppressive effect of TNF-alpha  
16 inhibitor accumulation is illustrated by a fatal case of disseminated Bacillus Calmette–Guérin (BCG)  
17 infection after BCG vaccination in an infant born to a mother treated with infliximab throughout  
18 her pregnancy (31). The infant received a BCG vaccination at 3 months of age, subsequently became  
19 ill, and died at 4.5 months of age from disseminated infection (31). Current recommendations to  
20 stop some biologics in the third trimester are largely based on such case reports and expert opinion  
21 (32). To date, there have only been two published abstracts examining the association of biologics  
22 exposure and risk of serious infections in infants. Using data collected by the Organization of  
23 Teratology Information Specialists (OTIS), Chambers et al. found similar proportions of serious  
24 infections during the first year of life in infants born to women with RA using biologics during  
25 pregnancy (2.8%), compared to those born to women with RA not treated with a biologic (3.9%),  
26 with a relative risk of 0.71 (95%CI 0.30 to 1.71) (33). In a registry of women with IBD, Chaparro et  
27 al. found that after a median follow up of 33 months post-partum, similarly, infants exposed to  
28 biologics in utero were not at greater risk of serious infections (HR 0.5, 95%CI 0.2 to 1.3) (34). Our  
29 study is the first to corroborate these results using population-based data.  
30  
31  
32  
33  
34  
35  
36  
37  
38  
39  
40  
41  
42  
43  
44  
45  
46  
47  
48  
49  
50

51  
52 This study has a number of strengths and limitations. The use of population-wide databases with  
53 high coverage lends this study greater generalizability; linkages between databases containing valid  
54  
55  
56  
57

1  
2  
3 information on all dispensed prescriptions (PharmaNet) and antenatal, intrapartum, and postpartum  
4 maternal and infant information (BCPDR) provides the ability to accurately determine the timing of  
5 all medication dispensations with respect to conception dates. Linkages between maternal and infant  
6 data allows for ascertainment of infant exposure status in utero. Altogether, these strengths  
7 minimize potential biases caused by problems such as selection bias, patient recall bias, reporting  
8 bias, and exposure misclassification. The main limitation of our study stems from the uncertainty of  
9 risk estimates attributable to the relatively small sample size of the exposed, as such, a doubling to  
10 tripling in the risk of serious infections remains compatible with the upper bound of the confidence  
11 intervals of our estimates. 'Depletion of susceptibles' was also a possible phenomenon. Our  
12 previous studies have shown that the proportion of women discontinuing their biologic became  
13 more prevalent as pregnancy progressed resulting in fewer women being exposed close to delivery,  
14 which could be an explanation for the low numbers of outcomes observed (20). Also due to the rare  
15 occurrence of the outcomes of interest, subgroup analyses of specific biologics, or specific  
16 autoimmune disease types were not possible. Other limitations included potential misclassification  
17 of the outcome, as a code for an infection could have been in any diagnostic field in the discharge  
18 abstract data and may not have been the primary reason for hospitalization. Furthermore, we could  
19 not obtain any data on breastfeeding practices which has been shown to be protective against  
20 infections requiring hospitalizations (35). However, our findings of other factors independently  
21 associated with serious infections, such as maternal BMI (24), Cesarean section delivery (25,26),  
22 infant gender (36), and maternal asthma diagnosis (28), are consistent with that reported in literature  
23 and thus lend validity to our results.

24  
25  
26 In conclusion, from this population-based cohort we did not observe differences in the risk of  
27 serious infections in women using or not using TNF-alpha inhibitor biologics during pregnancies or

1  
2  
3 in their offspring during the first year of life. Our findings are compatible with current  
4  
5 recommendations where discontinuation of TNF-alpha inhibitor biologics late in the pregnancy  
6  
7 could be considered, or if indicated, can be continued throughout the pregnancy (32,37). Our study  
8  
9 provides information for clinicians and women with autoimmune diseases regarding the risks of  
10  
11 serious infections when using biologics during pregnancy.  
12  
13  
14  
15

### 16 **Author Statement**

17  
18 Ms. Tsao had full access to all the data used in this study and takes responsibility for the integrity of  
19  
20 the data and accuracy of data analysis. As the lead author, Ms. Tsao affirms that this manuscript is an  
21  
22 honest, accurate, and transparent account of the study being reported; that no important aspects of  
23  
24 the study have been omitted; and that any discrepancies from the study as planned (and, if relevant,  
25  
26 registered) have been explained. Contributions of authors to this study are as follows, for concept  
27  
28 and design: De Vera, Tsao; acquisition, analysis, and interpretation of data: De Vera, Tsao; drafting  
29  
30 of manuscript: Tsao, De Vera; critical revision of manuscript for important intellectual content:  
31  
32 Tsao, De Vera, Sadatsafavi, Hanley, Lynd; statistical analysis: Tsao; obtained funding: De Vera. Dr.  
33  
34 Lynd has received honoraria from Boehringer Ingelheim and Pfizer Canada for consulting services  
35  
36 unrelated to this study, all other authors have declared no support from any organisation for the  
37  
38 submitted work; no financial relationships with any organisations that might have an interest in the  
39  
40 submitted work in the previous three years, no other relationships or activities that could appear to  
41  
42 have influenced the submitted work.  
43  
44  
45  
46  
47  
48  
49

### 50 **Data Sharing Statement**

51  
52 Due to privacy agreements, data used in this study cannot be shared.  
53  
54  
55  
56  
57

### Acknowledgements

The authors would like to thank: Dr. Eric C. Sayre for his contributions to SAS coding used in this study and Dr. Jeremy Rassen for his help in implementing the high-dimensional propensity score program.

### Conflicts of Interest

Dr. Larry Lynd has received honoraria from Boehringer Ingelheim and Pfizer Canada for consulting services unrelated to this study. All other authors have declared no support from any organization for the submitted work.

## References

1. Rosman Z, Shoenfeld Y, Zandman-Goddard G. Biologic therapy for autoimmune diseases: an update. *BMC Med*. 2013 Apr 4;11(1):88.
2. Tiligada E, Ishii M, Riccardi C, Spedding M, Simon H-U, Teixeira MM, et al. The expanding role of immunopharmacology – IUPHAR Review 16. *Br J Pharmacol*. 2015 Aug 1;n/a-n/a.
3. Scott DL. Biologics-Based Therapy for the Treatment of Rheumatoid Arthritis. *Clin Pharmacol Ther*. 2012 Jan 1;91(1):30–43.
4. Singh JA, Cameron C, Noorbaloochi S, Cullis T, Tucker M, Christensen R, et al. Risk of serious infection in biological treatment of patients with rheumatoid arthritis: a systematic review and meta-analysis. *The Lancet*. 2015 Jul 24;386(9990):258–65.
5. Brambell FW. The transmission of immunity from mother to young and the catabolism of immunoglobulins. *Lancet Lond Engl*. 1966 Nov 19;2(7473):1087–93.
6. Wood GW, Bjerrum K, Johnson B. Detection of IgG bound within human trophoblast. *J Immunol*. 1982 Oct 1;129(4):1479–84.
7. Kane SV, Acquah LA. Placental Transport of Immunoglobulins: A Clinical Review for Gastroenterologists Who Prescribe Therapeutic Monoclonal Antibodies to Women During Conception and Pregnancy. *Am J Gastroenterol*. 2009 Jan 1;104(1):228–33.
8. Junghans RP, Anderson CL. The protection receptor for IgG catabolism is the beta2-microglobulin-containing neonatal intestinal transport receptor. *Proc Natl Acad Sci U S A*. 1996 May 28;93(11):5512–6.
9. Soh MC, Nelson-Piercy C. High-risk pregnancy and the rheumatologist. *Rheumatol Oxf Engl*. 2015 Apr;54(4):572–87.
10. Vasiliauskas EA, Church JA, Silverman N, Barry M, Targan SR, Dubinsky MC. Case report: evidence for transplacental transfer of maternally administered infliximab to the newborn. *Clin Gastroenterol Hepatol Off Clin Pract J Am Gastroenterol Assoc*. 2006 Oct;4(10):1255–8.
11. Vinet E, Pineau C, Gordon C, Clarke AE, Bernatsky S. Biologic therapy and pregnancy outcomes in women with rheumatic diseases. *Arthritis Rheum*. 2009 May 15;61(5):587–92.
12. Population Data BC. Population Data BC: Data Linkage [Internet]. 2016 [cited 2017 Mar 13]. Available from: <https://www.popdata.bc.ca/datalinkage>
13. British Columbia Ministry of Health (2013): Medical Services Plan (MSP) Payment Information File. [Internet]. Population Data BC. Data Extract. MOH. 2014. Available from: <http://www.popdata.bc.ca/data>
14. Canadian Institute for Health Information (2013): Discharge Abstract Database (Hospital Separations). [Internet]. Population Data BC. Data Extract. MOH. 2014. Available from: <http://www.popdata.bc.ca/data>

15. BC Ministry of Health (2013): PharmaNet. [Internet]. BC Ministry of Health. Data Extract. Data Stewardship Committee. 2014. Available from: <http://www.popdata.bc.ca/data>
16. BC Vital Statistics Agency (2012): Vital Statistics Births. [Internet]. Population Data BC. Data Extract. BC Vital Statistics Agency. 2014. Available from: <http://www.popdata.bc.ca/data>
17. BC Vital Statistics Agency (2012): Vital Statistics Stillbirths. [Internet]. Population Data BC. Data Extract. BC Vital Statistics Agency. 2014. Available from: <http://www.popdata.bc.ca/data>
18. BC Vital Statistics Agency (2013): Vital Statistics Deaths. [Internet]. Population Data BC. Data Extract. BC Vital Statistics Agency. 2014. Available from: <http://www.popdata.bc.ca/data>
19. Perinatal Services BC (2012): British Columbia Perinatal Data Registry [Internet]. Population Data BC. Data Extract. PSBC. 2014. Available from: <http://www.perinataleservicesbc.ca/health-professionals/data-surveillance/perinatal-data-registry>
20. Tsao NW, Lynd LD, Sadatsafavi M, Hanley G, De Vera MA. Patterns of biologics utilization and discontinuation before and during pregnancy in women with autoimmune diseases: A population-based cohort study. *Arthritis Care Res.* 2017 Oct 3;
21. Romano M, Cacciatore A, Giordano R, La Rosa B. Postpartum period: three distinct but continuous phases. *J Prenat Med.* 2010;4(2):22–5.
22. Rasmussen KM, Catalano PM, Yaktine AL. New guidelines for weight gain during pregnancy: what obstetrician/gynecologists should know. *Curr Opin Obstet Gynecol.* 2009 Dec;21(6):521–6.
23. Schneeweiss S, Rassen JA, Glynn RJ, Avorn J, Mogun H, Brookhart MA. High-dimensional propensity score adjustment in studies of treatment effects using health care claims data. *Epidemiol Camb Mass.* 2009 Jul;20(4):512–22.
24. Axelsson D, Brynhildsen J, Blomberg M. Postpartum infection in relation to maternal characteristics, obstetric interventions and complications. *J Perinat Med.* 2017 Jun 26;
25. Gibbs RS. Clinical risk factors for puerperal infection. *Obstet Gynecol.* 1980 May;55(5 Suppl):178S-184S.
26. Yokoe DS, Christiansen CL, Johnson R, Sands KE, Livingston J, Shtatland ES, et al. Epidemiology of and surveillance for postpartum infections. *Emerg Infect Dis.* 2001;7(5):837–41.
27. Jacoby P, Glass K, Moore HC. Characterizing the risk of respiratory syncytial virus in infants with older siblings: a population-based birth cohort study. *Epidemiol Infect.* 2017;145(2):266–71.

- 1
  - 2
  - 3
  - 4
  - 5
  - 6
  - 7
  - 8
  - 9
  - 10
  - 11
  - 12
  - 13
  - 14
  - 15
  - 16
  - 17
  - 18
  - 19
  - 20
  - 21
  - 22
  - 23
  - 24
  - 25
  - 26
  - 27
  - 28
  - 29
  - 30
  - 31
  - 32
  - 33
  - 34
  - 35
  - 36
  - 37
  - 38
  - 39
  - 40
  - 41
  - 42
  - 43
  - 44
  - 45
  - 46
  - 47
  - 48
  - 49
  - 50
  - 51
  - 52
  - 53
  - 54
  - 55
  - 56
  - 57
  - 58
  - 59
  - 60
28. Carroll KN, Gebretsadik T, Minton P, Woodward K, Liu Z, Miller EK, et al. Influence of maternal asthma on etiology and severity of infant acute respiratory infection. *J Allergy Clin Immunol*. 2012 May;129(5):1236–42.
29. Desai RJ, Bateman BT, Huybrechts KF, Patorno E, Hernandez-Diaz S, Park Y, et al. Risk of serious infections associated with use of immunosuppressive agents in pregnant women with autoimmune inflammatory conditions: cohort study. *BMJ*. 2017 Mar 6;356:j895.
30. Bonet M, Oladapo OT, Khan DN, Mathai M, Gülmezoglu AM. New WHO guidance on prevention and treatment of maternal peripartum infections. *Lancet Glob Health*. 2015 Nov 1;3(11):e667–8.
31. Cheent K, Nolan J, Shariq S, Kiho L, Pal A, Arnold J. Case Report: Fatal case of disseminated BCG infection in an infant born to a mother taking infliximab for Crohn's disease. *J Crohns Colitis*. 2010 Nov;4(5):603–5.
32. Flint J, Panchal S, Hurrell A, Venne M van de, Gayed M, Schreiber K, et al. BSR and BHPR guideline on prescribing drugs in pregnancy and breastfeeding—Part I: standard and biologic disease modifying anti-rheumatic drugs and corticosteroids. *Rheumatology*. 2016 Sep 1;55(9):1693–7.
33. Chambers, CD, Johnson, DL, Luo, Y, Xu, R, Jones, KL. Serious or opportunistic infections in infants born to pregnant women with rheumatoid arthritis and treated with a biologic medication. American College of Rheumatology Annual Meeting; 2017 Sep 18; San Diego, CA.
34. Chaparro, M, Magro, F, Savarino, E, Zabana, Y, Pugliese, D, Bar-Gil Shitrit, A, et al. Long-term safety of in utero exposure to anti-TNF alpha drugs for the treatment of inflammatory bowel diseases (IBD): Interim results of the TEDDY study. 11th Congr Eur Crohns Colitis Organ. :S415.
35. Størdal K, Lundeby KM, Brantsæter AL, Haugen M, Nakstad B, Lund-Blix NA, et al. Breast-feeding and Infant Hospitalization for Infections: Large Cohort and Sibling Analysis. *J Pediatr Gastroenterol Nutr*. 2017 Aug;65(2):225–31.
36. Muenchhoff M, Goulder PJR. Sex Differences in Pediatric Infectious Diseases. *J Infect Dis*. 2014 Jul 15;209(Suppl 3):S120–6.
37. Skorpen CG, Hoeltzenbein M, Tincani A, Fischer-Betz R, Elefant E, Chambers C, et al. The EULAR points to consider for use of antirheumatic drugs before pregnancy, and during pregnancy and lactation. *Ann Rheum Dis*. 2016 Feb 17;annrheumdis-2015-208840.

1  
2  
3 **Tables and Figures**  
4

5 **Figure 1. Schematic diagram of databases and linkages facilitating study analyses**  
6  
7  
8  
9  
10  
11  
12  
13  
14  
15  
16  
17  
18  
19  
20  
21  
22  
23  
24  
25  
26  
27  
28  
29  
30  
31  
32  
33  
34  
35  
36  
37  
38  
39  
40  
41  
42  
43  
44  
45  
46  
47  
48  
49  
50  
51  
52  
53  
54  
55  
56  
57  
58  
59  
60

For peer review only



**Table 1. Characteristics of moms and infants in pregnancies exposed and unexposed to biologics**

| Maternal Characteristics             | Biologic exposed | Biologic unexposed |
|--------------------------------------|------------------|--------------------|
| <b>Current pregnancy</b>             |                  |                    |
| Maternal age at delivery (mean (SD)) | 31.0 (4.7)       | 31.2 (5.2)         |
| Multiparous                          | 44 (44%)         | 4998 (59%)         |
| Antenatal visits (mean (SD))         | 8.9 (3.6)        | 9.0 (3.9)          |
| Gestational hypertension             | 5 (5%)           | 647 (8%)           |
| Gestational diabetes                 | 12 (12%)         | 669 (8%)           |
| Delivery via Cesarean section        | 40 (40%)         | 2849 (33%)         |
| Neighbourhood income quintiles       |                  |                    |
| 5 <sup>th</sup> percentile           | 21 (21%)         | 1763 (21%)         |
| 25 <sup>th</sup> percentile          | 24 (24%)         | 1699 (20%)         |
| Median (50 <sup>th</sup> percentile) | 17 (17%)         | 1845 (22%)         |
| 75 <sup>th</sup> percentile          | 22 (22%)         | 1803 (21%)         |
| 95 <sup>th</sup> percentile          | 16 (16%)         | 1397 (16%)         |
| Hospitalization at baseline          | 99 (99%)         | 8412 (99%)         |
| BMI at baseline (mean (SD))          | 24.7 (4.6)       | 24.6 (4.5)         |
| BMI categories                       |                  |                    |
| Obese                                | 9 (9%)           | 851 (10%)          |
| Overweight                           | 15 (15%)         | 1342 (16%)         |
| <b>Prior obstetrical history</b>     |                  |                    |
| Premature delivery                   | 5 (5%)           | 500 (6%)           |
| Spontaneous abortion                 | 28 (28%)         | 2230 (26%)         |
| Delivery with neonatal death         | <5 <sup>†</sup>  | 52 (0.6%)          |
| Stillbirth                           | <5 <sup>†</sup>  | 103 (1%)           |
| Low birth weight infant              | 5 (5%)           | 243 (3%)           |
| Infant with anomalies                | -                | 74 (1%)            |
| <b>Autoimmune disease type*</b>      |                  |                    |
| Inflammatory bowel disease           | 50 (50%)         | 2471 (29%)         |
| Rheumatoid arthritis                 | 44 (44%)         | 1756 (21%)         |
| Psoriasis/psoriatic arthritis        | 16 (16%)         | 3441 (40%)         |
| Juvenile idiopathic arthritis        | 8 (8%)           | 93 (1%)            |

|                                        |                         |                           |
|----------------------------------------|-------------------------|---------------------------|
| Systemic autoimmune rheumatic diseases | 5 (5%)                  | 1063 (12%)                |
| Ankylosing spondylitis                 | 5 (5%)                  | 417 (5%)                  |
| <b>Biologics<sup>‡</sup></b>           |                         |                           |
| Infliximab                             | 54 (54%)                |                           |
| Etanercept                             | 41 (41%)                |                           |
| Adalimumab                             | 39 (39%)                |                           |
| Other biologic**                       | 18 (18%)                |                           |
| <b>Concomitant medications</b>         |                         |                           |
| DMARDs                                 | 53 (53%)                | 1843 (22%)                |
| Glucocorticoids                        | 54 (54%)                | 1065 (13%)                |
| Traditional NSAIDs                     | 16 (16%)                | 941 (11%)                 |
| Antidepressants                        | 16 (16%)                | 783 (9%)                  |
| Anxiolytics                            | <5 <sup>†</sup>         | 394 (5%)                  |
| COX2 NSAIDs                            | <5 <sup>†</sup>         | 56 (0.7%)                 |
| <b>Comorbidities</b>                   |                         |                           |
| Anxiety                                | 19 (19%)                | 1368 (16%)                |
| Mood disorders                         | 10 (10%)                | 432 (5%)                  |
| Asthma                                 | <5 <sup>†</sup>         | 154 (2%)                  |
| <b>Infant Characteristics</b>          | <b>Biologic exposed</b> | <b>Biologic unexposed</b> |
| Female sex                             | 55 (55%)                | 4159 (49%)                |
| Gestational age (mean (SD))            | 37.8 weeks (2.4)        | 38.4 weeks (2.2)          |
| Birth weight (mean (SD))               | 3158 grams (634)        | 3385 grams (204)          |
| Apgar score at 1 minute (mean (SD))    | 8.1 (1.6)               | 8.0 (1.7)                 |
| Apgar score at 5 minutes (mean (SD))   | 8.9 (1.1)               | 9.0 (1.0)                 |

SD = standard deviation, BMI = body mass index, DMARDs = disease modifying anti-rheumatic drugs, NSAIDs = non-steroidal anti-inflammatory drugs, COX = cyclooxygenase

\*Sum of percentages exceed 100% due to some individuals having more than one diagnosis

<sup>†</sup>All cell sizes <5 are suppressed due to privacy restrictions of data sharing agreements

<sup>‡</sup>Sum of percentages exceed 100% due to some pregnancies being exposed to more than one drug

\*\*Other biologics include: abatacept, alefacept, certolizumab pegol, golimumab, rituximab, tocilizumab, and ustekinumab

1  
2  
3  
4  
5  
6  
7  
8  
9  
10  
11  
12  
13  
14  
15  
16  
17  
18  
19  
20  
21  
22  
23  
24  
25  
26  
27  
28  
29  
30  
31  
32  
33  
34  
35  
36  
37  
38  
39  
40  
41  
42  
43  
44  
45  
46  
47  
48  
49  
50  
51  
52  
53  
54  
55  
56  
57  
58  
59  
60

**Figure 2. Rates of maternal post-partum serious infections based on drug exposure categories**

For peer review only

1  
2  
3  
4 **Figure 3. Rates of infant serious infections during the first year of life based on in utero drug**  
5 **exposure categories**  
6  
7  
8  
9  
10  
11  
12  
13  
14  
15  
16  
17  
18  
19  
20  
21  
22  
23  
24  
25  
26  
27  
28  
29  
30  
31  
32  
33  
34  
35  
36  
37  
38  
39  
40  
41  
42  
43  
44  
45  
46  
47  
48  
49  
50  
51  
52  
53  
54  
55  
56  
57  
58  
59  
60

For peer review only

**Table 2. Risk of serious maternal post-partum infections associated with biologics exposure during pregnancy**

| Maternal serious infections |                           |                     |
|-----------------------------|---------------------------|---------------------|
|                             | Parameter                 | OR (95% CI)         |
| <b>Unadjusted</b>           | Biologics                 | 0.90 (0.28 to 2.84) |
| <b>Model 1</b>              | Biologics                 | 0.88 (0.27 to 2.82) |
|                             | DMARDs/immunosuppressants | 0.98 (0.68 to 1.40) |
|                             | Glucocorticoids           | 1.07 (0.64 to 1.77) |
| <b>Model 2</b>              | Biologics                 | 0.79 (0.24 to 2.54) |
|                             | DMARDs/immunosuppressants | 0.98 (0.68 to 1.40) |
|                             | Glucocorticoids           | 1.00 (0.60 to 1.67) |
|                             | Multiparity               | 0.60 (0.47 to 0.76) |
|                             | Anxiety                   | 1.36 (1.02 to 1.82) |
|                             | Prior hospital admissions | 1.19 (1.06 to 1.34) |
|                             | BMI at baseline           | 1.02 (1.00 to 1.05) |
| <b>Model 3</b>              | Cesarean section delivery | 2.01 (1.58 to 2.55) |
|                             | Biologics                 | 1.16 (0.34 to 4.14) |
| <b>HDPS-matched cohort</b>  |                           |                     |

OR = odds ratio, HDPS = high-dimensional propensity score, DMARDs = disease modifying anti-rheumatic drugs, BMI = body mass index

**Table 3. Risk of serious infant infections during the first year of life associated with biologics exposure in utero**

|                                            |                                         | Infant serious infections |
|--------------------------------------------|-----------------------------------------|---------------------------|
|                                            | Parameter                               | OR (95% CI)               |
| <b>Unadjusted</b>                          | Biologics                               | 0.58 (0.18 to 1.85)       |
| <b>Model 1</b>                             | Biologics                               | 0.50 (0.16 to 1.60)       |
|                                            | DMARDs/immunosuppressants               | 1.07 (0.81 to 1.43)       |
|                                            | Glucocorticoids                         | 1.46 (1.00 to 2.12)       |
| <b>Model 2</b>                             | Biologics                               | 0.56 (0.17 to 1.81)       |
|                                            | DMARDs/immunosuppressants               | 1.09 (0.81 to 1.45)       |
|                                            | Glucocorticoids                         | 1.13 (0.77 to 1.66)       |
|                                            | Female sex                              | 0.73 (0.60 to 0.89)       |
|                                            | Multiparity                             | 1.56 (1.25 to 1.95)       |
|                                            | Maternal antenatal visits               | 0.97 (0.94 to 0.99)       |
|                                            | Prior delivery with anomaly             | 2.04 (0.98 to 4.26)       |
|                                            | Prior delivery with low birth weight    | 1.67 (1.05 to 2.64)       |
|                                            | Prior premature delivery                | 1.73 (1.21 to 2.47)       |
|                                            | Maternal anti-depressant use            | 1.30 (0.97 to 1.75)       |
|                                            | Maternal anxiolytics use                | 1.66 (1.15 to 2.40)       |
|                                            | Maternal rheumatoid arthritis diagnosis | 1.17 (0.93 to 1.47)       |
|                                            | Maternal asthma diagnosis               | 2.00 (1.18 to 3.39)       |
| Apgar score at 1 minute                    | 0.87 (0.83 to 0.92)                     |                           |
| Neighbourhood income quintile              | 0.91 (0.85 to 0.98)                     |                           |
| <b>Model 3<br/>HDPS-matched<br/>cohort</b> | Biologics                               | 0.49 (0.15 to 1.62)       |

OR = odds ratio, HDPS = high-dimensional propensity score, DMARDs = disease modifying anti-rheumatic drugs

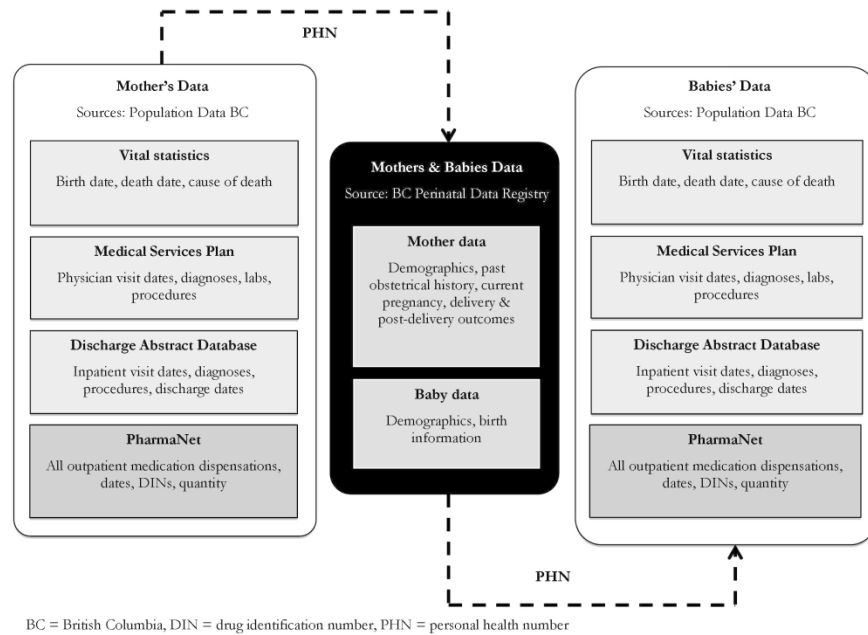

45 Figure 1. Schematic diagram of databases and linkages facilitating study analyses

46 215x279mm (300 x 300 DPI)

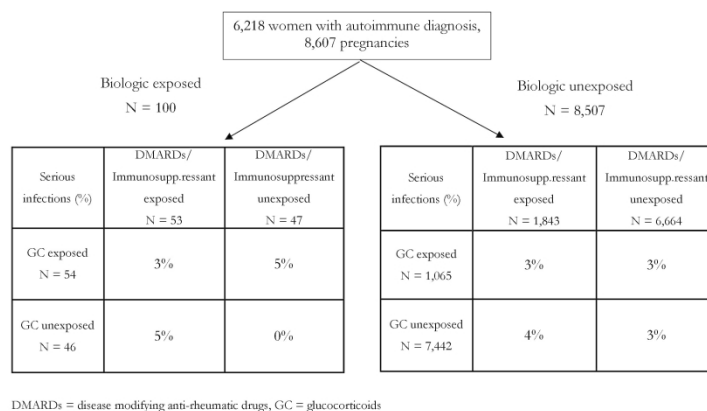

Figure 2. Rates of maternal post-partum serious infections based on drug exposure categories

279x215mm (300 x 300 DPI)



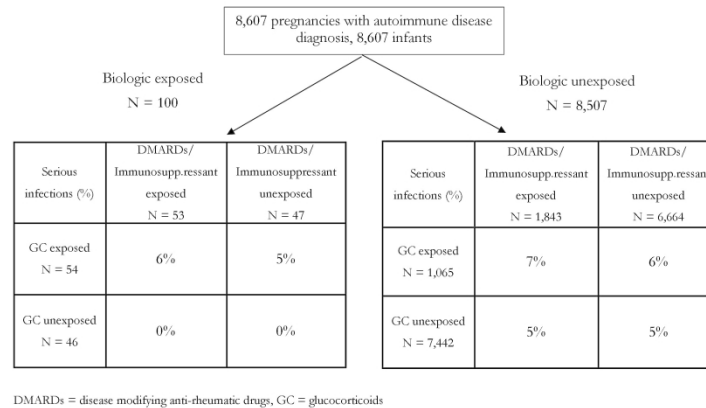

Figure 3. Rates of infant serious infections during the first year of life based on in utero drug exposure categories

279x215mm (300 x 300 DPI)

## STROBE Statement—checklist of items that should be included in reports of observational studies

|                              | Item No | Recommendation                                                                                                                                                                             | Page numbers                                               |
|------------------------------|---------|--------------------------------------------------------------------------------------------------------------------------------------------------------------------------------------------|------------------------------------------------------------|
| <b>Title and abstract</b>    | 1 ✓     | (a) Indicate the study's design with a commonly used term in the title or the abstract                                                                                                     | Page 1, title                                              |
|                              | ✓       | (b) Provide in the abstract an informative and balanced summary of what was done and what was found                                                                                        | Page 3, abstract                                           |
| <b>Introduction</b>          |         |                                                                                                                                                                                            |                                                            |
| Background/rationale         | 2 ✓     | Explain the scientific background and rationale for the investigation being reported                                                                                                       | Page 6                                                     |
| Objectives                   | 3 ✓     | State specific objectives, including any prespecified hypotheses                                                                                                                           | Page 7, top                                                |
| <b>Methods</b>               |         |                                                                                                                                                                                            |                                                            |
| Study design                 | 4 ✓     | Present key elements of study design early in the paper                                                                                                                                    | Page 3, abstract; Pages 7-10, methods                      |
| Setting                      | 5 ✓     | Describe the setting, locations, and relevant dates, including periods of recruitment, exposure, follow-up, and data collection                                                            | Pages 7, 8, data sources and study cohort                  |
| Participants                 | 6 ✓     | (a) <i>Cohort study</i> —Give the eligibility criteria, and the sources and methods of selection of participants. Describe methods of follow-up                                            | Page 8, study cohort and exposure definition               |
|                              |         | <i>Case-control study</i> —Give the eligibility criteria, and the sources and methods of case ascertainment and control selection. Give the rationale for the choice of cases and controls |                                                            |
|                              |         | <i>Cross-sectional study</i> —Give the eligibility criteria, and the sources and methods of selection of participants                                                                      |                                                            |
|                              |         | (b) <i>Cohort study</i> —For matched studies, give matching criteria and number of exposed and unexposed                                                                                   |                                                            |
|                              |         | <i>Case-control study</i> —For matched studies, give matching criteria and the number of controls per case                                                                                 |                                                            |
|                              |         |                                                                                                                                                                                            |                                                            |
| Variables                    | 7 ✓     | Clearly define all outcomes, exposures, predictors, potential confounders, and effect modifiers. Give diagnostic criteria, if applicable                                                   | Pages 8-10, exposure, outcome and covariates               |
| Data sources/<br>measurement | 8* ✓    | For each variable of interest, give sources of data and details of methods of assessment (measurement). Describe comparability of assessment methods if there is more than one group       | Pages 8-10, exposure, outcome and covariates               |
| Bias                         | 9 ✓     | Describe any efforts to address potential sources of bias                                                                                                                                  | Pages 9, 10, statistical analysis and sensitivity analysis |
| Study size                   | 10      | Explain how the study size was arrived at                                                                                                                                                  |                                                            |
| Quantitative variables       | 11 ✓    | Explain how quantitative variables were handled in the analyses. If applicable, describe which groupings were chosen and why                                                               | Page 9, 10, covariates                                     |
| Statistical methods          | 12 ✓    | (a) Describe all statistical methods, including those used to control for confounding                                                                                                      | Page 10, 11, statistical analysis                          |
|                              |         | (b) Describe any methods used to examine subgroups and interactions                                                                                                                        |                                                            |
|                              |         | (c) Explain how missing data were addressed                                                                                                                                                |                                                            |
|                              |         | (d) <i>Cohort study</i> —If applicable, explain how loss to follow-up was addressed                                                                                                        |                                                            |
|                              |         | <i>Case-control study</i> —If applicable, explain how matching of cases and controls was addressed                                                                                         |                                                            |
|                              |         | <i>Cross-sectional study</i> —If applicable, describe analytical methods taking account of sampling strategy                                                                               |                                                            |
|                              | ✓       | (e) Describe any sensitivity analyses                                                                                                                                                      | Page 10, 11, statistical analysis                          |

Continued on next page

**Results**

|                          |     |                                                                                                                                                                                                                                                                                                                                                                                                               |                                                                                                                       |
|--------------------------|-----|---------------------------------------------------------------------------------------------------------------------------------------------------------------------------------------------------------------------------------------------------------------------------------------------------------------------------------------------------------------------------------------------------------------|-----------------------------------------------------------------------------------------------------------------------|
| Participants             | 13* | (a) Report numbers of individuals at each stage of study—eg numbers potentially eligible, examined for eligibility, confirmed eligible, included in the study, completing follow-up, and analysed<br>(b) Give reasons for non-participation at each stage<br>(c) Consider use of a flow diagram                                                                                                               | Page 11, results; Figures 2 and 3                                                                                     |
| Descriptive data         | 14* | (a) Give characteristics of study participants (eg demographic, clinical, social) and information on exposures and potential confounders<br>(b) Indicate number of participants with missing data for each variable of interest<br>(c) <i>Cohort study</i> —Summarise follow-up time (eg, average and total amount)                                                                                           | Page 11, 12, results; Table 1<br>Page 8, 9, methods (follow up defined in methods, there were no losses to follow up) |
| Outcome data             | 15* | <i>Cohort study</i> —Report numbers of outcome events or summary measures over time<br><i>Case-control study</i> —Report numbers in each exposure category, or summary measures of exposure<br><i>Cross-sectional study</i> —Report numbers of outcome events or summary measures                                                                                                                             | Page 11-13, results; Figures 2 and 3                                                                                  |
| Main results             | 16  | (a) Give unadjusted estimates and, if applicable, confounder-adjusted estimates and their precision (eg, 95% confidence interval). Make clear which confounders were adjusted for and why they were included<br>(b) Report category boundaries when continuous variables were categorized<br>(c) If relevant, consider translating estimates of relative risk into absolute risk for a meaningful time period | Tables 2 and 3<br>Pages 9-10, covariates                                                                              |
| Other analyses           | 17  | Report other analyses done—eg analyses of subgroups and interactions, and sensitivity analyses                                                                                                                                                                                                                                                                                                                | Tables 2 and 3                                                                                                        |
| <b>Discussion</b>        |     |                                                                                                                                                                                                                                                                                                                                                                                                               |                                                                                                                       |
| Key results              | 18  | Summarise key results with reference to study objectives                                                                                                                                                                                                                                                                                                                                                      | Page 13                                                                                                               |
| Limitations              | 19  | Discuss limitations of the study, taking into account sources of potential bias or imprecision. Discuss both direction and magnitude of any potential bias                                                                                                                                                                                                                                                    | Pages 15, 16                                                                                                          |
| Interpretation           | 20  | Give a cautious overall interpretation of results considering objectives, limitations, multiplicity of analyses, results from similar studies, and other relevant evidence                                                                                                                                                                                                                                    | Pages 15, 16                                                                                                          |
| Generalisability         | 21  | Discuss the generalisability (external validity) of the study results                                                                                                                                                                                                                                                                                                                                         | Page 16                                                                                                               |
| <b>Other information</b> |     |                                                                                                                                                                                                                                                                                                                                                                                                               |                                                                                                                       |
| Funding                  | 22  | Give the source of funding and the role of the funders for the present study and, if applicable, for the original study on which the present article is based                                                                                                                                                                                                                                                 | Page 2, end                                                                                                           |

\*Give information separately for cases and controls in case-control studies and, if applicable, for exposed and unexposed groups in cohort and cross-sectional studies.

**Note:** An Explanation and Elaboration article discusses each checklist item and gives methodological background and published examples of transparent reporting. The STROBE checklist is best used in conjunction with this article (freely available on the Web sites of PLoS Medicine at <http://www.plosmedicine.org/>, Annals of Internal Medicine at <http://www.annals.org/>, and Epidemiology at <http://www.epidem.com/>). Information on the STROBE Initiative is available at [www.strobe-statement.org](http://www.strobe-statement.org).

# BMJ Open

## Use of biologics during pregnancy and risk of serious infections in the mother and baby: A Canadian population-based cohort study

|                                 |                                                                                                                                                                                                                                                                                                                                                                                                                                                                                                                                                                                                                          |
|---------------------------------|--------------------------------------------------------------------------------------------------------------------------------------------------------------------------------------------------------------------------------------------------------------------------------------------------------------------------------------------------------------------------------------------------------------------------------------------------------------------------------------------------------------------------------------------------------------------------------------------------------------------------|
| Journal:                        | <i>BMJ Open</i>                                                                                                                                                                                                                                                                                                                                                                                                                                                                                                                                                                                                          |
| Manuscript ID                   | bmjopen-2018-023714.R1                                                                                                                                                                                                                                                                                                                                                                                                                                                                                                                                                                                                   |
| Article Type:                   | Research                                                                                                                                                                                                                                                                                                                                                                                                                                                                                                                                                                                                                 |
| Date Submitted by the Author:   | 11-Sep-2018                                                                                                                                                                                                                                                                                                                                                                                                                                                                                                                                                                                                              |
| Complete List of Authors:       | Tsao, Nicole; University of British Columbia, Faculty of Pharmaceutical Sciences; Arthritis Research Canada, Lynd, Larry; University of British Columbia, Faculty of Pharmaceutical Sciences; Centre for Health Evaluation and Outcomes Sciences Sayre, Eric; Arthritis Research Canada, Sadatsafavi, Mohsen; University of British Columbia, Faculty of Pharmaceutical Sciences; Centre for Clinical Epidemiology and Evaluation Hanley, Gillian; University of British Columbia, Obstetrics & Gynaecology De Vera, MA ; University of British Columbia, Faculty of Pharmaceutical Sciences; Arthritis Research Canada, |
| <b>Primary Subject Heading</b>: | Epidemiology                                                                                                                                                                                                                                                                                                                                                                                                                                                                                                                                                                                                             |
| Secondary Subject Heading:      | Immunology (including allergy), Obstetrics and gynaecology, Pharmacology and therapeutics, Rheumatology                                                                                                                                                                                                                                                                                                                                                                                                                                                                                                                  |
| Keywords:                       | Adverse events < THERAPEUTICS, RHEUMATOLOGY, Inflammatory bowel disease < GASTROENTEROLOGY, EPIDEMIOLOGY                                                                                                                                                                                                                                                                                                                                                                                                                                                                                                                 |
|                                 |                                                                                                                                                                                                                                                                                                                                                                                                                                                                                                                                                                                                                          |

SCHOLARONE™  
Manuscripts

1  
2  
3 **Use of biologics during pregnancy and risk of serious infections in the mother and baby: A**  
4  
5 **Canadian population-based cohort study**  
6  
7

8 **Authors:** Nicole W. Tsao, Larry D. Lynd, Eric C. Sayre, Mohsen Sadatsafavi, Gillian Hanley, Mary  
9  
10 A. De Vera  
11

12 Nicole W Tsao PhD, Faculty of Pharmaceutical Sciences University of British Columbia,  
13 Vancouver, Canada, V6T 1Z3, Larry D Lynd Professor, Faculty of Pharmaceutical Sciences  
14 University of British Columbia, Vancouver, Canada, V6T 1Z3, Eric C. Sayre, Arthritis Research  
15 Canada, Richmond, Canada, V6X 2C7, Mohsen Sadatsafavi Assistant Professor, Faculty of  
16 Pharmaceutical Sciences University of British Columbia, Vancouver, Canada, V6T 1Z3, Gillian  
17 Hanley Assistant Professor, Faculty of Medicine, Department of Obstetrics & Gynecology,  
18 University of British Columbia, Vancouver, Canada, V6Z 2K5, Mary A De Vera Assistant  
19 Professor, Faculty of Pharmaceutical Sciences University of British Columbia, Vancouver, Canada,  
20 V6T 1Z3  
21  
22  
23  
24  
25  
26  
27  
28  
29  
30  
31  
32

33 **Corresponding author:**  
34

35 Mary A. De Vera, PhD  
36 University of British Columbia Faculty of Pharmaceutical Sciences  
37 2405 Wesbrook Mall  
38 Vancouver, BC, V6T 1Z3  
39  
40  
41  
42  
43  
44  
45 Tel: 604-221-8767; Email: [mdevera@mail.ubc.ca](mailto:mdevera@mail.ubc.ca)  
46

47 **Key words:** biologics, pregnancy, infants, infections, autoimmune diseases  
48  
49  
50  
51

52 **Manuscript word count: 3234**  
53  
54  
55  
56  
57

1  
2  
3  
4  
5  
6  
7  
8 **Titles, funding, and grant support:**  
9

10 Dr. Tsao is a Canadian Institutes of Health Research Fellowship holder.

11  
12  
13 Dr. Lynd is a Professor, and Director of Collaboration for Outcomes Research and  
14  
15 Evaluation.

16  
17  
18 Dr. Sayre is a Research Associate and Statistician at Arthritis Research Canada

19  
20 Dr. Sadatsafavi is an Assistant Professor, Canadian Institutes of Health Research  
21  
22 New Investigator, and Michael Smith Foundation for Health Research Scholar

23  
24  
25 Dr. Hanley is an Assistant Professor, Canadian Institutes of Health Research New  
26  
27 Investigator, and a recipient of Canadian Cancer Society Research Institute Capacity  
28  
29 Development Award.

30  
31  
32 Dr. De Vera is an Assistant Professor, Canada Research Chair in Medication  
33  
34 Adherence, Utilization, and Outcomes, The Arthritis Society Network Scholar, and  
35  
36 Michael Smith Foundation for Health Research Scholar.

37  
38  
39 This research was funded by Arthritis Society Operating Grant (YIO-13-07) and  
40  
41 Canadian Institutes of Health Research Operating Grant: Analyses of Existing  
42  
43 Canadian Cohorts and Databases (AO1-151540). The funders had no part in the  
44  
45 design, conduct, or reporting of this study.  
46  
47  
48  
49  
50  
51  
52  
53  
54  
55  
56  
57

## Abstract

**Objectives:** To investigate the association between exposure to biologics during pregnancy and serious infections in mothers and infants.

**Design:** Retrospective cohort study

**Setting:** Population-based

**Participants:** Women with one or more autoimmune diseases identified by International Classification of Diseases 9<sup>th</sup>/10<sup>th</sup> revision codes in healthcare administrative databases in British Columbia, Canada, who had pregnancies ending in a live or still birth between January 1st, 2002 and December 31st, 2012. Women were defined as exposed if they had at least one biologic prescription during pregnancy, and infants born to these women were considered exposed in utero. Disease-matched women with no biologics prescriptions during pregnancy, and their infants, comprised the unexposed groups.

**Primary outcome measures:** Serious infections requiring hospitalization.

**Results:** Over the 10-year study period, there were 6,218 women (8,607 pregnancies) who had an autoimmune disease diagnosis; of which 90 women were exposed to biologics during pregnancy, with 100 babies born to these women. Among women exposed to biologics during pregnancy, occurrence of serious post-partum infections were low, ranging from 0 to 5%, depending on concomitant exposures to immunosuppressants. In multivariable models using logistic regression, the adjusted odds ratio (aOR) for the association of biologics exposure with serious maternal post-partum infections was 0.79 (95% confidence interval [CI] 0.24 to 2.54). In infants exposed to biologics in utero, occurrence of serious infections during the first year of life ranged from 0 to 7%, depending on concomitant exposures to immunosuppressants in utero. Multivariable models showed no association between biologics exposure in utero and serious infant infections (aOR 0.56, 95%CI 0.17 to 1.81).

1  
2  
3 **Conclusions:** These population-based data suggest that the use of biologics by women with  
4  
5 autoimmune diseases during pregnancy is not associated with an increased risk of serious infections  
6  
7 in mothers, during post-partum, or in infants during the first year of life.  
8  
9  
10  
11  
12  
13  
14  
15  
16  
17  
18  
19  
20  
21  
22  
23  
24  
25  
26  
27  
28  
29  
30  
31  
32  
33  
34  
35  
36  
37  
38  
39  
40  
41  
42  
43  
44  
45  
46  
47  
48  
49  
50  
51  
52  
53  
54  
55  
56  
57  
58  
59  
60

For peer review only



## Article Summary

### Strengths and limitations of this study

- This is the first population-based cohort study to examine the risk of serious post-partum infections in mothers who were using biologics during pregnancy, and in infants exposed in utero.
- We used individual-level, de-identified, longitudinal data on all health services (physician visits, hospitalizations, and prescription medications) covering the entire population of the province, linked with a perinatal registry covering >99% of births.
- We used high-dimensional propensity score matching as a sensitivity analysis to the traditional multivariable models.
- The data sources come from administrative databases not primarily collected for research purposes and thus rely on accuracy of diagnostic coding.
- Exposures and outcomes remain relatively rare and as such, caution should be exercised when interpreting the findings in light of this context.

## Introduction

Biologics have revolutionized the management of several autoimmune chronic conditions, and are commonly used in inflammatory arthritis including rheumatoid arthritis (RA), ankylosing spondylitis (AS), psoriatic arthritis (PsA) as well as inflammatory bowel disease (IBD, ulcerative colitis and Crohn's disease) (1,2). They are typically genetically engineered parts of, or whole, immunoglobulin Gs (IgG) that inhibit specific components of the immune system that play pivotal roles in inflammation (3). Despite their established efficacy in managing autoimmune diseases, treatment with biologics is not without risks. Network meta-analyses show a significant increase in serious infections in RA patients treated with biologics alone (odds ratio [OR] 1.31; 95% credible interval 1.09 to 1.58) or in combination with traditional disease modifying anti-rheumatic drugs (DMARDs) (OR 1.34; 95% confidence interval [CI] 1.09 to 1.69) compared to DMARDs alone (4).

In pregnancy, infection risk is a unique safety outcome in that it can occur both in the mother and her infant possibly as a result of exposure to the same offending agent. Additionally, the risk of infections may already be elevated for the mother during the delivery and post-partum periods, and for the neonate after birth when their immune system is still naïve. During pregnancy, IgG is transferred from the maternal to the fetal circulation by receptor-mediated binding of the Fc $\gamma$  portion of the IgG molecule and its receptor, FcRn (Fc receptor neonatal) (5–7). The FcRn is also found to have a protective effect on IgG degradation, extending its lifespan, leading to accumulation in the infant for upwards of six to eight months (8). With infliximab and adalimumab having higher affinity for FcRn (9), levels of these biologics in offspring cord blood have been reported to be 300–400% higher than levels in the maternal circulation (10). Furthermore, detectable, and even therapeutic, levels of biologics in infant serum have been confirmed in case reports of infants exposed in utero (10–12). However, to date few epidemiologic studies have examined the risk of

1  
2  
3 infections in women using biologics during pregnancy, or in infants that were exposed to biologics  
4  
5 in utero. Our objectives were to investigate the association between exposure to biologics during  
6  
7 pregnancy and serious infections in 1) mothers during the post-partum period; and 2) infants during  
8  
9 the first year of life.  
10  
11  
12  
13

## 14 **Methods**

### 15 Data sources

16  
17  
18 Data for mothers and babies were obtained through Population Data BC, a repository of individual-  
19  
20 level, de-identified, longitudinal data on all health services covering the entire population of BC  
21  
22 (estimated 4.6 million residents, December 2016 (13)). Specifically, respective data for mothers and  
23  
24 babies comprised four linked databases including: 1) Medical Services Plan (MSP) database – all  
25  
26 provincially-funded physician visits, ordered laboratory tests and diagnostic procedures (x-rays,  
27  
28 ultrasounds etc.) (14); 2) Discharge Abstract Database (DAD) – all hospital admissions and  
29  
30 discharges (15); 3) PharmaNet – a comprehensive prescription drug database that captures all  
31  
32 prescriptions dispensed in community pharmacies regardless of payment source, since 1996 (16);  
33  
34 and 4) BC Perinatal Database Registry (BCPDR) - facilitated the linkage between mothers' and  
35  
36 babies' data. The BCPDR contains data abstracted from obstetrical and neonatal medical records on  
37  
38 nearly 100% of births in the province of BC from over 60 acute care facilities as well as births  
39  
40 occurring at home attended by BC registered midwives, including women who had pregnancies  
41  
42 ending in a live or still birth of at least 20 weeks gestation or 500 grams birth weight (17–20). Details  
43  
44 of these data sources are described in previous work (21) and databases and linkages are shown in  
45  
46  
47  
48  
49  
50  
51 Figure 1.  
52  
53  
54

### 55 Study cohort

1  
2  
3 The source population comprised of women in BC who had pregnancies ending in a live or still  
4 birth between January 1st, 2002 and December 31st, 2012, and were continuously covered by BC's  
5 provincial health plan for at least 12 months prior to the start of pregnancy and in the 12 months  
6 following delivery. This requirement of continuous insurance coverage ensures that we have  
7 complete data capture for all women and babies in our study population. We created a cohort of  
8 women from the source population who had a recorded diagnosis of one or more autoimmune  
9 diseases that could be treated with a biologic, including RA, IBD (Crohn's disease and ulcerative  
10 colitis), psoriasis (Ps)/PsA, AS, juvenile idiopathic arthritis, and systemic autoimmune rheumatic  
11 diseases. Women were considered to have been diagnosed with one of these conditions if they had  
12 the same International Classification of Diseases (ICD)-9<sup>th</sup> revision or 10<sup>th</sup> revision codes for a  
13 specific autoimmune disease from two separate physician visits that were at least 60 days apart and  
14 within two years, any time prior to the date of conception; or, having at least one hospitalization  
15 with an ICD-9/10 code for an autoimmune disease any time prior to the date of conception (21).  
16 Given that the unit of analysis was individual pregnancy, each pregnancy had to satisfy the above  
17 criteria in order to be included in the analyses. All singleton live born infants from these pregnancies  
18 were included in the analyses of infant serious infections.

### 41 Biologics exposure

42  
43 Using dispensation dates and Canadian Drug Identity Codes for biologics in PharmaNet linked with  
44 date of conception and date of delivery of each pregnancy in the BCPDR, exposure to biologics was  
45 identified in any woman in the autoimmune disease cohort with one or more prescriptions for a  
46 biologic anytime from the date of conception to the date of delivery (21). Infants born from these  
47 pregnancies were classified as being exposed to biologics in utero. Pregnancies that did not satisfy  
48 this criteria and infants born from those pregnancies were considered unexposed. All biologics  
49  
50  
51  
52  
53  
54  
55  
56  
57

1  
2  
3 available in BC for the treatment of autoimmune diseases of interest during the study period, along  
4  
5 with concomitant medications considered in this study, are listed in Supplementary Table S1.  
6  
7  
8  
9

### 10 Serious infections

11  
12 The outcomes of interest were serious infections requiring hospitalization during the post-partum  
13  
14 period in women, and serious infections requiring hospitalization anytime during the first year of life  
15  
16 in infants. Serious post-partum infections were defined as any episode of hospitalization, including  
17  
18 the delivery episode, with one or more ICD-9/10 codes for an infection anytime from the date of  
19  
20 delivery until 42 days post-partum – the conventional definition for post-partum period of concern  
21  
22 (22). Serious infections in infants were defined as any episode of hospitalization with one or more  
23  
24 ICD-9/10 codes for an infection anytime during the first year of life – due to the lengthy  
25  
26 accumulation of biologics in infant circulation – or until death, whichever occurred first. All  
27  
28 infections considered are listed in Supplementary Table S2.  
29  
30  
31  
32  
33  
34

### 35 Covariates

36  
37 All covariates considered were from the aforementioned data sources. Maternal factors included  
38  
39 characteristics of current pregnancy, prior obstetrical history, comorbidities, and medication use.  
40  
41 Characteristics of current pregnancy included maternal age at delivery (continuous), parity  
42  
43 (primiparous or multiparous), neighborhood income quintile (based on postal code) at baseline,  
44  
45 body mass index (BMI) at first antenatal visit (continuous; and categorical as underweight: <18.5,  
46  
47 normal: 18.5-24.9, overweight: 25-29.9, obese:  $\geq 30$  kg/m<sup>2</sup>), weight gain during pregnancy (binary,  
48  
49 based on guidelines for weight gain during pregnancy by BMI category (23)), number of antenatal  
50  
51 visits (continuous), and hospitalization at baseline (binary), and delivery by cesarean section (binary).  
52  
53  
54  
55 Prior obstetrical history included binary outcomes from previous pregnancies (if applicable)  
56  
57  
58  
59  
60

1  
2  
3 including premature delivery, spontaneous abortions, neonatal death, stillbirth, low birth weight, and  
4 congenital anomalies. Comorbidities considered included gestational hypertension, gestational  
5 diabetes, anxiety disorders, mood disorders, asthma, hypertension, and diabetes. Concomitant  
6 medications included DMARDs or immunosuppressants, glucocorticoids, antidepressants,  
7 anxiolytics, traditional and COX-2 non-steroidal anti-inflammatory drugs (NSAIDs). All maternal  
8 factors considered in analyses of post-partum infections in the mother that could be associated with  
9 serious infections in infants were also considered in analyses of this latter outcome in addition to  
10 infant characteristics. Infant characteristics included sex and Apgar scores at 1 minute, 5 minutes,  
11 and 10 minutes (continuous). Other infant characteristics including gestational age, birth weight, and  
12 presence of anomalies were considered but not included in the analysis as they may be possible  
13 mediators of the effect of exposure on serious infections in infants.  
14  
15  
16  
17  
18  
19  
20  
21  
22  
23  
24  
25  
26  
27  
28  
29

### 30 Statistical Analysis

31  
32 Using logistic regression models we calculated ORs with 95% CIs between maternal exposure to  
33 biologics during pregnancy and the risk of serious post-partum infections in women, and the risk of  
34 serious infant infections during the first year of life; first as unadjusted models, by treatment  
35 categories only (model 1) and then adjusted for maternal and infant characteristics according to  
36 respective outcome (model 2). Multivariable models were constructed using forward selection and  
37 covariates were included in the final models if they were associated with the exposure in bivariate  
38 analyses and resulted in lower Akaike Information Criterion upon inclusion. Multivariable regression  
39 analyses using generalized estimating equation models with logit link and clustered by mother could  
40 not be completed as models did not converge. However, previous work on a larger sample from our  
41 source population showed that accounting for correlations between multiple pregnancies within the  
42 same woman did not appreciably change effect estimates and confidence intervals (21).  
43  
44  
45  
46  
47  
48  
49  
50  
51  
52  
53  
54  
55  
56  
57  
58  
59  
60

1  
2  
3  
4  
5 As a sensitivity analysis, we estimated propensity for biologics exposure in each pregnancy using a  
6 high dimensional propensity score (HDPS) algorithm that incorporated investigator-specified  
7 covariates and additional factors that acted as proxy variables for unmeasured confounders from the  
8 four aforementioned data dimensions (model 3) (24). These variables included use of medications  
9 (e.g. DMARDs, glucocorticoids), comorbidities (e.g. depression), and healthcare utilization (e.g.  
10 outpatient visits, prenatal care, and tests and investigations. The HDPS was calculated using logistic  
11 regression then each biologic exposed pregnancy was matched with five unexposed pregnancies (1:5  
12 ratio) without replacement, based on HDPS, whereby an unexposed pregnancy may only be used  
13 once as a match. Match performance was evaluated by comparing the standardized mean differences  
14 in baseline characteristics of matched and unmatched cohorts. Odds ratios and 95% CIs for  
15 biologics exposure and serious post-partum infections, and serious infant infections were calculated  
16 using logistic regression in the HDPS-matched samples. All analyses were conducted using SAS  
17 statistical software v.9.3 (Cary, NC, USA).  
18  
19  
20  
21  
22  
23  
24  
25  
26  
27  
28  
29  
30  
31  
32  
33  
34  
35  
36

### 37 Study Conduct

38  
39 This study was approved by the University of British Columbia, Behavioural Research Ethics Board.  
40  
41 All inferences, opinions, and conclusions drawn in this manuscript are those of the authors, and do  
42 not reflect the opinions or policies of the data stewards. Due to data sharing agreements and  
43 confidentiality, cell sizes of less than five individuals are not reported.  
44  
45  
46  
47  
48  
49

### 50 Patient and Public Involvement

51  
52 Patients were not involved in the design, recruitment, or conduct of the study as this is a  
53 retrospective cohort study using population-wide administrative data.  
54  
55  
56  
57

## Results

In the cohort of 6,218 women with autoimmune inflammatory disease diagnoses and 8,607 singleton pregnancies, there were 90 women exposed to biologics during pregnancy, and 100 babies born to these women. As shown in Table 1, in the biologics exposed group, more women had IBD or RA, used at least one DMARD or glucocorticoid, or had mood disorders; whereas in the group not exposed to biologics during pregnancy, more women had Ps/PsA and were multiparous. Also shown in Table 1, infants from pregnancies that were unexposed to biologics had more advanced gestational age and higher birth weight.

Among women exposed to biologics during pregnancy, occurrence of serious post-partum infections were rare, ranging from 0 to 5%, depending on concomitant exposures to DMARDs or glucocorticoids (Figure 2). Serious infections that occurred in those exposed to biologics included infection of the amniotic sac and membranes, and bacterial puerperal infections. In model 1 looking only at drug exposures, we found no independent associations between the use of biologics (OR 0.88, 95%CI 0.27 to 2.82), DMARDs (OR 0.98, 95%CI 0.68 to 1.40), or glucocorticoids (OR 1.07, 95%CI 0.64 to 1.77), with the risk of serious post-partum infections (Table 2). The results were similar when maternal factors were included (model 2), specifically, the association between biologics exposure and serious post-partum infections had an adjusted OR [aOR] of 0.79 (95%CI 0.24 to 2.54), DMARD/ immunosuppressants had an aOR of 0.98 (95%CI 0.68 to 1.40), and glucocorticoids an aOR of 1.00 (95%CI 0.60 to 1.67) (Table 2). In this model, we also found several independent maternal factors that were significantly associated with either increased or decreased post-partum infections; having an anxiety diagnosis, more previous hospitalizations, higher BMI at conception, and delivering via Cesarean section were all factors that increased the risk of serious



1  
2  
3 infection; while being multiparous appeared protective. Results from sensitivity analysis using  
4  
5 HDPS-matching and logistic regression had higher uncertainty due to a wide confidence interval  
6  
7 (model 3).  
8  
9

10  
11  
12 In infants exposed to biologics in utero, proportion of serious infections ranged from 0 to 7%  
13  
14 depending on the treatment combination used by the mother during pregnancy (Figure 3). The types  
15  
16 of serious infections that occurred during infants' first year of life were lymphadenitis, urinary tract  
17  
18 infection, and acute bronchiolitis. In model 1 examining categories of maternal drug exposures only,  
19  
20 we found no increased risk of serious infections in infants who were exposed to biologics (OR 0.50,  
21  
22 95%CI 0.16 to 1.60), or DMARDs (OR 1.07, 95%CI 0.81 to 1.43) in utero, while glucocorticoids  
23  
24 exposure appeared to possibly increase risk (OR 1.46, 95%CI 1.00 to 2.12). When maternal and  
25  
26 infant factors were considered (model 2), the risk of serious infections associated with biologics  
27  
28 exposure had an aOR of 0.56 (95%CI 0.17 to 1.81), DMARD/immunosuppressants had an aOR of  
29  
30 1.09 (95%CI 0.81 to 1.45), and glucocorticoids an aOR of 1.13 (95%CI 0.77 to 1.66) (Table 3).  
31  
32  
33 However, we found several maternal factors associated with an increased risk of infections in  
34  
35 infants, including multiparity, maternal history of prior delivery resulting in a low birth weight infant,  
36  
37 or premature infant, maternal use of anxiolytics, and maternal asthma diagnosis (Table 3). Factors  
38  
39 associated with a lower risk of serious infections included being a female infant, having higher Apgar  
40  
41 score at 1 minute, higher neighborhood income, and more antenatal visits. Sensitivity analysis using  
42  
43 logistic regression in the HDPS-matched cohort did not change these results (model 3).  
44  
45  
46  
47  
48  
49

## 50 Discussion

51  
52 In this study using linked administrative health data and a perinatal registry for a population-based  
53  
54 cohort of women with autoimmune disease and their babies, we examined the association between  
55  
56  
57

1  
2  
3 exposure to biologics during pregnancy and risk of serious infections in mothers and infants,  
4  
5 respectively. Specifically for mothers, these were infections requiring hospitalization during the post-  
6  
7 partum period; and for infants, these were infections requiring hospitalization during their first year  
8  
9 of life. We found that the proportion of serious infections in all groups was low. Our findings  
10  
11 suggest that there was no difference in risk of serious post-partum infections in women who used  
12  
13 biologics during pregnancy versus those who did not. Similarly, we did not observe a difference in  
14  
15 risk of serious infections during the first year of life in infants born to mothers who used biologics  
16  
17 during pregnancy compared to those who did not. While we examined all biologics used in the  
18  
19 cohort, TNF-alpha inhibitor biologics (94%) were the most common, and as such our results mostly  
20  
21 apply to these biologics and less so to those that are not TNF-alpha inhibitors.  
22  
23  
24  
25  
26  
27

28 Indeed serious infections are a well-known safety outcome in patients using biologics to manage  
29  
30 their autoimmune diseases, and despite pregnant women and infants being vulnerable populations  
31  
32 there has been a dearth of evidence on this clinically important topic. One population-based study in  
33  
34 the United States by Desai et al. compared serious intrapartum infections among 776 users of  
35  
36 biologics compared to 1587 users of non-biologics and reported no meaningful increase risk of  
37  
38 serious infection during pregnancy (adjusted hazard ratio [aHR] 1.36, 95%CI 0.47 to 3.93) (25).  
39  
40 However, the authors did observe that the rate of infections increased noticeably in all treatment  
41  
42 groups as pregnancies approached term (25), thus, providing a rationale for the objective of our  
43  
44 study which examined the risk of infections around the time of childbirth, and post-partum. No  
45  
46 other studies to date have specifically investigated the association between biologics use and the risk  
47  
48 of post-partum infections despite the fact that post-partum infections account for up to 10% of  
49  
50 maternal deaths, and are a cause of short term morbidity and long term complications (26). It is  
51  
52  
53  
54  
55  
56  
57  
58  
59  
60

1  
2  
3 therefore reassuring that our study did not show an association between biologics use during  
4 pregnancy and maternal risk of post-partum infections.  
5  
6  
7  
8  
9

10 Infections is a theoretical concern in infants exposed to biologics in utero, due to evidence of  
11 accumulation of certain biologics in cord blood (10). The immunosuppressive effect of TNF-alpha  
12 inhibitor accumulation is illustrated by a fatal case of disseminated Bacillus Calmette–Guérin (BCG)  
13 infection after BCG vaccination in an infant born to a mother treated with infliximab throughout  
14 her pregnancy (27). The infant received a BCG vaccination at 3 months of age, subsequently became  
15 ill, and died at 4.5 months of age from disseminated infection (27). Current recommendations to  
16 stop some biologics in the third trimester are largely based on such case reports and expert opinion  
17 (28). To date, there have only been two published abstracts examining the association of biologics  
18 exposure and risk of serious infections in infants. Using data collected by the Organization of  
19 Teratology Information Specialists (OTIS), Chambers et al. found similar proportions of serious  
20 infections during the first year of life in infants born to women with RA using biologics during  
21 pregnancy (2.8%), compared to those born to women with RA not treated with a biologic (3.9%),  
22 with a relative risk of 0.71 (95%CI 0.30 to 1.71) (29). In a registry of women with IBD, Chaparro et  
23 al. found that after a median follow up of 33 months post-partum, similarly, infants exposed to  
24 biologics in utero were not at greater risk of serious infections (HR 0.5, 95%CI 0.2 to 1.3) (30). Our  
25 study is the first to corroborate these results using population-based data.  
26  
27  
28  
29  
30  
31  
32  
33  
34  
35  
36  
37  
38  
39  
40  
41  
42  
43  
44  
45  
46  
47

48 This study has a number of strengths and limitations. The use of population-wide databases with  
49 high coverage lends this study greater generalizability; linkages between databases containing valid  
50 information on all dispensed prescriptions (PharmaNet) and antenatal, intrapartum, and postpartum  
51 maternal and infant information (BCPDR) provides the ability to accurately determine the timing of  
52  
53  
54  
55  
56  
57  
58  
59  
60

1  
2  
3 all medication dispensations with respect to conception dates. Linkages between maternal and infant  
4 data allows for ascertainment of infant exposure status in utero. Altogether, these strengths  
5 minimize potential biases caused by problems such as selection bias, patient recall bias, reporting  
6 bias, and exposure misclassification.  
7  
8  
9  
10

11  
12  
13  
14 The main limitation of our study stems from the uncertainty of risk estimates attributable to the  
15 relatively small sample size of the exposed, as such, a doubling to tripling in the risk of serious  
16 infections remains compatible with the upper bound of the confidence intervals of our estimates.  
17  
18 With respect to exposure, while prescription dispensations does not necessarily equate to medication  
19 use, research by the EuroMAP Group has shown that pregnant women report taking 43-50% of  
20 their prescribed medications, a level of medication adherence consistent with non-pregnant  
21 populations, and that adherence tends to be higher (70–100%) for drugs used in the treatment of  
22 chronic diseases in this population (31). Our previous studies have shown that the proportion of  
23 women discontinuing their biologic became more prevalent as pregnancy progressed resulting in  
24 fewer women being exposed close to delivery, which could be an explanation for the low numbers  
25 of outcomes observed (21). Also due to the rare occurrence of the outcomes of interest, subgroup  
26 analyses of specific biologics, or specific autoimmune disease types were not possible. Other  
27 limitations included potential misclassification of the outcome, as a code for an infection could have  
28 been in any diagnostic field in the discharge abstract data and may not have been the primary reason  
29 for hospitalization. Furthermore, we could not obtain any data on breastfeeding practices which has  
30 been shown to be protective against infections requiring hospitalizations (32), other potentially  
31 important factors that were unavailable included maternal smoking status and alcohol or other  
32 substance use. However, our findings of other factors independently associated with serious  
33 infections, such as maternal BMI (33), Cesarean section delivery (34,35), infant gender (36), and  
34  
35  
36  
37  
38  
39  
40  
41  
42  
43  
44  
45  
46  
47  
48  
49  
50  
51  
52  
53  
54  
55  
56  
57

1  
2  
3 maternal asthma diagnosis (37), are consistent with that reported in literature and thus lend validity  
4  
5 to our results. Finally, although we used HDPS approaches in sensitivity analyses to address  
6  
7 confounding by indication, an inherent limitation of administrative data, such as those used in our  
8  
9 study, is that they do not provide clinical information to allow assessment of disease severity.  
10  
11  
12  
13

14 In conclusion, from this population-based cohort we did not observe differences in the risk of  
15  
16 serious infections in women using or not using TNF-alpha inhibitor biologics during pregnancies or  
17  
18 in their offspring during the first year of life. Our findings are compatible with current  
19  
20 recommendations where discontinuation of TNF-alpha inhibitor biologics late in the pregnancy  
21  
22 could be considered, or if indicated, can be continued throughout the pregnancy (28,38). Our study  
23  
24 provides information for clinicians and women with autoimmune diseases regarding the risks of  
25  
26 serious infections when using biologics during pregnancy.  
27  
28  
29  
30  
31

### 32 **Author Statement**

33  
34 Dr. Tsao had full access to all the data used in this study and takes responsibility for the integrity of  
35  
36 the data and accuracy of data analysis. As the lead author, Dr. Tsao affirms that this manuscript is an  
37  
38 honest, accurate, and transparent account of the study being reported; that no important aspects of  
39  
40 the study have been omitted; and that any discrepancies from the study as planned (and, if relevant,  
41  
42 registered) have been explained. Contributions of authors to this study are as follows, for concept  
43  
44 and design: De Vera, Tsao; acquisition, analysis, and interpretation of data: De Vera, Tsao, Sayre;  
45  
46 drafting of manuscript: Tsao, De Vera; critical revision of manuscript for important intellectual  
47  
48 content: Tsao, De Vera, Sadatsafavi, Hanley, Lynd; statistical analysis: Tsao, Sayre; obtained funding:  
49  
50 De Vera. Dr. Lynd has received honoraria from Boehringer Ingelheim and Pfizer Canada for  
51  
52 consulting services unrelated to this study, all other authors have declared no support from any  
53  
54  
55  
56  
57  
58  
59  
60

1  
2  
3 organisation for the submitted work; no financial relationships with any organisations that might  
4  
5 have an interest in the submitted work in the previous three years, no other relationships or activities  
6  
7 that could appear to have influenced the submitted work.  
8  
9  
10

### 11 **Data Sharing Statement**

12  
13  
14 Due to privacy agreements, data used in this study cannot be shared.  
15  
16

### 17 **Acknowledgements**

18  
19 The authors would like to thank Dr. Jeremy Rassen for his help in implementing the high-  
20  
21 dimensional propensity score program.  
22  
23  
24  
25

### 26 **Conflicts of Interest**

27  
28 Dr. Larry Lynd has received honoraria from Boehringer Ingelheim and Pfizer Canada for consulting  
29  
30 services unrelated to this study. All other authors have declared no support from any organization  
31  
32 for the submitted work.  
33  
34  
35  
36  
37  
38  
39  
40  
41  
42  
43  
44  
45  
46  
47  
48  
49  
50  
51  
52  
53  
54  
55  
56  
57

## References

1. Rosman Z, Shoenfeld Y, Zandman-Goddard G. Biologic therapy for autoimmune diseases: an update. *BMC Med*. 2013 Apr 4;11(1):88.
2. Tiligada E, Ishii M, Riccardi C, Spedding M, Simon H-U, Teixeira MM, et al. The expanding role of immunopharmacology – IUPHAR Review 16. *Br J Pharmacol* [Internet]. 2015 Aug 1 [cited 2015 Jul 31]; Available from: <http://onlinelibrary.wiley.com/doi/10.1111/bph.13219/abstract>
3. Scott DL. Biologics-Based Therapy for the Treatment of Rheumatoid Arthritis. *Clin Pharmacol Ther*. 2012 Jan 1;91(1):30–43.
4. Singh JA, Cameron C, Noorbaloochi S, Cullis T, Tucker M, Christensen R, et al. Risk of serious infection in biological treatment of patients with rheumatoid arthritis: a systematic review and meta-analysis. *The Lancet*. 2015 Jul 24;386(9990):258–65.
5. Brambell FW. The transmission of immunity from mother to young and the catabolism of immunoglobulins. *Lancet Lond Engl*. 1966 Nov 19;2(7473):1087–93.
6. Wood GW, Bjerrum K, Johnson B. Detection of IgG bound within human trophoblast. *J Immunol*. 1982 Oct 1;129(4):1479–84.
7. Kane SV, Acquah LA. Placental Transport of Immunoglobulins: A Clinical Review for Gastroenterologists Who Prescribe Therapeutic Monoclonal Antibodies to Women During Conception and Pregnancy. *Am J Gastroenterol*. 2009 Jan 1;104(1):228–33.
8. Junghans RP, Anderson CL. The protection receptor for IgG catabolism is the beta2-microglobulin-containing neonatal intestinal transport receptor. *Proc Natl Acad Sci U S A*. 1996 May 28;93(11):5512–6.
9. Porter C, Armstrong-Fisher S, Kopotsha T, Smith B, Baker T, Kevorkian L, et al. Certolizumab pegol does not bind the neonatal Fc receptor (FcRn): Consequences for FcRn-mediated in vitro transcytosis and ex vivo human placental transfer. *J Reprod Immunol*. 2016;116:7–12.
10. Soh MC, Nelson-Piercy C. High-risk pregnancy and the rheumatologist. *Rheumatol Oxf Engl*. 2015 Apr;54(4):572–87.
11. Vasilias EA, Church JA, Silverman N, Barry M, Targan SR, Dubinsky MC. Case report: evidence for transplacental transfer of maternally administered infliximab to the newborn. *Clin Gastroenterol Hepatol Off Clin Pract J Am Gastroenterol Assoc*. 2006 Oct;4(10):1255–8.
12. Vinet E, Pineau C, Gordon C, Clarke AE, Bernatsky S. Biologic therapy and pregnancy outcomes in women with rheumatic diseases. *Arthritis Rheum*. 2009 May 15;61(5):587–92.
13. Population Data BC. Population Data BC: Data Linkage [Internet]. 2016 [cited 2017 Mar 13]. Available from: <https://www.popdata.bc.ca/datalinkage>



- 1  
2  
3 14. British Columbia Ministry of Health (2013): Medical Services Plan (MSP) Payment Information  
4 File. [Internet]. Population Data BC. Data Extract. MOH. 2014. Available from:  
5 <http://www.popdata.bc.ca/data>  
6
- 7  
8 15. Canadian Institute for Health Information (2013): Discharge Abstract Database (Hospital  
9 Separations). [Internet]. Population Data BC. Data Extract. MOH. 2014. Available from:  
10 <http://www.popdata.bc.ca/data>  
11
- 12 16. BC Ministry of Health (2013): PharmaNet. [Internet]. BC Ministry of Health. Data Extract.  
13 Data Stewardship Committee. 2014. Available from: <http://www.popdata.bc.ca/data>  
14
- 15 17. BC Vital Statistics Agency (2012): Vital Statistics Births. [Internet]. Population Data BC. Data  
16 Extract. BC Vital Statistics Agency. 2014. Available from: <http://www.popdata.bc.ca/data>  
17
- 18 18. BC Vital Statistics Agency (2012): Vital Statistics Stillbirths. [Internet]. Population Data BC.  
19 Data Extract. BC Vital Statistics Agency. 2014. Available from:  
20 <http://www.popdata.bc.ca/data>  
21
- 22 19. BC Vital Statistics Agency (2013): Vital Statistics Deaths. [Internet]. Population Data BC. Data  
23 Extract. BC Vital Statistics Agency. 2014. Available from: <http://www.popdata.bc.ca/data>  
24
- 25 20. Perinatal Services BC (2012): British Columbia Perinatal Data Registry [Internet]. Population  
26 Data BC. Data Extract. PSBC. 2014. Available from:  
27 [http://www.perinataleservicesbc.ca/health-professionals/data-surveillance/perinatal-data-](http://www.perinataleservicesbc.ca/health-professionals/data-surveillance/perinatal-data-registry)  
28 [registry](http://www.perinataleservicesbc.ca/health-professionals/data-surveillance/perinatal-data-registry)  
29
- 30 21. Tsao NW, Lynd LD, Sadatsafavi M, Hanley G, De Vera MA. Patterns of biologics utilization  
31 and discontinuation before and during pregnancy in women with autoimmune diseases: A  
32 population-based cohort study. *Arthritis Care Res.* 2018 Jul;70(7):979–86.  
33
- 34 22. Romano M, Cacciatore A, Giordano R, La Rosa B. Postpartum period: three distinct but  
35 continuous phases. *J Prenat Med.* 2010;4(2):22–5.  
36
- 37 23. Rasmussen KM, Catalano PM, Yaktine AL. New guidelines for weight gain during pregnancy:  
38 what obstetrician/gynecologists should know. *Curr Opin Obstet Gynecol.* 2009  
39 Dec;21(6):521–6.  
40
- 41 24. Schneeweiss S, Rassen JA, Glynn RJ, Avorn J, Mogun H, Brookhart MA. High-dimensional  
42 propensity score adjustment in studies of treatment effects using health care claims data.  
43 *Epidemiol Camb Mass.* 2009 Jul;20(4):512–22.  
44
- 45 25. Desai RJ, Bateman BT, Huybrechts KF, Paterno E, Hernandez-Diaz S, Park Y, et al. Risk of  
46 serious infections associated with use of immunosuppressive agents in pregnant women with  
47 autoimmune inflammatory conditions: cohort study. *BMJ.* 2017 Mar 6;356:j895.  
48
- 49 26. Bonet M, Oladapo OT, Khan DN, Mathai M, Gülmezoglu AM. New WHO guidance on  
50 prevention and treatment of maternal peripartum infections. *Lancet Glob Health.* 2015 Nov  
51 1;3(11):e667–8.  
52  
53  
54  
55  
56  
57  
58  
59  
60



- 1
  - 2
  - 3
  - 4
  - 5
  - 6
  - 7
  - 8
  - 9
  - 10
  - 11
  - 12
  - 13
  - 14
  - 15
  - 16
  - 17
  - 18
  - 19
  - 20
  - 21
  - 22
  - 23
  - 24
  - 25
  - 26
  - 27
  - 28
  - 29
  - 30
  - 31
  - 32
  - 33
  - 34
  - 35
  - 36
  - 37
  - 38
  - 39
  - 40
  - 41
  - 42
  - 43
  - 44
  - 45
  - 46
  - 47
  - 48
  - 49
  - 50
  - 51
  - 52
  - 53
  - 54
  - 55
  - 56
  - 57
  - 58
  - 59
  - 60
27. Cheent K, Nolan J, Shariq S, Kiho L, Pal A, Arnold J. Case Report: Fatal case of disseminated BCG infection in an infant born to a mother taking infliximab for Crohn's disease. *J Crohns Colitis*. 2010 Nov;4(5):603–5.
28. Flint J, Panchal S, Hurrell A, Venne M van de, Gayed M, Schreiber K, et al. BSR and BHPR guideline on prescribing drugs in pregnancy and breastfeeding—Part I: standard and biologic disease modifying anti-rheumatic drugs and corticosteroids. *Rheumatology*. 2016 Sep 1;55(9):1693–7.
29. Chambers, CD, Johnson, DL, Luo, Y, Xu, R, Jones, KL. Serious or opportunistic infections in infants born to pregnant women with rheumatoid arthritis and treated with a biologic medication. American College of Rheumatology Annual Meeting; 2017 Sep 18; San Diego, CA.
30. Chaparro, M, Magro, F, Savarino, E, Zabana, Y, Pugliese, D, Bar-Gil Shitrit, A, et al. Long-term safety of in utero exposure to anti-TNF alpha drugs for the treatment of inflammatory bowel diseases (IBD): Interim results of the TEDDY study. 11th Congr Eur Crohns Colitis Organ. :S415.
31. Olesen C, Søndergaard C, Thrane N, Lauge Nielsen G, de Jong-van den Berg L, Olsen J, et al. Do Pregnant Women Report Use of Dispensed Medications? *Epidemiology*. 2001 Sep;12(5):497.
32. Størdal K, Lundeby KM, Brantsæter AL, Haugen M, Nakstad B, Lund-Blix NA, et al. Breast-feeding and Infant Hospitalization for Infections: Large Cohort and Sibling Analysis. *J Pediatr Gastroenterol Nutr*. 2017 Aug;65(2):225–31.
33. Axelsson D, Brynhildsen J, Blomberg M. Postpartum infection in relation to maternal characteristics, obstetric interventions and complications. *J Perinat Med*. 2018 Apr 25;46(3):271–8.
34. Gibbs RS. Clinical risk factors for puerperal infection. *Obstet Gynecol*. 1980 May;55(5 Suppl):178S-184S.
35. Yokoe DS, Christiansen CL, Johnson R, Sands KE, Livingston J, Shtatland ES, et al. Epidemiology of and surveillance for postpartum infections. *Emerg Infect Dis*. 2001;7(5):837–41.
36. Muenchhoff M, Goulder PJR. Sex Differences in Pediatric Infectious Diseases. *J Infect Dis*. 2014 Jul 15;209(Suppl 3):S120–6.
37. Carroll KN, Gebretsadik T, Minton P, Woodward K, Liu Z, Miller EK, et al. Influence of maternal asthma on etiology and severity of infant acute respiratory infection. *J Allergy Clin Immunol*. 2012 May;129(5):1236–42.
38. Skorpen CG, Hoeltzenbein M, Tincani A, Fischer-Betz R, Elefant E, Chambers C, et al. The EULAR points to consider for use of antirheumatic drugs before pregnancy, and during pregnancy and lactation. *Ann Rheum Dis*. 2016 May;75(5):795–810.

1  
2  
3 **Tables and Figures**  
4

5 **Figure 1. Schematic diagram of databases and linkages facilitating study analyses**  
6  
7  
8  
9  
10  
11  
12  
13  
14  
15  
16  
17  
18  
19  
20  
21  
22  
23  
24  
25  
26  
27  
28  
29  
30  
31  
32  
33  
34  
35  
36  
37  
38  
39  
40  
41  
42  
43  
44  
45  
46  
47  
48  
49  
50  
51  
52  
53  
54  
55  
56  
57  
58  
59  
60

For peer review only

**Table 1. Characteristics of moms and infants in pregnancies exposed and unexposed to biologics**

| Maternal Characteristics              | Biologic exposed | Biologic unexposed | p-value |
|---------------------------------------|------------------|--------------------|---------|
| <b>Current pregnancy</b>              |                  |                    |         |
| Maternal age at delivery (mean (SD))  | 31.0 (4.7)       | 31.2 (5.2)         | 0.657   |
| Multiparous                           | 44 (44%)         | 4998 (59%)         | 0.003   |
| Antenatal visits (mean (SD))          | 8.9 (3.6)        | 9.0 (3.9)          | 0.749   |
| Gestational hypertension              | 5 (5%)           | 647 (8%)           | 0.328   |
| Gestational diabetes                  | 12 (12%)         | 669 (8%)           | 0.128   |
| Delivery via Cesarean section         | 40 (40%)         | 2849 (33%)         | 0.171   |
| <b>Neighbourhood income quintiles</b> |                  |                    |         |
| 5 <sup>th</sup> percentile            | 21 (21%)         | 1763 (21%)         | 0.836   |
| 25 <sup>th</sup> percentile           | 24 (24%)         | 1699 (20%)         |         |
| Median (50 <sup>th</sup> percentile)  | 17 (17%)         | 1845 (22%)         |         |
| 75 <sup>th</sup> percentile           | 22 (22%)         | 1803 (21%)         |         |
| 95 <sup>th</sup> percentile           | 16 (16%)         | 1397 (16%)         |         |
| Hospitalization at baseline           | 99 (99%)         | 8412 (99%)         | 0.912   |
| BMI at baseline (mean (SD))           | 24.7 (4.6)       | 24.6 (4.5)         | 0.867   |
| <b>BMI categories</b>                 |                  |                    |         |
| Obese                                 | 9 (9%)           | 851 (10%)          | 0.979   |
| Overweight                            | 15 (15%)         | 1342 (16%)         |         |
| <b>Prior obstetrical history</b>      |                  |                    |         |
| Premature delivery                    | 5 (5%)           | 500 (6%)           | 0.711   |
| Spontaneous abortion                  | 28 (28%)         | 2230 (26%)         | 0.686   |
| Delivery with neonatal death          | <5 <sup>†</sup>  | 52 (0.6%)          | 0.621   |
| Stillbirth                            | <5 <sup>†</sup>  | 103 (1%)           | 0.107   |
| Low birth weight infant               | 5 (5%)           | 243 (3%)           | 0.203   |
| Infant with anomalies                 | 0 (0%)           | 74 (1%)            | 0.349   |
| <b>Autoimmune disease type*</b>       |                  |                    |         |
| Inflammatory bowel disease            | 50 (50%)         | 2471 (29%)         | <0.001  |
| Rheumatoid arthritis                  | 44 (44%)         | 1756 (21%)         | <0.001  |
| Psoriasis/psoriatic arthritis         | 16 (16%)         | 3441 (40%)         | <0.001  |
| Juvenile idiopathic arthritis         | 8 (8%)           | 93 (1%)            | <0.001  |

|                                        |                         |                           |        |
|----------------------------------------|-------------------------|---------------------------|--------|
| Systemic autoimmune rheumatic diseases | 5 (5%)                  | 1063 (12%)                | 0.024  |
| Ankylosing spondylitis                 | 5 (5%)                  | 417 (5%)                  | 0.964  |
| <b>Biologics<sup>‡</sup></b>           |                         |                           |        |
| Infliximab                             | 54 (54%)                |                           |        |
| Etanercept                             | 41 (41%)                |                           |        |
| Adalimumab                             | 39 (39%)                |                           |        |
| Other biologic <sup>**</sup>           | 18 (18%)                |                           |        |
| <b>Concomitant medications</b>         |                         |                           |        |
| DMARDs                                 | 53 (53%)                | 1843 (22%)                | <0.001 |
| Glucocorticoids                        | 54 (54%)                | 1065 (13%)                | <0.001 |
| Traditional NSAIDs                     | 16 (16%)                | 941 (11%)                 | 0.118  |
| Antidepressants                        | 16 (16%)                | 783 (9%)                  | 0.020  |
| Anxiolytics                            | <5 <sup>†</sup>         | 394 (5%)                  | 0.765  |
| COX2 NSAIDs                            | <5 <sup>†</sup>         | 56 (0.7%)                 | <0.001 |
| <b>Comorbidities</b>                   |                         |                           |        |
| Anxiety                                | 19 (19%)                | 1368 (16%)                | 0.430  |
| Mood disorders                         | 10 (10%)                | 432 (5%)                  | 0.027  |
| Asthma                                 | <5 <sup>†</sup>         | 154 (2%)                  | 0.888  |
| Diabetes                               | <5 <sup>†</sup>         | 563 (6.6%)                | 0.294  |
| Hypertension                           | 6 (6%)                  | 975 (11.5%)               | 0.088  |
| <b>Infant Characteristics</b>          | <b>Biologic exposed</b> | <b>Biologic unexposed</b> |        |
| Female sex                             | 55 (55%)                | 4159 (49%)                | 0.224  |
| Gestational age (mean (SD))            | 37.8 weeks (2.4)        | 38.4 weeks (2.2)          | 0.004  |
| Birth weight (mean (SD))               | 3158 grams (634)        | 3385 grams (204)          | <0.001 |
| Apgar score at 1 minute (mean (SD))    | 8.1 (1.6)               | 8.0 (1.7)                 | 0.730  |
| Apgar score at 5 minutes (mean (SD))   | 8.9 (1.1)               | 9.0 (1.0)                 | 0.595  |

SD = standard deviation, BMI = body mass index, DMARDs = disease modifying anti-rheumatic drugs, NSAIDs = non-steroidal anti-inflammatory drugs, COX = cyclooxygenase

\*Sum of percentages exceed 100% due to some individuals having more than one diagnosis

<sup>†</sup>All cell sizes <5 are suppressed due to privacy restrictions of data sharing agreements

<sup>‡</sup>Sum of percentages exceed 100% due to some pregnancies being exposed to more than one drug

\*\*Other biologics include: abatacept, alefacept, certolizumab pegol, golimumab, rituximab, tocilizumab, and ustekinumab

††p-values based on t-tests or Chi-square tests

1  
2  
3  
4  
5  
6  
7  
8  
9  
10  
11  
12  
13  
14  
15  
16  
17  
18  
19  
20  
21  
22  
23  
24  
25  
26  
27  
28  
29  
30  
31  
32  
33  
34  
35  
36  
37  
38  
39  
40  
41  
42  
43  
44  
45  
46  
47  
48  
49  
50  
51  
52  
53  
54  
55  
56  
57  
58  
59  
60

For peer review only

1  
2  
3 **Figure 2. Rates of maternal post-partum serious infections based on drug exposure**  
4 **categories**  
5  
6  
7  
8  
9  
10  
11  
12  
13  
14  
15  
16  
17  
18  
19  
20  
21  
22  
23  
24  
25  
26  
27  
28  
29  
30  
31  
32  
33  
34  
35  
36  
37  
38  
39  
40  
41  
42  
43  
44  
45  
46  
47  
48  
49  
50  
51  
52  
53  
54  
55  
56  
57  
58  
59  
60

For peer review only

1  
2  
3  
4  
5  
6  
7  
8  
9  
10  
11  
12  
13  
14  
15  
16  
17  
18  
19  
20  
21  
22  
23  
24  
25  
26  
27  
28  
29  
30  
31  
32  
33  
34  
35  
36  
37  
38  
39  
40  
41  
42  
43  
44  
45  
46  
47  
48  
49  
50  
51  
52  
53  
54  
55  
56  
57  
58  
59  
60

**Figure 3. Rates of infant serious infections during the first year of life based on in utero drug exposure categories**

For peer review only

**Table 2. Risk of serious maternal post-partum infections associated with biologics exposure during pregnancy**

|                            |                           | Maternal serious infections |
|----------------------------|---------------------------|-----------------------------|
|                            | Parameter                 | OR (95% CI)                 |
| <b>Unadjusted</b>          | Biologics                 | 0.90 (0.28 to 2.84)         |
| <b>Model 1</b>             | Biologics                 | 0.88 (0.27 to 2.82)         |
|                            | DMARDs/immunosuppressants | 0.98 (0.68 to 1.40)         |
|                            | Glucocorticoids           | 1.07 (0.64 to 1.77)         |
| <b>Model 2</b>             | Biologics                 | 0.79 (0.24 to 2.54)         |
|                            | DMARDs/immunosuppressants | 0.98 (0.68 to 1.40)         |
|                            | Glucocorticoids           | 1.00 (0.60 to 1.67)         |
|                            | Multiparity               | 0.60 (0.47 to 0.76)         |
|                            | Anxiety                   | 1.36 (1.02 to 1.82)         |
|                            | Prior hospital admissions | 1.19 (1.06 to 1.34)         |
|                            | BMI at baseline           | 1.02 (1.00 to 1.05)         |
| <b>Model 3</b>             | Cesarean section delivery | 2.01 (1.58 to 2.55)         |
|                            | Biologics                 | 1.16 (0.34 to 4.14)         |
| <b>HDPS-matched cohort</b> |                           |                             |

OR = odds ratio, HDPS = high-dimensional propensity score, DMARDs = disease modifying anti-rheumatic drugs, BMI = body mass index



**Table 3. Risk of serious infant infections during the first year of life associated with biologics exposure in utero**

|                                            |                                         | Infant serious infections |
|--------------------------------------------|-----------------------------------------|---------------------------|
|                                            | Parameter                               | OR (95% CI)               |
| <b>Unadjusted</b>                          | Biologics                               | 0.58 (0.18 to 1.85)       |
| <b>Model 1</b>                             | Biologics                               | 0.50 (0.16 to 1.60)       |
|                                            | DMARDs/immunosuppressants               | 1.07 (0.81 to 1.43)       |
|                                            | Glucocorticoids                         | 1.46 (1.00 to 2.12)       |
| <b>Model 2</b>                             | Biologics                               | 0.56 (0.17 to 1.81)       |
|                                            | DMARDs/immunosuppressants               | 1.09 (0.81 to 1.45)       |
|                                            | Glucocorticoids                         | 1.13 (0.77 to 1.66)       |
|                                            | Female sex                              | 0.73 (0.60 to 0.89)       |
|                                            | Multiparity                             | 1.56 (1.25 to 1.95)       |
|                                            | Maternal antenatal visits               | 0.97 (0.94 to 0.99)       |
|                                            | Prior delivery with anomaly             | 2.04 (0.98 to 4.26)       |
|                                            | Prior delivery with low birth weight    | 1.67 (1.05 to 2.64)       |
|                                            | Prior premature delivery                | 1.73 (1.21 to 2.47)       |
|                                            | Maternal anti-depressant use            | 1.30 (0.97 to 1.75)       |
|                                            | Maternal anxiolytics use                | 1.66 (1.15 to 2.40)       |
|                                            | Maternal rheumatoid arthritis diagnosis | 1.17 (0.93 to 1.47)       |
|                                            | Maternal asthma diagnosis               | 2.00 (1.18 to 3.39)       |
|                                            | Apgar score at 1 minute                 | 0.87 (0.83 to 0.92)       |
|                                            | Neighbourhood income quintile           | 0.91 (0.85 to 0.98)       |
| <b>Model 3<br/>HDPS-matched<br/>cohort</b> | Biologics                               | 0.49 (0.15 to 1.62)       |

OR = odds ratio, HDPS = high-dimensional propensity score, DMARDs = disease modifying anti-rheumatic drugs

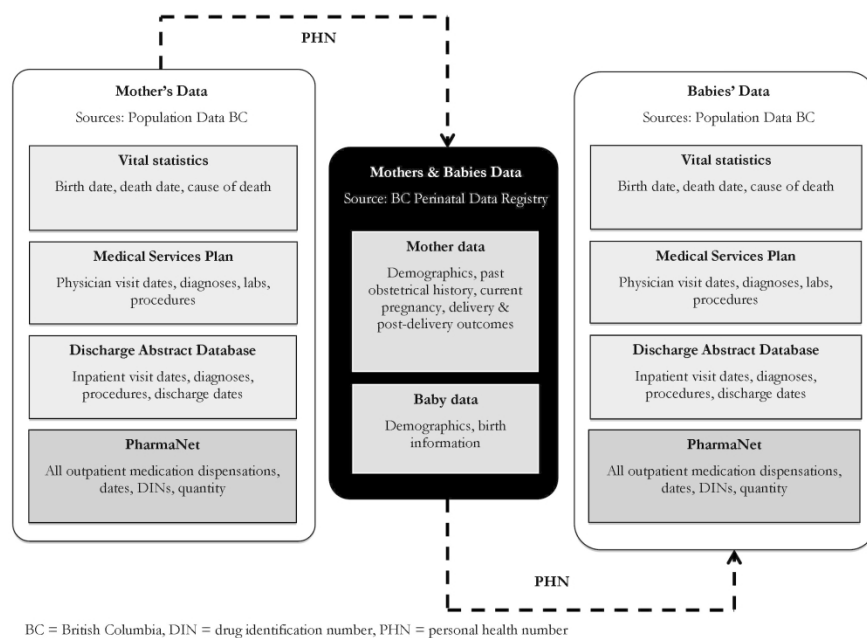

Figure 1. Schematic diagram of databases and linkages facilitating study analyses

215x279mm (300 x 300 DPI)

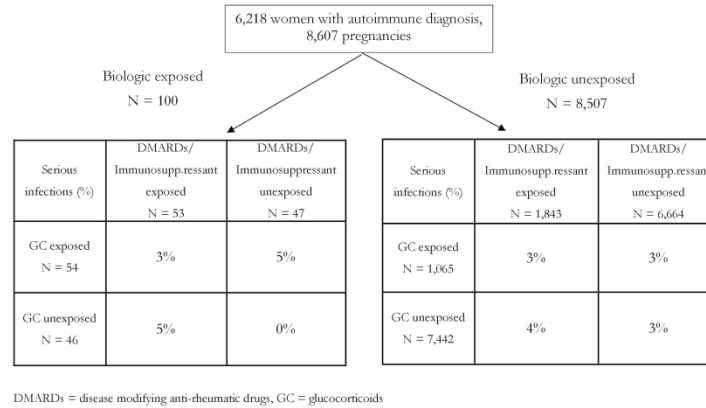

Figure 2. Rates of maternal post-partum serious infections based on drug exposure categories

279x215mm (300 x 300 DPI)

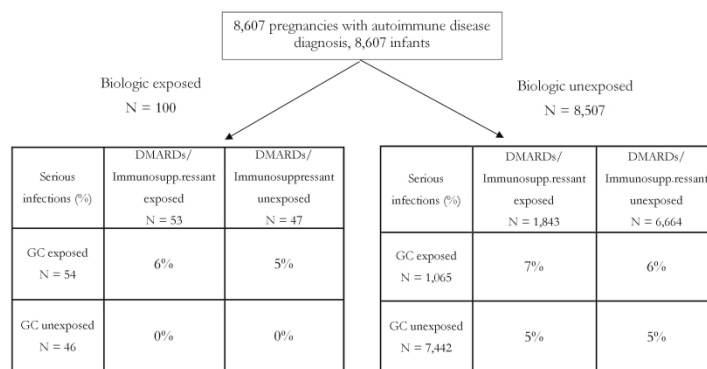

DMARDs = disease modifying anti-rheumatic drugs, GC = glucocorticoids

Figure 3. Rates of infant serious infections during the first year of life based on in utero drug exposure categories

279x215mm (300 x 300 DPI)

## Supplementary Materials

**Table S1. List of biologics, disease-modifying agents, immunosuppressive agents, and corticosteroids considered for inclusion**

|                                                |                                                                                                                                                                                                          |
|------------------------------------------------|----------------------------------------------------------------------------------------------------------------------------------------------------------------------------------------------------------|
| Biologics                                      | abatacept, adalimumab, alefacept, anakinra, belimumab, certolizumab pegol, etanercept, golimumab, infliximab, natalizumab, rituximab, tocilizumab, and ustekinumab.                                      |
| Disease-modifying and immunosuppressive agents | 5-aminosalicylic acid, 6-mercaptopurine, apremilast, azathioprine, cyclophosphamide, cyclosporine, hydroxychloroquine, leflunomide, methotrexate, minocycline, mycophenolate mofetil, and sulfasalazine. |
| Corticosteroids*                               | Betamethasone, cortisone, dexamethasone, hydrocortisone, methylprednisolone, prednisone, prednisolone, and triamcinolone.                                                                                |

\* Only systemically administered agents included, excluded if route of administration is topical

**Table S2. Infections and corresponding ICD-9 and -10 codes for outcomes ascertainment**

| Infection types                                                                                                                                                                                                                                                                                                          | ICD-9 Codes                                                             | ICD-10 codes                                                          |
|--------------------------------------------------------------------------------------------------------------------------------------------------------------------------------------------------------------------------------------------------------------------------------------------------------------------------|-------------------------------------------------------------------------|-----------------------------------------------------------------------|
| Respiratory infections (acute respiratory infections, pneumonia, influenza)                                                                                                                                                                                                                                              | 460-466; 480-488                                                        | J00-J06, J09-J18, J20-J22                                             |
| Urogenital infections (cystitis, urethritis [not sexually transmitted], kidney infections, prostatitis, orchitis, epididymitis, vaginitis, other infections originating in the perinatal period)                                                                                                                         | 590, 597, 599, 601.0-601.4, 604, 616.1-616.4, 647, 670, 760.2, 771      | N30, N34, N37.0, N39.0, N41.0, N41.3, N45, N76.0, N76.2, N77, P35-P39 |
| Skin and soft tissue infections (cellulitis, impetigo, herpes virus, varicella zoster virus)                                                                                                                                                                                                                             | 680-686, 053, 054                                                       | L00-L08                                                               |
| Obstetrics-related infections* (infection of amniotic cavity, major puerperal infxn, inflammatory disease of uterus, unspec inflammatory disease of uterus, infxn of GU tract in pregnancy, maternal pyrexia during labour, generalized infxn during labour, pyrexia unknown during puerperium, septicemia, other infxn) | 658.4, 670.0, 615.0, 615.9, 646.6, 659.2, 659.3, 672.0, 038, 999.3, 041 | O41.1, O85.x, O86.x, N71.0, N71.9, O23.x, O75.2, O75.3, A40, A41      |

\*Applied to maternal infections analyses only

## STROBE Statement—checklist of items that should be included in reports of observational studies

|                              | Item No | Recommendation                                                                                                                                                                             | Page numbers                                               |
|------------------------------|---------|--------------------------------------------------------------------------------------------------------------------------------------------------------------------------------------------|------------------------------------------------------------|
| <b>Title and abstract</b>    | 1 ✓     | (a) Indicate the study's design with a commonly used term in the title or the abstract                                                                                                     | Page 1, title                                              |
|                              | ✓       | (b) Provide in the abstract an informative and balanced summary of what was done and what was found                                                                                        | Page 3, abstract                                           |
| <b>Introduction</b>          |         |                                                                                                                                                                                            |                                                            |
| Background/rationale         | 2 ✓     | Explain the scientific background and rationale for the investigation being reported                                                                                                       | Page 6                                                     |
| Objectives                   | 3 ✓     | State specific objectives, including any prespecified hypotheses                                                                                                                           | Page 7, top                                                |
| <b>Methods</b>               |         |                                                                                                                                                                                            |                                                            |
| Study design                 | 4 ✓     | Present key elements of study design early in the paper                                                                                                                                    | Page 3, abstract; Pages 7-10, methods                      |
| Setting                      | 5 ✓     | Describe the setting, locations, and relevant dates, including periods of recruitment, exposure, follow-up, and data collection                                                            | Pages 7, 8, data sources and study cohort                  |
| Participants                 | 6 ✓     | (a) <i>Cohort study</i> —Give the eligibility criteria, and the sources and methods of selection of participants. Describe methods of follow-up                                            | Page 8, study cohort and exposure definition               |
|                              |         | <i>Case-control study</i> —Give the eligibility criteria, and the sources and methods of case ascertainment and control selection. Give the rationale for the choice of cases and controls |                                                            |
|                              |         | <i>Cross-sectional study</i> —Give the eligibility criteria, and the sources and methods of selection of participants                                                                      |                                                            |
|                              |         | (b) <i>Cohort study</i> —For matched studies, give matching criteria and number of exposed and unexposed                                                                                   |                                                            |
|                              |         | <i>Case-control study</i> —For matched studies, give matching criteria and the number of controls per case                                                                                 |                                                            |
|                              |         |                                                                                                                                                                                            |                                                            |
| Variables                    | 7 ✓     | Clearly define all outcomes, exposures, predictors, potential confounders, and effect modifiers. Give diagnostic criteria, if applicable                                                   | Pages 8-10, exposure, outcome and covariates               |
| Data sources/<br>measurement | 8* ✓    | For each variable of interest, give sources of data and details of methods of assessment (measurement). Describe comparability of assessment methods if there is more than one group       | Pages 8-10, exposure, outcome and covariates               |
| Bias                         | 9 ✓     | Describe any efforts to address potential sources of bias                                                                                                                                  | Pages 9, 10, statistical analysis and sensitivity analysis |
| Study size                   | 10      | Explain how the study size was arrived at                                                                                                                                                  |                                                            |
| Quantitative variables       | 11 ✓    | Explain how quantitative variables were handled in the analyses. If applicable, describe which groupings were chosen and why                                                               | Page 9, 10, covariates                                     |
| Statistical methods          | 12 ✓    | (a) Describe all statistical methods, including those used to control for confounding                                                                                                      | Page 10, 11, statistical analysis                          |
|                              |         | (b) Describe any methods used to examine subgroups and interactions                                                                                                                        |                                                            |
|                              |         | (c) Explain how missing data were addressed                                                                                                                                                |                                                            |
|                              |         | (d) <i>Cohort study</i> —If applicable, explain how loss to follow-up was addressed                                                                                                        |                                                            |
|                              |         | <i>Case-control study</i> —If applicable, explain how matching of cases and controls was addressed                                                                                         |                                                            |
|                              |         | <i>Cross-sectional study</i> —If applicable, describe analytical methods taking account of sampling strategy                                                                               |                                                            |
|                              | ✓       | (e) Describe any sensitivity analyses                                                                                                                                                      | Page 10, 11, statistical analysis                          |

Continued on next page

**Results**

|                          |     |                                                                                                                                                                                                                                                                                                                                                                                                               |                                                                                                                       |
|--------------------------|-----|---------------------------------------------------------------------------------------------------------------------------------------------------------------------------------------------------------------------------------------------------------------------------------------------------------------------------------------------------------------------------------------------------------------|-----------------------------------------------------------------------------------------------------------------------|
| Participants             | 13* | (a) Report numbers of individuals at each stage of study—eg numbers potentially eligible, examined for eligibility, confirmed eligible, included in the study, completing follow-up, and analysed<br>(b) Give reasons for non-participation at each stage<br>(c) Consider use of a flow diagram                                                                                                               | Page 11, results; Figures 2 and 3                                                                                     |
| Descriptive data         | 14* | (a) Give characteristics of study participants (eg demographic, clinical, social) and information on exposures and potential confounders<br>(b) Indicate number of participants with missing data for each variable of interest<br>(c) <i>Cohort study</i> —Summarise follow-up time (eg, average and total amount)                                                                                           | Page 11, 12, results; Table 1<br>Page 8, 9, methods (follow up defined in methods, there were no losses to follow up) |
| Outcome data             | 15* | <i>Cohort study</i> —Report numbers of outcome events or summary measures over time<br><i>Case-control study</i> —Report numbers in each exposure category, or summary measures of exposure<br><i>Cross-sectional study</i> —Report numbers of outcome events or summary measures                                                                                                                             | Page 11-13, results; Figures 2 and 3                                                                                  |
| Main results             | 16  | (a) Give unadjusted estimates and, if applicable, confounder-adjusted estimates and their precision (eg, 95% confidence interval). Make clear which confounders were adjusted for and why they were included<br>(b) Report category boundaries when continuous variables were categorized<br>(c) If relevant, consider translating estimates of relative risk into absolute risk for a meaningful time period | Tables 2 and 3<br>Pages 9-10, covariates                                                                              |
| Other analyses           | 17  | Report other analyses done—eg analyses of subgroups and interactions, and sensitivity analyses                                                                                                                                                                                                                                                                                                                | Tables 2 and 3                                                                                                        |
| <b>Discussion</b>        |     |                                                                                                                                                                                                                                                                                                                                                                                                               |                                                                                                                       |
| Key results              | 18  | Summarise key results with reference to study objectives                                                                                                                                                                                                                                                                                                                                                      | Page 13                                                                                                               |
| Limitations              | 19  | Discuss limitations of the study, taking into account sources of potential bias or imprecision. Discuss both direction and magnitude of any potential bias                                                                                                                                                                                                                                                    | Pages 15, 16                                                                                                          |
| Interpretation           | 20  | Give a cautious overall interpretation of results considering objectives, limitations, multiplicity of analyses, results from similar studies, and other relevant evidence                                                                                                                                                                                                                                    | Pages 15, 16                                                                                                          |
| Generalisability         | 21  | Discuss the generalisability (external validity) of the study results                                                                                                                                                                                                                                                                                                                                         | Page 16                                                                                                               |
| <b>Other information</b> |     |                                                                                                                                                                                                                                                                                                                                                                                                               |                                                                                                                       |
| Funding                  | 22  | Give the source of funding and the role of the funders for the present study and, if applicable, for the original study on which the present article is based                                                                                                                                                                                                                                                 | Page 2, end                                                                                                           |

\*Give information separately for cases and controls in case-control studies and, if applicable, for exposed and unexposed groups in cohort and cross-sectional studies.

**Note:** An Explanation and Elaboration article discusses each checklist item and gives methodological background and published examples of transparent reporting. The STROBE checklist is best used in conjunction with this article (freely available on the Web sites of PLoS Medicine at <http://www.plosmedicine.org/>, Annals of Internal Medicine at <http://www.annals.org/>, and Epidemiology at <http://www.epidem.com/>). Information on the STROBE Initiative is available at [www.strobe-statement.org](http://www.strobe-statement.org).

# BMJ Open

## Use of biologics during pregnancy and risk of serious infections in the mother and baby: A Canadian population-based cohort study

|                                 |                                                                                                                                                                                                                                                                                                                                                                                                                                                                                                                                                                                                                          |
|---------------------------------|--------------------------------------------------------------------------------------------------------------------------------------------------------------------------------------------------------------------------------------------------------------------------------------------------------------------------------------------------------------------------------------------------------------------------------------------------------------------------------------------------------------------------------------------------------------------------------------------------------------------------|
| Journal:                        | <i>BMJ Open</i>                                                                                                                                                                                                                                                                                                                                                                                                                                                                                                                                                                                                          |
| Manuscript ID                   | bmjopen-2018-023714.R2                                                                                                                                                                                                                                                                                                                                                                                                                                                                                                                                                                                                   |
| Article Type:                   | Research                                                                                                                                                                                                                                                                                                                                                                                                                                                                                                                                                                                                                 |
| Date Submitted by the Author:   | 06-Dec-2018                                                                                                                                                                                                                                                                                                                                                                                                                                                                                                                                                                                                              |
| Complete List of Authors:       | Tsao, Nicole; University of British Columbia, Faculty of Pharmaceutical Sciences; Arthritis Research Canada, Lynd, Larry; University of British Columbia, Faculty of Pharmaceutical Sciences; Centre for Health Evaluation and Outcomes Sciences Sayre, Eric; Arthritis Research Canada, Sadatsafavi, Mohsen; University of British Columbia, Faculty of Pharmaceutical Sciences; Centre for Clinical Epidemiology and Evaluation Hanley, Gillian; University of British Columbia, Obstetrics & Gynaecology De Vera, MA ; University of British Columbia, Faculty of Pharmaceutical Sciences; Arthritis Research Canada, |
| <b>Primary Subject Heading</b>: | Epidemiology                                                                                                                                                                                                                                                                                                                                                                                                                                                                                                                                                                                                             |
| Secondary Subject Heading:      | Immunology (including allergy), Obstetrics and gynaecology, Pharmacology and therapeutics, Rheumatology                                                                                                                                                                                                                                                                                                                                                                                                                                                                                                                  |
| Keywords:                       | Adverse events < THERAPEUTICS, RHEUMATOLOGY, Inflammatory bowel disease < GASTROENTEROLOGY, EPIDEMIOLOGY                                                                                                                                                                                                                                                                                                                                                                                                                                                                                                                 |
|                                 |                                                                                                                                                                                                                                                                                                                                                                                                                                                                                                                                                                                                                          |

SCHOLARONE™  
Manuscripts



1  
2  
3 **Use of biologics during pregnancy and risk of serious infections in the mother and baby: A**  
4  
5 **Canadian population-based cohort study**  
6  
7

8 **Authors:** Nicole W. Tsao, Larry D. Lynd, Eric C. Sayre, Mohsen Sadatsafavi, Gillian Hanley, Mary  
9  
10 A. De Vera

11  
12 Nicole W Tsao PhD, Faculty of Pharmaceutical Sciences University of British Columbia,  
13  
14 Vancouver, Canada, V6T 1Z3, Larry D Lynd Professor, Faculty of Pharmaceutical Sciences  
15  
16 University of British Columbia, Vancouver, Canada, V6T 1Z3, Eric C. Sayre, Arthritis Research  
17  
18 Canada, Richmond, Canada, V6X 2C7, Mohsen Sadatsafavi Assistant Professor, Faculty of  
19  
20 Pharmaceutical Sciences University of British Columbia, Vancouver, Canada, V6T 1Z3, Gillian  
21  
22 Hanley Assistant Professor, Faculty of Medicine, Department of Obstetrics & Gynecology,  
23  
24 University of British Columbia, Vancouver, Canada, V6Z 2K5, Mary A De Vera Assistant  
25  
26 Professor, Faculty of Pharmaceutical Sciences University of British Columbia, Vancouver, Canada,  
27  
28 V6T 1Z3  
29  
30  
31  
32

33 **Corresponding author:**

34  
35 Mary A. De Vera, PhD  
36  
37 University of British Columbia Faculty of Pharmaceutical Sciences  
38  
39 2405 Wesbrook Mall  
40  
41 Vancouver, BC, V6T 1Z3  
42  
43  
44 Tel: 604-221-8767; Email: [mdevera@mail.ubc.ca](mailto:mdevera@mail.ubc.ca)  
45  
46

47 **Key words:** biologics, pregnancy, infants, infections, autoimmune diseases  
48  
49  
50  
51

52 **Manuscript word count: 3234**  
53  
54  
55  
56  
57

1  
2  
3  
4  
5  
6  
7  
8 **Titles, funding, and grant support:**  
9

10 Dr. Tsao is a Canadian Institutes of Health Research Fellowship holder.

11  
12 Dr. Lynd is a Professor, and Director of Collaboration for Outcomes Research and  
13 Evaluation.  
14

15  
16 Dr. Sayre is a Research Associate and Statistician at Arthritis Research Canada  
17

18  
19 Dr. Sadatsafavi is an Assistant Professor, Canadian Institutes of Health Research  
20 New Investigator, and Michael Smith Foundation for Health Research Scholar  
21

22  
23 Dr. Hanley is an Assistant Professor, Canadian Institutes of Health Research New  
24 Investigator, and a recipient of Canadian Cancer Society Research Institute Capacity  
25 Development Award.  
26

27  
28 Dr. De Vera is an Assistant Professor, Canada Research Chair in Medication  
29 Adherence, Utilization, and Outcomes, The Arthritis Society Network Scholar, and  
30 Michael Smith Foundation for Health Research Scholar.  
31

32  
33 This research was funded by Arthritis Society Operating Grant (YIO-13-07) and  
34 Canadian Institutes of Health Research Operating Grant: Analyses of Existing  
35 Canadian Cohorts and Databases (AO1-151540). The funders had no part in the  
36 design, conduct, or reporting of this study.  
37  
38  
39  
40  
41  
42  
43  
44  
45  
46  
47  
48  
49  
50  
51  
52  
53  
54  
55  
56  
57  
58  
59  
60

## Abstract

**Objectives:** To investigate the association between exposure to biologics during pregnancy and serious infections in mothers and infants.

**Design:** Retrospective cohort study

**Setting:** Population-based

**Participants:** Women with one or more autoimmune diseases identified by International Classification of Diseases 9<sup>th</sup>/10<sup>th</sup> revision codes in healthcare administrative databases in British Columbia, Canada, who had pregnancies ending in a live or still birth between January 1st, 2002 and December 31st, 2012. Women were defined as exposed if they had at least one biologic prescription during pregnancy, and infants born to these women were considered exposed in utero. Disease-matched women with no biologics prescriptions during pregnancy, and their infants, comprised the unexposed groups.

**Primary outcome measures:** Serious infections requiring hospitalization.

**Results:** Over the 10-year study period, there were 6,218 women (8,607 pregnancies) who had an autoimmune disease diagnosis; of which 90 women were exposed to biologics during pregnancy, with 100 babies born to these women. Among women exposed to biologics during pregnancy, occurrence of serious post-partum infections were low, ranging from 0 to 5%, depending on concomitant exposures to immunosuppressants. In multivariable models using logistic regression, the adjusted odds ratio (aOR) for the association of biologics exposure with serious maternal post-partum infections was 0.79 (95% confidence interval [CI] 0.24 to 2.54). In infants exposed to biologics in utero, occurrence of serious infections during the first year of life ranged from 0 to 7%, depending on concomitant exposures to immunosuppressants in utero. Multivariable models showed no association between biologics exposure in utero and serious infant infections (aOR 0.56, 95%CI 0.17 to 1.81).

1  
2  
3 **Conclusions:** These population-based data suggest that the use of biologics by women with  
4  
5 autoimmune diseases during pregnancy is not associated with an increased risk of serious infections  
6  
7 in mothers, during post-partum, or in infants during the first year of life.  
8  
9  
10  
11  
12  
13  
14  
15  
16  
17  
18  
19  
20  
21  
22  
23  
24  
25  
26  
27  
28  
29  
30  
31  
32  
33  
34  
35  
36  
37  
38  
39  
40  
41  
42  
43  
44  
45  
46  
47  
48  
49  
50  
51  
52  
53  
54  
55  
56  
57  
58  
59  
60

For peer review only

## Article Summary

### Strengths and limitations of this study

- This is the first population-based cohort study to examine the risk of serious post-partum infections in mothers who were using biologics during pregnancy, and in infants exposed in utero.
- We used individual-level, de-identified, longitudinal data on all health services (physician visits, hospitalizations, and prescription medications) covering the entire population of the province, linked with a perinatal registry covering >99% of births.
- We used high-dimensional propensity score matching as a sensitivity analysis to the traditional multivariable models.
- The data sources come from administrative databases not primarily collected for research purposes and thus rely on accuracy of diagnostic coding.
- Exposures and outcomes remain relatively rare and as such, caution should be exercised when interpreting the findings in light of this context.

## Introduction

Biologics have revolutionized the management of several autoimmune chronic conditions, and are commonly used in inflammatory arthritis including rheumatoid arthritis (RA), ankylosing spondylitis (AS), psoriatic arthritis (PsA) as well as inflammatory bowel disease (IBD, ulcerative colitis and Crohn's disease) (1,2). They are typically genetically engineered parts of, or whole, immunoglobulin Gs (IgG) that inhibit specific components of the immune system that play pivotal roles in inflammation (3). Despite their established efficacy in managing autoimmune diseases, treatment with biologics is not without risks. Network meta-analyses show a significant increase in serious infections in RA patients treated with biologics alone (odds ratio [OR] 1.31; 95% credible interval 1.09 to 1.58) or in combination with traditional disease modifying anti-rheumatic drugs (DMARDs) (OR 1.34; 95% confidence interval [CI] 1.09 to 1.69) compared to DMARDs alone (4).

In pregnancy, infection risk is a unique safety outcome in that it can occur both in the mother and her infant possibly as a result of exposure to the same offending agent. Additionally, the risk of infections may already be elevated for the mother during the delivery and post-partum periods, and for the neonate after birth when their immune system is still naïve. During pregnancy, IgG is transferred from the maternal to the fetal circulation by receptor-mediated binding of the Fc $\gamma$  portion of the IgG molecule and its receptor, FcRn (Fc receptor neonatal) (5–7). The FcRn is also found to have a protective effect on IgG degradation, extending its lifespan, leading to accumulation in the infant for upwards of six to eight months (8). With infliximab and adalimumab having higher affinity for FcRn (9), levels of these biologics in offspring cord blood have been reported to be 300–400% higher than levels in the maternal circulation (10). Furthermore, detectable, and even therapeutic, levels of biologics in infant serum have been confirmed in case reports of infants exposed in utero (10–12). However, to date few epidemiologic studies have examined the risk of

1  
2  
3 infections in women using biologics during pregnancy, or in infants that were exposed to biologics  
4  
5 in utero. Our objectives were to investigate the association between exposure to biologics during  
6  
7 pregnancy and serious infections in 1) mothers during the post-partum period; and 2) infants during  
8  
9 the first year of life.  
10  
11  
12  
13

## 14 **Methods**

### 15 Data sources

16  
17  
18 Data for mothers and babies were obtained through Population Data BC, a repository of individual-  
19  
20 level, de-identified, longitudinal data on all health services covering the entire population of BC  
21  
22 (estimated 4.6 million residents, December 2016 (13)). Specifically, respective data for mothers and  
23  
24 babies comprised four linked databases including: 1) Medical Services Plan (MSP) database – all  
25  
26 provincially-funded physician visits, ordered laboratory tests and diagnostic procedures (x-rays,  
27  
28 ultrasounds etc.) (14); 2) Discharge Abstract Database (DAD) – all hospital admissions and  
29  
30 discharges (15); 3) PharmaNet – a comprehensive prescription drug database that captures all  
31  
32 prescriptions dispensed in community pharmacies regardless of payment source, since 1996 (16);  
33  
34 and 4) BC Perinatal Database Registry (BCPDR) - facilitated the linkage between mothers' and  
35  
36 babies' data. The BCPDR contains data abstracted from obstetrical and neonatal medical records on  
37  
38 nearly 100% of births in the province of BC from over 60 acute care facilities as well as births  
39  
40 occurring at home attended by BC registered midwives, including women who had pregnancies  
41  
42 ending in a live or still birth of at least 20 weeks gestation or 500 grams birth weight (17–20). Details  
43  
44 of these data sources are described in previous work (21) and databases and linkages are shown in  
45  
46  
47  
48  
49  
50  
51 Figure 1.  
52  
53  
54

### 55 Study cohort

1  
2  
3 The source population comprised of women in BC who had pregnancies ending in a live or still  
4 birth between January 1st, 2002 and December 31st, 2012, and were continuously covered by BC's  
5 provincial health plan for at least 12 months prior to the start of pregnancy and in the 12 months  
6 following delivery. This requirement of continuous insurance coverage ensures that we have  
7 complete data capture for all women and babies in our study population. We created a cohort of  
8 women from the source population who had a recorded diagnosis of one or more autoimmune  
9 diseases that could be treated with a biologic, including RA, IBD (Crohn's disease and ulcerative  
10 colitis), psoriasis (Ps)/PsA, AS, juvenile idiopathic arthritis, and systemic autoimmune rheumatic  
11 diseases. Women were considered to have been diagnosed with one of these conditions if they had  
12 the same International Classification of Diseases (ICD)-9<sup>th</sup> revision or 10<sup>th</sup> revision codes for a  
13 specific autoimmune disease from two separate physician visits that were at least 60 days apart and  
14 within two years, any time prior to the date of conception; or, having at least one hospitalization  
15 with an ICD-9/10 code for an autoimmune disease any time prior to the date of conception (21).  
16 Given that the unit of analysis was individual pregnancy, each pregnancy had to satisfy the above  
17 criteria in order to be included in the analyses. All singleton live born infants from these pregnancies  
18 were included in the analyses of infant serious infections.

### 41 Biologics exposure

42  
43 Using dispensation dates and Canadian Drug Identity Codes for biologics in PharmaNet linked with  
44 date of conception and date of delivery of each pregnancy in the BCPDR, exposure to biologics was  
45 identified in any woman in the autoimmune disease cohort with one or more prescriptions for a  
46 biologic anytime from the date of conception to the date of delivery (21). Infants born from these  
47 pregnancies were classified as being exposed to biologics in utero. Pregnancies that did not satisfy  
48 this criteria and infants born from those pregnancies were considered unexposed. All biologics



1  
2  
3 available in BC for the treatment of autoimmune diseases of interest during the study period, along  
4  
5 with concomitant medications considered in this study, are listed in Supplementary Table S1.  
6  
7  
8  
9

### 10 Serious infections

11  
12 The outcomes of interest were serious infections requiring hospitalization during the post-partum  
13  
14 period in women, and serious infections requiring hospitalization anytime during the first year of life  
15  
16 in infants. Serious post-partum infections were defined as any episode of hospitalization, including  
17  
18 the delivery episode, with one or more ICD-9/10 codes for an infection anytime from the date of  
19  
20 delivery until 42 days post-partum – the conventional definition for post-partum period of concern  
21  
22 (22). Serious infections in infants were defined as any episode of hospitalization with one or more  
23  
24 ICD-9/10 codes for an infection anytime during the first year of life – due to the lengthy  
25  
26 accumulation of biologics in infant circulation – or until death, whichever occurred first. All  
27  
28 infections considered are listed in Supplementary Table S2.  
29  
30  
31  
32  
33  
34

### 35 Covariates

36  
37 All covariates considered were from the aforementioned data sources. Maternal factors included  
38  
39 characteristics of current pregnancy, prior obstetrical history, comorbidities, and medication use.  
40  
41 Characteristics of current pregnancy included maternal age at delivery (continuous), parity  
42  
43 (primiparous or multiparous), neighborhood income quintile (based on postal code) at baseline,  
44  
45 body mass index (BMI) at first antenatal visit (continuous; and categorical as underweight: <18.5,  
46  
47 normal: 18.5-24.9, overweight: 25-29.9, obese:  $\geq 30$  kg/m<sup>2</sup>), weight gain during pregnancy (binary,  
48  
49 based on guidelines for weight gain during pregnancy by BMI category (23)), number of antenatal  
50  
51 visits (continuous), and hospitalization at baseline (binary), and delivery by cesarean section (binary).  
52  
53  
54  
55 Prior obstetrical history included binary outcomes from previous pregnancies (if applicable)  
56  
57  
58  
59  
60

1  
2  
3 including premature delivery, spontaneous abortions, neonatal death, stillbirth, low birth weight, and  
4 congenital anomalies. Comorbidities considered included gestational hypertension, gestational  
5 diabetes, anxiety disorders, mood disorders, asthma, hypertension, and diabetes. Concomitant  
6 medications included DMARDs or immunosuppressants, glucocorticoids, antidepressants,  
7 anxiolytics, traditional and COX-2 non-steroidal anti-inflammatory drugs (NSAIDs). All maternal  
8 factors considered in analyses of post-partum infections in the mother that could be associated with  
9 serious infections in infants were also considered in analyses of this latter outcome in addition to  
10 infant characteristics. Infant characteristics included sex and Apgar scores at 1 minute, 5 minutes,  
11 and 10 minutes (continuous). Other infant characteristics including gestational age, birth weight, and  
12 presence of anomalies were considered but not included in the analysis as they may be possible  
13 mediators of the effect of exposure on serious infections in infants.  
14  
15  
16  
17  
18  
19  
20  
21  
22  
23  
24  
25  
26  
27  
28  
29

### 30 Statistical Analysis

31  
32 Using logistic regression models we calculated ORs with 95% CIs between maternal exposure to  
33 biologics during pregnancy and the risk of serious post-partum infections in women, and the risk of  
34 serious infant infections during the first year of life; first as unadjusted models, by treatment  
35 categories only (model 1) and then adjusted for maternal and infant characteristics according to  
36 respective outcome (model 2). Multivariable models were constructed using forward selection and  
37 covariates were included in the final models if they were associated with the exposure in bivariate  
38 analyses and resulted in lower Akaike Information Criterion upon inclusion. Multivariable regression  
39 analyses using generalized estimating equation models with logit link and clustered by mother could  
40 not be completed as models did not converge. However, previous work on a larger sample from our  
41 source population showed that accounting for correlations between multiple pregnancies within the  
42 same woman did not appreciably change effect estimates and confidence intervals (21).  
43  
44  
45  
46  
47  
48  
49  
50  
51  
52  
53  
54  
55  
56  
57  
58  
59  
60

1  
2  
3  
4  
5 As a sensitivity analysis, we estimated propensity for biologics exposure in each pregnancy using a  
6 high dimensional propensity score (HDPS) algorithm that incorporated investigator-specified  
7 covariates and additional factors that acted as proxy variables for unmeasured confounders from the  
8 four aforementioned data dimensions (model 3) (24). These variables included use of medications  
9 (e.g. DMARDs, glucocorticoids), comorbidities (e.g. depression), and healthcare utilization (e.g.  
10 outpatient visits, prenatal care, and tests and investigations. The HDPS was calculated using logistic  
11 regression then each biologic exposed pregnancy was matched with five unexposed pregnancies (1:5  
12 ratio) without replacement, based on HDPS, whereby an unexposed pregnancy may only be used  
13 once as a match. Match performance was evaluated by comparing the standardized mean differences  
14 in baseline characteristics of matched and unmatched cohorts. Odds ratios and 95% CIs for  
15 biologics exposure and serious post-partum infections, and serious infant infections were calculated  
16 using logistic regression in the HDPS-matched samples. All analyses were conducted using SAS  
17 statistical software v.9.3 (Cary, NC, USA).  
18  
19  
20  
21  
22  
23  
24  
25  
26  
27  
28  
29  
30  
31  
32  
33  
34  
35  
36

### 37 Study Conduct

38  
39 This study was approved by the University of British Columbia, Behavioural Research Ethics Board.  
40 All inferences, opinions, and conclusions drawn in this manuscript are those of the authors, and do  
41 not reflect the opinions or policies of the data stewards. Due to data sharing agreements and  
42 confidentiality, cell sizes of less than five individuals are not reported.  
43  
44  
45  
46  
47  
48  
49

### 50 Patient and Public Involvement

51  
52 Patients were not involved in the design, recruitment, or conduct of the study as this is a  
53 retrospective cohort study using population-wide administrative data.  
54  
55  
56  
57

## Results

In the cohort of 6,218 women with autoimmune inflammatory disease diagnoses and 8,607 singleton pregnancies, there were 90 women exposed to biologics during pregnancy, and 100 babies born to these women. As shown in Table 1, in the biologics exposed group, more women had IBD or RA, used at least one DMARD or glucocorticoid, or had mood disorders; whereas in the group not exposed to biologics during pregnancy, more women had Ps/PsA and were multiparous. Also shown in Table 1, infants from pregnancies that were unexposed to biologics had more advanced gestational age and higher birth weight.

Among women exposed to biologics during pregnancy, occurrence of serious post-partum infections were rare, ranging from 0 to 5%, depending on concomitant exposures to DMARDs or glucocorticoids (Figure 2). Serious infections that occurred in those exposed to biologics included infection of the amniotic sac and membranes, and bacterial puerperal infections. In model 1 looking only at drug exposures, we found no independent associations between the use of biologics (OR 0.88, 95%CI 0.27 to 2.82), DMARDs (OR 0.98, 95%CI 0.68 to 1.40), or glucocorticoids (OR 1.07, 95%CI 0.64 to 1.77), with the risk of serious post-partum infections (Table 2). The results were similar when maternal factors were included (model 2), specifically, the association between biologics exposure and serious post-partum infections had an adjusted OR [aOR] of 0.79 (95%CI 0.24 to 2.54), DMARD/ immunosuppressants had an aOR of 0.98 (95%CI 0.68 to 1.40), and glucocorticoids an aOR of 1.00 (95%CI 0.60 to 1.67) (Table 2). In this model, we also found several independent maternal factors that were significantly associated with either increased or decreased post-partum infections; having an anxiety diagnosis, more previous hospitalizations, higher BMI at conception, and delivering via Cesarean section were all factors that increased the risk of serious

1  
2  
3 infection; while being multiparous appeared protective. Results from sensitivity analysis using  
4  
5 HDPS-matching and logistic regression had higher uncertainty due to a wide confidence interval  
6  
7 (model 3).  
8  
9

10  
11  
12 In infants exposed to biologics in utero, proportion of serious infections ranged from 0 to 7%  
13  
14 depending on the treatment combination used by the mother during pregnancy (Figure 3). The types  
15  
16 of serious infections that occurred during infants' first year of life were lymphadenitis, urinary tract  
17  
18 infection, and acute bronchiolitis. In model 1 examining categories of maternal drug exposures only,  
19  
20 we found no increased risk of serious infections in infants who were exposed to biologics (OR 0.50,  
21  
22 95%CI 0.16 to 1.60), or DMARDs (OR 1.07, 95%CI 0.81 to 1.43) in utero, while glucocorticoids  
23  
24 exposure appeared to possibly increase risk (OR 1.46, 95%CI 1.00 to 2.12). When maternal and  
25  
26 infant factors were considered (model 2), the risk of serious infections associated with biologics  
27  
28 exposure had an aOR of 0.56 (95%CI 0.17 to 1.81), DMARD/immunosuppressants had an aOR of  
29  
30 1.09 (95%CI 0.81 to 1.45), and glucocorticoids an aOR of 1.13 (95%CI 0.77 to 1.66) (Table 3).  
31  
32  
33 However, we found several maternal factors associated with an increased risk of infections in  
34  
35 infants, including multiparity, maternal history of prior delivery resulting in a low birth weight infant,  
36  
37 or premature infant, maternal use of anxiolytics, and maternal asthma diagnosis (Table 3). Factors  
38  
39 associated with a lower risk of serious infections included being a female infant, having higher Apgar  
40  
41 score at 1 minute, higher neighborhood income, and more antenatal visits. Sensitivity analysis using  
42  
43 logistic regression in the HDPS-matched cohort did not change these results (model 3).  
44  
45  
46  
47  
48  
49

## 50 **Discussion**

51  
52 In this study using linked administrative health data and a perinatal registry for a population-based  
53  
54 cohort of women with autoimmune disease and their babies, we examined the association between  
55  
56

1  
2  
3 exposure to biologics during pregnancy and risk of serious infections in mothers and infants,  
4  
5 respectively. Specifically for mothers, these were infections requiring hospitalization during the post-  
6  
7 partum period; and for infants, these were infections requiring hospitalization during their first year  
8  
9 of life. We found that the proportion of serious infections in all groups was low. Our findings  
10  
11 suggest that there was no difference in risk of serious post-partum infections in women who used  
12  
13 biologics during pregnancy versus those who did not. Similarly, we did not observe a difference in  
14  
15 risk of serious infections during the first year of life in infants born to mothers who used biologics  
16  
17 during pregnancy compared to those who did not. While we examined all biologics used in the  
18  
19 cohort, TNF-alpha inhibitor biologics (94%) were the most common, and as such our results mostly  
20  
21 apply to these biologics and less so to those that are not TNF-alpha inhibitors.  
22  
23  
24  
25  
26  
27

28 Indeed serious infections are a well-known safety outcome in patients using biologics to manage  
29  
30 their autoimmune diseases, and despite pregnant women and infants being vulnerable populations  
31  
32 there has been a dearth of evidence on this clinically important topic. One population-based study in  
33  
34 the United States by Desai et al. compared serious intrapartum infections among 776 users of  
35  
36 biologics compared to 1587 users of non-biologics and reported no meaningful increase risk of  
37  
38 serious infection during pregnancy (adjusted hazard ratio [aHR] 1.36, 95%CI 0.47 to 3.93) (25).  
39  
40 However, the authors did observe that the rate of infections increased noticeably in all treatment  
41  
42 groups as pregnancies approached term (25), thus, providing a rationale for the objective of our  
43  
44 study which examined the risk of infections around the time of childbirth, and post-partum. No  
45  
46 other studies to date have specifically investigated the association between biologics use and the risk  
47  
48 of post-partum infections despite the fact that post-partum infections account for up to 10% of  
49  
50 maternal deaths, and are a cause of short term morbidity and long term complications (26). It is  
51  
52  
53  
54  
55  
56  
57  
58  
59  
60

1  
2  
3 therefore reassuring that our study did not show an association between biologics use during  
4 pregnancy and maternal risk of post-partum infections.  
5  
6  
7  
8  
9

10 Infections is a theoretical concern in infants exposed to biologics in utero, due to evidence of  
11 accumulation of certain biologics in cord blood (10). The immunosuppressive effect of TNF-alpha  
12 inhibitor accumulation is illustrated by a fatal case of disseminated Bacillus Calmette–Guérin (BCG)  
13 infection after BCG vaccination in an infant born to a mother treated with infliximab throughout  
14 her pregnancy (27). The infant received a BCG vaccination at 3 months of age, subsequently became  
15 ill, and died at 4.5 months of age from disseminated infection (27). Current recommendations to  
16 stop some biologics in the third trimester are largely based on such case reports and expert opinion  
17 (28). To date, there have only been two published abstracts examining the association of biologics  
18 exposure and risk of serious infections in infants. Using data collected by the Organization of  
19 Teratology Information Specialists (OTIS), Chambers et al. found similar proportions of serious  
20 infections during the first year of life in infants born to women with RA using biologics during  
21 pregnancy (2.8%), compared to those born to women with RA not treated with a biologic (3.9%),  
22 with a relative risk of 0.71 (95%CI 0.30 to 1.71) (29). In a registry of women with IBD, Chaparro et  
23 al. found that after a median follow up of 33 months post-partum, similarly, infants exposed to  
24 biologics in utero were not at greater risk of serious infections (HR 0.5, 95%CI 0.2 to 1.3) (30). Our  
25 study is the first to corroborate these results using population-based data.  
26  
27  
28  
29  
30  
31  
32  
33  
34  
35  
36  
37  
38  
39  
40  
41  
42  
43  
44  
45  
46  
47

48 This study has a number of strengths and limitations. The use of population-wide databases with  
49 high coverage lends this study greater generalizability; linkages between databases containing valid  
50 information on all dispensed prescriptions (PharmaNet) and antenatal, intrapartum, and postpartum  
51 maternal and infant information (BCPDR) provides the ability to accurately determine the timing of  
52  
53  
54  
55  
56  
57  
58  
59  
60

1  
2  
3 all medication dispensations with respect to conception dates. Linkages between maternal and infant  
4 data allows for ascertainment of infant exposure status in utero. Altogether, these strengths  
5 minimize potential biases caused by problems such as selection bias, patient recall bias, reporting  
6 bias, and exposure misclassification.  
7  
8  
9  
10

11  
12  
13  
14 The main limitation of our study stems from the uncertainty of risk estimates attributable to the  
15 relatively small sample size of the exposed, as such, a doubling to tripling in the risk of serious  
16 infections remains compatible with the upper bound of the confidence intervals of our estimates.  
17  
18 With respect to exposure, while prescription dispensations does not necessarily equate to medication  
19 use, research by the EuroMAP Group has shown that pregnant women report taking 43-50% of  
20 their prescribed medications, a level of medication adherence consistent with non-pregnant  
21 populations, and that adherence tends to be higher (70–100%) for drugs used in the treatment of  
22 chronic diseases in this population (31). Our previous study within the same cohort showed that the  
23 proportion of women discontinuing their biologic became larger as pregnancy progressed, resulting  
24 in fewer women being exposed close to delivery, which could be an explanation for the low  
25 numbers of outcomes observed in this study (21). Also due to the rare occurrence of the outcomes  
26 of interest, subgroup analyses of specific biologics, or specific autoimmune disease types were not  
27 possible. Other limitations included potential misclassification of the outcome, as a code for an  
28 infection could have been in any diagnostic field in the discharge abstract data and may not have  
29 been the primary reason for hospitalization. Furthermore, we could not obtain any data on  
30 breastfeeding practices which has been shown to be protective against infections requiring  
31 hospitalizations (32), other potentially important factors that were unavailable included maternal  
32 smoking status and alcohol or other substance use. However, our findings of other factors  
33 independently associated with serious infections, such as maternal BMI (33), Cesarean section  
34  
35  
36  
37  
38  
39  
40  
41  
42  
43  
44  
45  
46  
47  
48  
49  
50  
51  
52  
53  
54  
55  
56  
57  
58  
59  
60



1  
2  
3 delivery (34,35), infant gender (36), and maternal asthma diagnosis (37), are consistent with that  
4 reported in literature and thus lend validity to our results. Finally, although we used HDPS  
5 approaches in sensitivity analyses to address confounding by indication, an inherent limitation of  
6 administrative data, such as those used in our study, is that they do not provide clinical information  
7 to allow assessment of disease severity.  
8  
9  
10  
11  
12  
13  
14  
15

16 In conclusion, from this population-based cohort we did not observe differences in the risk of  
17 serious infections in women using or not using TNF-alpha inhibitor biologics during pregnancies or  
18 in their offspring during the first year of life. Our findings are compatible with current  
19 recommendations where discontinuation of TNF-alpha inhibitor biologics late in the pregnancy  
20 could be considered, or if indicated, can be continued throughout the pregnancy (28,38). Our study  
21 provides information for clinicians and women with autoimmune diseases regarding the risks of  
22 serious infections when using biologics during pregnancy.  
23  
24  
25  
26  
27  
28  
29  
30  
31  
32  
33

### 34 **Author Statement**

35 Dr. Tsao had full access to all the data used in this study and takes responsibility for the integrity of  
36 the data and accuracy of data analysis. As the lead author, Dr. Tsao affirms that this manuscript is an  
37 honest, accurate, and transparent account of the study being reported; that no important aspects of  
38 the study have been omitted; and that any discrepancies from the study as planned (and, if relevant,  
39 registered) have been explained. Contributions of authors to this study are as follows, for concept  
40 and design: De Vera, Tsao; acquisition, analysis, and interpretation of data: De Vera, Tsao, Sayre;  
41 drafting of manuscript: Tsao, De Vera; critical revision of manuscript for important intellectual  
42 content: Tsao, De Vera, Sadatsafavi, Hanley, Lynd; statistical analysis: Tsao, Sayre; obtained funding:  
43 De Vera. Dr. Lynd has received honoraria from Boehringer Ingelheim and Pfizer Canada for  
44  
45  
46  
47  
48  
49  
50  
51  
52  
53  
54  
55  
56  
57  
58  
59  
60

1  
2  
3 consulting services unrelated to this study, all other authors have declared no support from any  
4  
5 organisation for the submitted work; no financial relationships with any organisations that might  
6  
7 have an interest in the submitted work in the previous three years, no other relationships or activities  
8  
9 that could appear to have influenced the submitted work.  
10  
11  
12  
13

#### 14 **Data Sharing Statement**

15  
16 Due to privacy agreements, data used in this study cannot be shared.  
17  
18  
19  
20

#### 21 **Acknowledgements**

22  
23 The authors would like to thank Dr. Jeremy Rassen for his help in implementing the high-  
24  
25 dimensional propensity score program.  
26  
27  
28  
29

#### 30 **Conflicts of Interest**

31  
32 Dr. Larry Lynd has received honoraria from Boehringer Ingelheim and Pfizer Canada for consulting  
33  
34 services unrelated to this study. All other authors have declared no support from any organization  
35  
36 for the submitted work.  
37  
38  
39  
40  
41  
42  
43  
44  
45  
46  
47  
48  
49  
50  
51  
52  
53  
54  
55  
56  
57  
58  
59  
60

## References

1. Rosman Z, Shoenfeld Y, Zandman-Goddard G. Biologic therapy for autoimmune diseases: an update. *BMC Med*. 2013 Apr 4;11(1):88.
2. Tiligada E, Ishii M, Riccardi C, Spedding M, Simon H-U, Teixeira MM, et al. The expanding role of immunopharmacology – IUPHAR Review 16. *Br J Pharmacol* [Internet]. 2015 Aug 1 [cited 2015 Jul 31]; Available from: <http://onlinelibrary.wiley.com/doi/10.1111/bph.13219/abstract>
3. Scott DL. Biologics-Based Therapy for the Treatment of Rheumatoid Arthritis. *Clin Pharmacol Ther*. 2012 Jan 1;91(1):30–43.
4. Singh JA, Cameron C, Noorbaloochi S, Cullis T, Tucker M, Christensen R, et al. Risk of serious infection in biological treatment of patients with rheumatoid arthritis: a systematic review and meta-analysis. *The Lancet*. 2015 Jul 24;386(9990):258–65.
5. Brambell FW. The transmission of immunity from mother to young and the catabolism of immunoglobulins. *Lancet Lond Engl*. 1966 Nov 19;2(7473):1087–93.
6. Wood GW, Bjerrum K, Johnson B. Detection of IgG bound within human trophoblast. *J Immunol*. 1982 Oct 1;129(4):1479–84.
7. Kane SV, Acquah LA. Placental Transport of Immunoglobulins: A Clinical Review for Gastroenterologists Who Prescribe Therapeutic Monoclonal Antibodies to Women During Conception and Pregnancy. *Am J Gastroenterol*. 2009 Jan 1;104(1):228–33.
8. Junghans RP, Anderson CL. The protection receptor for IgG catabolism is the beta2-microglobulin-containing neonatal intestinal transport receptor. *Proc Natl Acad Sci U S A*. 1996 May 28;93(11):5512–6.
9. Porter C, Armstrong-Fisher S, Kopotsha T, Smith B, Baker T, Kevorkian L, et al. Certolizumab pegol does not bind the neonatal Fc receptor (FcRn): Consequences for FcRn-mediated in vitro transcytosis and ex vivo human placental transfer. *J Reprod Immunol*. 2016;116:7–12.
10. Soh MC, Nelson-Piercy C. High-risk pregnancy and the rheumatologist. *Rheumatol Oxf Engl*. 2015 Apr;54(4):572–87.
11. Vasilias EA, Church JA, Silverman N, Barry M, Targan SR, Dubinsky MC. Case report: evidence for transplacental transfer of maternally administered infliximab to the newborn. *Clin Gastroenterol Hepatol Off Clin Pract J Am Gastroenterol Assoc*. 2006 Oct;4(10):1255–8.
12. Vinet E, Pineau C, Gordon C, Clarke AE, Bernatsky S. Biologic therapy and pregnancy outcomes in women with rheumatic diseases. *Arthritis Rheum*. 2009 May 15;61(5):587–92.
13. Population Data BC. Population Data BC: Data Linkage [Internet]. 2016 [cited 2017 Mar 13]. Available from: <https://www.popdata.bc.ca/datalinkage>

14. British Columbia Ministry of Health (2013): Medical Services Plan (MSP) Payment Information File. [Internet]. Population Data BC. Data Extract. MOH. 2014. Available from: <http://www.popdata.bc.ca/data>
15. Canadian Institute for Health Information (2013): Discharge Abstract Database (Hospital Separations). [Internet]. Population Data BC. Data Extract. MOH. 2014. Available from: <http://www.popdata.bc.ca/data>
16. BC Ministry of Health (2013): PharmaNet. [Internet]. BC Ministry of Health. Data Extract. Data Stewardship Committee. 2014. Available from: <http://www.popdata.bc.ca/data>
17. BC Vital Statistics Agency (2012): Vital Statistics Births. [Internet]. Population Data BC. Data Extract. BC Vital Statistics Agency. 2014. Available from: <http://www.popdata.bc.ca/data>
18. BC Vital Statistics Agency (2012): Vital Statistics Stillbirths. [Internet]. Population Data BC. Data Extract. BC Vital Statistics Agency. 2014. Available from: <http://www.popdata.bc.ca/data>
19. BC Vital Statistics Agency (2013): Vital Statistics Deaths. [Internet]. Population Data BC. Data Extract. BC Vital Statistics Agency. 2014. Available from: <http://www.popdata.bc.ca/data>
20. Perinatal Services BC (2012): British Columbia Perinatal Data Registry [Internet]. Population Data BC. Data Extract. PSBC. 2014. Available from: <http://www.perinataleservicesbc.ca/health-professionals/data-surveillance/perinatal-data-registry>
21. Tsao NW, Lynd LD, Sadatsafavi M, Hanley G, De Vera MA. Patterns of biologics utilization and discontinuation before and during pregnancy in women with autoimmune diseases: A population-based cohort study. *Arthritis Care Res.* 2018 Jul;70(7):979–86.
22. Romano M, Cacciatore A, Giordano R, La Rosa B. Postpartum period: three distinct but continuous phases. *J Prenat Med.* 2010;4(2):22–5.
23. Rasmussen KM, Catalano PM, Yaktine AL. New guidelines for weight gain during pregnancy: what obstetrician/gynecologists should know. *Curr Opin Obstet Gynecol.* 2009 Dec;21(6):521–6.
24. Schneeweiss S, Rassen JA, Glynn RJ, Avorn J, Mogun H, Brookhart MA. High-dimensional propensity score adjustment in studies of treatment effects using health care claims data. *Epidemiol Camb Mass.* 2009 Jul;20(4):512–22.
25. Desai RJ, Bateman BT, Huybrechts KF, Paterno E, Hernandez-Diaz S, Park Y, et al. Risk of serious infections associated with use of immunosuppressive agents in pregnant women with autoimmune inflammatory conditions: cohort study. *BMJ.* 2017 Mar 6;356:j895.
26. Bonet M, Oladapo OT, Khan DN, Mathai M, Gülmezoglu AM. New WHO guidance on prevention and treatment of maternal peripartum infections. *Lancet Glob Health.* 2015 Nov 1;3(11):e667–8.

- 1
- 2
- 3 27. Cheent K, Nolan J, Shariq S, Kiho L, Pal A, Arnold J. Case Report: Fatal case of disseminated
- 4 BCG infection in an infant born to a mother taking infliximab for Crohn's disease. *J Crohns*
- 5 *Colitis*. 2010 Nov;4(5):603–5.
- 6
- 7 28. Flint J, Panchal S, Hurrell A, Venne M van de, Gayed M, Schreiber K, et al. BSR and BHPR
- 8 guideline on prescribing drugs in pregnancy and breastfeeding—Part I: standard and biologic
- 9 disease modifying anti-rheumatic drugs and corticosteroids. *Rheumatology*. 2016 Sep
- 10 1;55(9):1693–7.
- 11
- 12 29. Chambers, CD, Johnson, DL, Luo, Y, Xu, R, Jones, KL. Serious or opportunistic infections in
- 13 infants born to pregnant women with rheumatoid arthritis and treated with a biologic
- 14 medication. American College of Rheumatology Annual Meeting; 2017 Sep 18; San Diego, CA.
- 15
- 16 30. Chaparro, M, Magro, F, Savarino, E, Zabana, Y, Pugliese, D, Bar-Gil Shitrit, A, et al. Long-
- 17 term safety of in utero exposure to anti-TNF alpha drugs for the treatment of inflammatory
- 18 bowel diseases (IBD): Interim results of the TEDDY study. 11th Congr Eur Crohns Colitis
- 19 Organ. :S415.
- 20
- 21 31. Olesen C, Søndergaard C, Thrane N, Lauge Nielsen G, de Jong-van den Berg L, Olsen J, et al.
- 22 Do Pregnant Women Report Use of Dispensed Medications? *Epidemiology*. 2001
- 23 Sep;12(5):497.
- 24
- 25 32. Størdal K, Lundeby KM, Brantsæter AL, Haugen M, Nakstad B, Lund-Blix NA, et al. Breast-
- 26 feeding and Infant Hospitalization for Infections: Large Cohort and Sibling Analysis. *J Pediatr*
- 27 *Gastroenterol Nutr*. 2017 Aug;65(2):225–31.
- 28
- 29 33. Axelsson D, Brynhildsen J, Blomberg M. Postpartum infection in relation to maternal
- 30 characteristics, obstetric interventions and complications. *J Perinat Med*. 2018 Apr
- 31 25;46(3):271–8.
- 32
- 33 34. Gibbs RS. Clinical risk factors for puerperal infection. *Obstet Gynecol*. 1980 May;55(5
- 34 Suppl):178S-184S.
- 35
- 36 35. Yokoe DS, Christiansen CL, Johnson R, Sands KE, Livingston J, Shtatland ES, et al.
- 37 Epidemiology of and surveillance for postpartum infections. *Emerg Infect Dis*. 2001;7(5):837–
- 38 41.
- 39
- 40 36. Muenchhoff M, Goulder PJR. Sex Differences in Pediatric Infectious Diseases. *J Infect Dis*.
- 41 2014 Jul 15;209(Suppl 3):S120–6.
- 42
- 43 37. Carroll KN, Gebretsadik T, Minton P, Woodward K, Liu Z, Miller EK, et al. Influence of
- 44 maternal asthma on etiology and severity of infant acute respiratory infection. *J Allergy Clin*
- 45 *Immunol*. 2012 May;129(5):1236–42.
- 46
- 47 38. Skorpen CG, Hoeltzenbein M, Tincani A, Fischer-Betz R, Elefant E, Chambers C, et al. The
- 48 EULAR points to consider for use of antirheumatic drugs before pregnancy, and during
- 49 pregnancy and lactation. *Ann Rheum Dis*. 2016 May;75(5):795–810.
- 50
- 51
- 52
- 53
- 54
- 55
- 56
- 57
- 58
- 59
- 60

1  
2  
3 **Tables and Figures**  
4

5 **Figure 1. Schematic diagram of databases and linkages facilitating study analyses**  
6  
7  
8  
9  
10  
11  
12  
13  
14  
15  
16  
17  
18  
19  
20  
21  
22  
23  
24  
25  
26  
27  
28  
29  
30  
31  
32  
33  
34  
35  
36  
37  
38  
39  
40  
41  
42  
43  
44  
45  
46  
47  
48  
49  
50  
51  
52  
53  
54  
55  
56  
57  
58  
59  
60

For peer review only

**Table 1. Characteristics of moms and infants in pregnancies exposed and unexposed to biologics**

| Maternal Characteristics              | Biologic exposed | Biologic unexposed | p-value |
|---------------------------------------|------------------|--------------------|---------|
| <b>Current pregnancy</b>              |                  |                    |         |
| Maternal age at delivery (mean (SD))  | 31.0 (4.7)       | 31.2 (5.2)         | 0.657   |
| Multiparous                           | 44 (44%)         | 4998 (59%)         | 0.003   |
| Antenatal visits (mean (SD))          | 8.9 (3.6)        | 9.0 (3.9)          | 0.749   |
| Gestational hypertension              | 5 (5%)           | 647 (8%)           | 0.328   |
| Gestational diabetes                  | 12 (12%)         | 669 (8%)           | 0.128   |
| Delivery via Cesarean section         | 40 (40%)         | 2849 (33%)         | 0.171   |
| <b>Neighbourhood income quintiles</b> |                  |                    |         |
| 5 <sup>th</sup> percentile            | 21 (21%)         | 1763 (21%)         | 0.836   |
| 25 <sup>th</sup> percentile           | 24 (24%)         | 1699 (20%)         |         |
| Median (50 <sup>th</sup> percentile)  | 17 (17%)         | 1845 (22%)         |         |
| 75 <sup>th</sup> percentile           | 22 (22%)         | 1803 (21%)         |         |
| 95 <sup>th</sup> percentile           | 16 (16%)         | 1397 (16%)         |         |
| Hospitalization at baseline           | 99 (99%)         | 8412 (99%)         | 0.912   |
| BMI at baseline (mean (SD))           | 24.7 (4.6)       | 24.6 (4.5)         | 0.867   |
| <b>BMI categories</b>                 |                  |                    |         |
| Obese                                 | 9 (9%)           | 851 (10%)          | 0.979   |
| Overweight                            | 15 (15%)         | 1342 (16%)         |         |
| <b>Prior obstetrical history</b>      |                  |                    |         |
| Premature delivery                    | 5 (5%)           | 500 (6%)           | 0.711   |
| Spontaneous abortion                  | 28 (28%)         | 2230 (26%)         | 0.686   |
| Delivery with neonatal death          | <5 <sup>†</sup>  | 52 (0.6%)          | 0.621   |
| Stillbirth                            | <5 <sup>†</sup>  | 103 (1%)           | 0.107   |
| Low birth weight infant               | 5 (5%)           | 243 (3%)           | 0.203   |
| Infant with anomalies                 | 0 (0%)           | 74 (1%)            | 0.349   |
| <b>Autoimmune disease type*</b>       |                  |                    |         |
| Inflammatory bowel disease            | 50 (50%)         | 2471 (29%)         | <0.001  |
| Rheumatoid arthritis                  | 44 (44%)         | 1756 (21%)         | <0.001  |
| Psoriasis/psoriatic arthritis         | 16 (16%)         | 3441 (40%)         | <0.001  |
| Juvenile idiopathic arthritis         | 8 (8%)           | 93 (1%)            | <0.001  |

1  
2  
3  
4  
5  
6  
7  
8  
9  
10  
11  
12  
13  
14  
15  
16  
17  
18  
19  
20  
21  
22  
23  
24  
25  
26  
27  
28  
29  
30  
31  
32  
33  
34  
35  
36  
37  
38  
39  
40  
41  
42  
43  
44  
45  
46  
47  
48  
49  
50  
51  
52  
53  
54  
55  
56  
57  
58  
59  
60

|                                        |                         |                           |        |
|----------------------------------------|-------------------------|---------------------------|--------|
| Systemic autoimmune rheumatic diseases | 5 (5%)                  | 1063 (12%)                | 0.024  |
| Ankylosing spondylitis                 | 5 (5%)                  | 417 (5%)                  | 0.964  |
| <b>Biologics<sup>‡</sup></b>           |                         |                           |        |
| Infliximab                             | 54 (54%)                |                           |        |
| Etanercept                             | 41 (41%)                |                           |        |
| Adalimumab                             | 39 (39%)                |                           |        |
| Other biologic <sup>**</sup>           | 18 (18%)                |                           |        |
| <b>Concomitant medications</b>         |                         |                           |        |
| DMARDs                                 | 53 (53%)                | 1843 (22%)                | <0.001 |
| Glucocorticoids                        | 54 (54%)                | 1065 (13%)                | <0.001 |
| Traditional NSAIDs                     | 16 (16%)                | 941 (11%)                 | 0.118  |
| Antidepressants                        | 16 (16%)                | 783 (9%)                  | 0.020  |
| Anxiolytics                            | <5 <sup>†</sup>         | 394 (5%)                  | 0.765  |
| COX2 NSAIDs                            | <5 <sup>†</sup>         | 56 (0.7%)                 | <0.001 |
| <b>Comorbidities</b>                   |                         |                           |        |
| Anxiety                                | 19 (19%)                | 1368 (16%)                | 0.430  |
| Mood disorders                         | 10 (10%)                | 432 (5%)                  | 0.027  |
| Asthma                                 | <5 <sup>†</sup>         | 154 (2%)                  | 0.888  |
| Diabetes                               | <5 <sup>†</sup>         | 563 (6.6%)                | 0.294  |
| Hypertension                           | 6 (6%)                  | 975 (11.5%)               | 0.088  |
| <b>Infant Characteristics</b>          | <b>Biologic exposed</b> | <b>Biologic unexposed</b> |        |
| Female sex                             | 55 (55%)                | 4159 (49%)                | 0.224  |
| Gestational age (mean (SD))            | 37.8 weeks (2.4)        | 38.4 weeks (2.2)          | 0.004  |
| Birth weight (mean (SD))               | 3158 grams (634)        | 3385 grams (204)          | <0.001 |
| Apgar score at 1 minute (mean (SD))    | 8.1 (1.6)               | 8.0 (1.7)                 | 0.730  |
| Apgar score at 5 minutes (mean (SD))   | 8.9 (1.1)               | 9.0 (1.0)                 | 0.595  |

SD = standard deviation, BMI = body mass index, DMARDs = disease modifying anti-rheumatic drugs, NSAIDs = non-steroidal anti-inflammatory drugs, COX = cyclooxygenase

\*Sum of percentages exceed 100% due to some individuals having more than one diagnosis

<sup>†</sup>All cell sizes <5 are suppressed due to privacy restrictions of data sharing agreements

<sup>‡</sup>Sum of percentages exceed 100% due to some pregnancies being exposed to more than one drug

\*\*Other biologics include: abatacept, alefacept, certolizumab pegol, golimumab, rituximab, tocilizumab, and ustekinumab

<sup>††</sup>p-values based on t-tests or Chi-square tests



1  
2  
3  
4  
5  
6  
7  
8  
9  
10  
11  
12  
13  
14  
15  
16  
17  
18  
19  
20  
21  
22  
23  
24  
25  
26  
27  
28  
29  
30  
31  
32  
33  
34  
35  
36  
37  
38  
39  
40  
41  
42  
43  
44  
45  
46  
47  
48  
49  
50  
51  
52  
53  
54  
55  
56  
57  
58  
59  
60

For peer review only

1  
2  
3 **Figure 2. Rates of maternal post-partum serious infections based on drug exposure**  
4 **categories**  
5  
6  
7  
8  
9  
10  
11  
12  
13  
14  
15  
16  
17  
18  
19  
20  
21  
22  
23  
24  
25  
26  
27  
28  
29  
30  
31  
32  
33  
34  
35  
36  
37  
38  
39  
40  
41  
42  
43  
44  
45  
46  
47  
48  
49  
50  
51  
52  
53  
54  
55  
56  
57  
58  
59  
60

For peer review only

1  
2  
3  
4  
5  
6  
7  
8  
9  
10  
11  
12  
13  
14  
15  
16  
17  
18  
19  
20  
21  
22  
23  
24  
25  
26  
27  
28  
29  
30  
31  
32  
33  
34  
35  
36  
37  
38  
39  
40  
41  
42  
43  
44  
45  
46  
47  
48  
49  
50  
51  
52  
53  
54  
55  
56  
57  
58  
59  
60

**Figure 3. Rates of infant serious infections during the first year of life based on in utero drug exposure categories**

For peer review only

**Table 2. Risk of serious maternal post-partum infections associated with biologics exposure during pregnancy**

|                            |                           | Maternal serious infections |  |
|----------------------------|---------------------------|-----------------------------|--|
|                            | Parameter                 | OR (95% CI)                 |  |
| <b>Unadjusted</b>          | Biologics                 | 0.90 (0.28 to 2.84)         |  |
| <b>Model 1</b>             | Biologics                 | 0.88 (0.27 to 2.82)         |  |
|                            | DMARDs/immunosuppressants | 0.98 (0.68 to 1.40)         |  |
|                            | Glucocorticoids           | 1.07 (0.64 to 1.77)         |  |
| <b>Model 2</b>             | Biologics                 | 0.79 (0.24 to 2.54)         |  |
|                            | DMARDs/immunosuppressants | 0.98 (0.68 to 1.40)         |  |
|                            | Glucocorticoids           | 1.00 (0.60 to 1.67)         |  |
|                            | Multiparity               | 0.60 (0.47 to 0.76)         |  |
|                            | Anxiety                   | 1.36 (1.02 to 1.82)         |  |
|                            | Prior hospital admissions | 1.19 (1.06 to 1.34)         |  |
|                            | BMI at baseline           | 1.02 (1.00 to 1.05)         |  |
| <b>Model 3</b>             | Cesarean section delivery | 2.01 (1.58 to 2.55)         |  |
|                            | Biologics                 | 1.16 (0.34 to 4.14)         |  |
| <b>HDPS-matched cohort</b> |                           |                             |  |

OR = odds ratio, HDPS = high-dimensional propensity score, DMARDs = disease modifying anti-rheumatic drugs, BMI = body mass index

**Table 3. Risk of serious infant infections during the first year of life associated with biologics exposure in utero**

|                                            |                                         | Infant serious infections |
|--------------------------------------------|-----------------------------------------|---------------------------|
|                                            | Parameter                               | OR (95% CI)               |
| <b>Unadjusted</b>                          | Biologics                               | 0.58 (0.18 to 1.85)       |
| <b>Model 1</b>                             | Biologics                               | 0.50 (0.16 to 1.60)       |
|                                            | DMARDs/immunosuppressants               | 1.07 (0.81 to 1.43)       |
|                                            | Glucocorticoids                         | 1.46 (1.00 to 2.12)       |
| <b>Model 2</b>                             | Biologics                               | 0.56 (0.17 to 1.81)       |
|                                            | DMARDs/immunosuppressants               | 1.09 (0.81 to 1.45)       |
|                                            | Glucocorticoids                         | 1.13 (0.77 to 1.66)       |
|                                            | Female sex                              | 0.73 (0.60 to 0.89)       |
|                                            | Multiparity                             | 1.56 (1.25 to 1.95)       |
|                                            | Maternal antenatal visits               | 0.97 (0.94 to 0.99)       |
|                                            | Prior delivery with anomaly             | 2.04 (0.98 to 4.26)       |
|                                            | Prior delivery with low birth weight    | 1.67 (1.05 to 2.64)       |
|                                            | Prior premature delivery                | 1.73 (1.21 to 2.47)       |
|                                            | Maternal anti-depressant use            | 1.30 (0.97 to 1.75)       |
|                                            | Maternal anxiolytics use                | 1.66 (1.15 to 2.40)       |
|                                            | Maternal rheumatoid arthritis diagnosis | 1.17 (0.93 to 1.47)       |
|                                            | Maternal asthma diagnosis               | 2.00 (1.18 to 3.39)       |
| Apgar score at 1 minute                    | 0.87 (0.83 to 0.92)                     |                           |
| Neighbourhood income quintile              | 0.91 (0.85 to 0.98)                     |                           |
| <b>Model 3<br/>HDPS-matched<br/>cohort</b> | Biologics                               | 0.49 (0.15 to 1.62)       |

OR = odds ratio, HDPS = high-dimensional propensity score, DMARDs = disease modifying anti-rheumatic drugs



Figure 1. Schematic diagram of databases and linkages facilitating study analyses

215x279mm (300 x 300 DPI)

1  
2  
3  
4  
5  
6  
7  
8  
9  
10  
11  
12  
13  
14  
15  
16  
17  
18  
19  
20  
21  
22  
23  
24  
25  
26  
27  
28  
29  
30  
31  
32  
33  
34  
35  
36  
37  
38  
39  
40  
41  
42  
43  
44  
45  
46  
47  
48  
49  
50  
51  
52  
53  
54  
55  
56  
57  
58  
59  
60

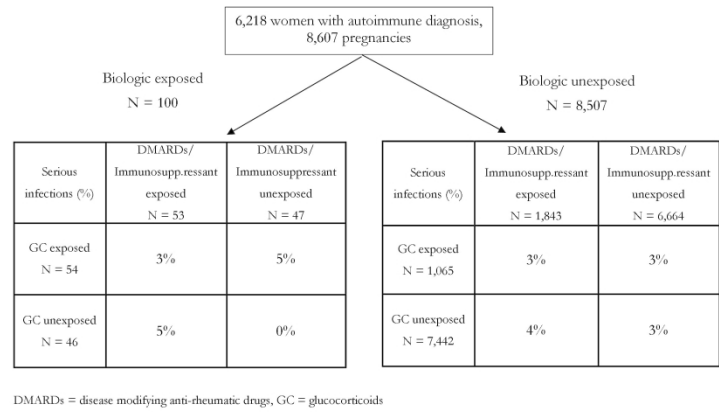

Figure 2. Rates of maternal post-partum serious infections based on drug exposure categories  
279x215mm (300 x 300 DPI)

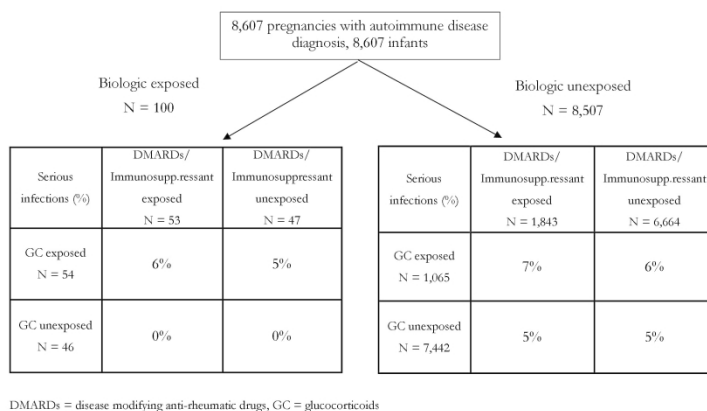

Figure 3. Rates of infant serious infections during the first year of life based on in utero drug exposure categories

279x215mm (300 x 300 DPI)



## Supplementary Materials

**Table S1. List of biologics, disease-modifying agents, immunosuppressive agents, and corticosteroids considered for inclusion**

|                                                |                                                                                                                                                                                                          |
|------------------------------------------------|----------------------------------------------------------------------------------------------------------------------------------------------------------------------------------------------------------|
| Biologics                                      | abatacept, adalimumab, alefacept, anakinra, belimumab, certolizumab pegol, etanercept, golimumab, infliximab, natalizumab, rituximab, tocilizumab, and ustekinumab.                                      |
| Disease-modifying and immunosuppressive agents | 5-aminosalicylic acid, 6-mercaptopurine, apremilast, azathioprine, cyclophosphamide, cyclosporine, hydroxychloroquine, leflunomide, methotrexate, minocycline, mycophenolate mofetil, and sulfasalazine. |
| Corticosteroids*                               | Betamethasone, cortisone, dexamethasone, hydrocortisone, methylprednisolone, prednisone, prednisolone, and triamcinolone.                                                                                |

\* Only systemically administered agents included, excluded if route of administration is topical

**Table S2. Infections and corresponding ICD-9 and -10 codes for outcomes ascertainment**

| Infection types                                                                                                                                                                                                                                                                                                          | ICD-9 Codes                                                             | ICD-10 codes                                                          |
|--------------------------------------------------------------------------------------------------------------------------------------------------------------------------------------------------------------------------------------------------------------------------------------------------------------------------|-------------------------------------------------------------------------|-----------------------------------------------------------------------|
| Respiratory infections (acute respiratory infections, pneumonia, influenza)                                                                                                                                                                                                                                              | 460-466; 480-488                                                        | J00-J06, J09-J18, J20-J22                                             |
| Urogenital infections (cystitis, urethritis [not sexually transmitted], kidney infections, prostatitis, orchitis, epididymitis, vaginitis, other infections originating in the perinatal period)                                                                                                                         | 590, 597, 599, 601.0-601.4, 604, 616.1-616.4, 647, 670, 760.2, 771      | N30, N34, N37.0, N39.0, N41.0, N41.3, N45, N76.0, N76.2, N77, P35-P39 |
| Skin and soft tissue infections (cellulitis, impetigo, herpes virus, varicella zoster virus)                                                                                                                                                                                                                             | 680-686, 053, 054                                                       | L00-L08                                                               |
| Obstetrics-related infections* (infection of amniotic cavity, major puerperal infxn, inflammatory disease of uterus, unspec inflammatory disease of uterus, infxn of GU tract in pregnancy, maternal pyrexia during labour, generalized infxn during labour, pyrexia unknown during puerperium, septicemia, other infxn) | 658.4, 670.0, 615.0, 615.9, 646.6, 659.2, 659.3, 672.0, 038, 999.3, 041 | O41.1, O85.x, O86.x, N71.0, N71.9, O23.x, O75.2, O75.3, A40, A41      |

\*Applied to maternal infections analyses only

## STROBE Statement—checklist of items that should be included in reports of observational studies

|                              | Item No | Recommendation                                                                                                                                                                             | Page numbers                                               |
|------------------------------|---------|--------------------------------------------------------------------------------------------------------------------------------------------------------------------------------------------|------------------------------------------------------------|
| <b>Title and abstract</b>    | 1 ✓     | (a) Indicate the study's design with a commonly used term in the title or the abstract                                                                                                     | Page 1, title                                              |
|                              | ✓       | (b) Provide in the abstract an informative and balanced summary of what was done and what was found                                                                                        | Page 3, abstract                                           |
| <b>Introduction</b>          |         |                                                                                                                                                                                            |                                                            |
| Background/rationale         | 2 ✓     | Explain the scientific background and rationale for the investigation being reported                                                                                                       | Page 6                                                     |
| Objectives                   | 3 ✓     | State specific objectives, including any prespecified hypotheses                                                                                                                           | Page 7, top                                                |
| <b>Methods</b>               |         |                                                                                                                                                                                            |                                                            |
| Study design                 | 4 ✓     | Present key elements of study design early in the paper                                                                                                                                    | Page 3, abstract; Pages 7-10, methods                      |
| Setting                      | 5 ✓     | Describe the setting, locations, and relevant dates, including periods of recruitment, exposure, follow-up, and data collection                                                            | Pages 7, 8, data sources and study cohort                  |
| Participants                 | 6 ✓     | (a) <i>Cohort study</i> —Give the eligibility criteria, and the sources and methods of selection of participants. Describe methods of follow-up                                            | Page 8, study cohort and exposure definition               |
|                              |         | <i>Case-control study</i> —Give the eligibility criteria, and the sources and methods of case ascertainment and control selection. Give the rationale for the choice of cases and controls |                                                            |
|                              |         | <i>Cross-sectional study</i> —Give the eligibility criteria, and the sources and methods of selection of participants                                                                      |                                                            |
|                              |         | (b) <i>Cohort study</i> —For matched studies, give matching criteria and number of exposed and unexposed                                                                                   |                                                            |
|                              |         | <i>Case-control study</i> —For matched studies, give matching criteria and the number of controls per case                                                                                 |                                                            |
|                              |         |                                                                                                                                                                                            |                                                            |
| Variables                    | 7 ✓     | Clearly define all outcomes, exposures, predictors, potential confounders, and effect modifiers. Give diagnostic criteria, if applicable                                                   | Pages 8-10, exposure, outcome and covariates               |
| Data sources/<br>measurement | 8* ✓    | For each variable of interest, give sources of data and details of methods of assessment (measurement). Describe comparability of assessment methods if there is more than one group       | Pages 8-10, exposure, outcome and covariates               |
| Bias                         | 9 ✓     | Describe any efforts to address potential sources of bias                                                                                                                                  | Pages 9, 10, statistical analysis and sensitivity analysis |
| Study size                   | 10      | Explain how the study size was arrived at                                                                                                                                                  |                                                            |
| Quantitative variables       | 11 ✓    | Explain how quantitative variables were handled in the analyses. If applicable, describe which groupings were chosen and why                                                               | Page 9, 10, covariates                                     |
| Statistical methods          | 12 ✓    | (a) Describe all statistical methods, including those used to control for confounding                                                                                                      | Page 10, 11, statistical analysis                          |
|                              |         | (b) Describe any methods used to examine subgroups and interactions                                                                                                                        |                                                            |
|                              |         | (c) Explain how missing data were addressed                                                                                                                                                |                                                            |
|                              |         | (d) <i>Cohort study</i> —If applicable, explain how loss to follow-up was addressed                                                                                                        |                                                            |
|                              |         | <i>Case-control study</i> —If applicable, explain how matching of cases and controls was addressed                                                                                         |                                                            |
|                              |         | <i>Cross-sectional study</i> —If applicable, describe analytical methods taking account of sampling strategy                                                                               |                                                            |
|                              | ✓       | (e) Describe any sensitivity analyses                                                                                                                                                      | Page 10, 11, statistical analysis                          |

Continued on next page

**Results**

|                          |     |                                                                                                                                                                                                                                                                                                                                                                                                               |                                                                                                                       |
|--------------------------|-----|---------------------------------------------------------------------------------------------------------------------------------------------------------------------------------------------------------------------------------------------------------------------------------------------------------------------------------------------------------------------------------------------------------------|-----------------------------------------------------------------------------------------------------------------------|
| Participants             | 13* | (a) Report numbers of individuals at each stage of study—eg numbers potentially eligible, examined for eligibility, confirmed eligible, included in the study, completing follow-up, and analysed<br>(b) Give reasons for non-participation at each stage<br>(c) Consider use of a flow diagram                                                                                                               | Page 11, results; Figures 2 and 3                                                                                     |
| Descriptive data         | 14* | (a) Give characteristics of study participants (eg demographic, clinical, social) and information on exposures and potential confounders<br>(b) Indicate number of participants with missing data for each variable of interest<br>(c) <i>Cohort study</i> —Summarise follow-up time (eg, average and total amount)                                                                                           | Page 11, 12, results; Table 1<br>Page 8, 9, methods (follow up defined in methods, there were no losses to follow up) |
| Outcome data             | 15* | <i>Cohort study</i> —Report numbers of outcome events or summary measures over time<br><i>Case-control study</i> —Report numbers in each exposure category, or summary measures of exposure<br><i>Cross-sectional study</i> —Report numbers of outcome events or summary measures                                                                                                                             | Page 11-13, results; Figures 2 and 3                                                                                  |
| Main results             | 16  | (a) Give unadjusted estimates and, if applicable, confounder-adjusted estimates and their precision (eg, 95% confidence interval). Make clear which confounders were adjusted for and why they were included<br>(b) Report category boundaries when continuous variables were categorized<br>(c) If relevant, consider translating estimates of relative risk into absolute risk for a meaningful time period | Tables 2 and 3<br>Pages 9-10, covariates                                                                              |
| Other analyses           | 17  | Report other analyses done—eg analyses of subgroups and interactions, and sensitivity analyses                                                                                                                                                                                                                                                                                                                | Tables 2 and 3                                                                                                        |
| <b>Discussion</b>        |     |                                                                                                                                                                                                                                                                                                                                                                                                               |                                                                                                                       |
| Key results              | 18  | Summarise key results with reference to study objectives                                                                                                                                                                                                                                                                                                                                                      | Page 13                                                                                                               |
| Limitations              | 19  | Discuss limitations of the study, taking into account sources of potential bias or imprecision. Discuss both direction and magnitude of any potential bias                                                                                                                                                                                                                                                    | Pages 15, 16                                                                                                          |
| Interpretation           | 20  | Give a cautious overall interpretation of results considering objectives, limitations, multiplicity of analyses, results from similar studies, and other relevant evidence                                                                                                                                                                                                                                    | Pages 15, 16                                                                                                          |
| Generalisability         | 21  | Discuss the generalisability (external validity) of the study results                                                                                                                                                                                                                                                                                                                                         | Page 16                                                                                                               |
| <b>Other information</b> |     |                                                                                                                                                                                                                                                                                                                                                                                                               |                                                                                                                       |
| Funding                  | 22  | Give the source of funding and the role of the funders for the present study and, if applicable, for the original study on which the present article is based                                                                                                                                                                                                                                                 | Page 2, end                                                                                                           |

\*Give information separately for cases and controls in case-control studies and, if applicable, for exposed and unexposed groups in cohort and cross-sectional studies.

**Note:** An Explanation and Elaboration article discusses each checklist item and gives methodological background and published examples of transparent reporting. The STROBE checklist is best used in conjunction with this article (freely available on the Web sites of PLoS Medicine at <http://www.plosmedicine.org/>, Annals of Internal Medicine at <http://www.annals.org/>, and Epidemiology at <http://www.epidem.com/>). Information on the STROBE Initiative is available at [www.strobe-statement.org](http://www.strobe-statement.org).
