# Supplementary material for: Use of biologics during pregnancy and risk of serious infections in the mother and baby: a Canadian population-based cohort study
Source: PubMed Central journal article supplement — BMJ Open. 2019 Feb 20;9(2):e023714. doi: 10.1136/bmjopen-2018-023714 (PMC6398640; doi:10.1136/bmjopen-2018-023714), 2019-02-20
Supplement: bmjopen-2018-023714supp001.pdf [file bmjopen-2018-023714supp001.pdf]

## Supplementary Materials

**Table S1. List of biologics, disease-modifying agents, immunosuppressive agents, and corticosteroids considered for inclusion**

|                                                |                                                                                                                                                                                                          |
|------------------------------------------------|----------------------------------------------------------------------------------------------------------------------------------------------------------------------------------------------------------|
| Biologics                                      | abatacept, adalimumab, alefacept, anakinra, belimumab, certolizumab pegol, etanercept, golimumab, infliximab, natalizumab, rituximab, tocilizumab, and ustekinumab.                                      |
| Disease-modifying and immunosuppressive agents | 5-aminosalicylic acid, 6-mercaptopurine, apremilast, azathioprine, cyclophosphamide, cyclosporine, hydroxychloroquine, leflunomide, methotrexate, minocycline, mycophenolate mofetil, and sulfasalazine. |
| Corticosteroids*                               | Betamethasone, cortisone, dexamethasone, hydrocortisone, methylprednisolone, prednisone, prednisolone, and triamcinolone.                                                                                |

\* Only systemically administered agents included, excluded if route of administration is topical

**Table S2. Infections and corresponding ICD-9 and -10 codes for outcomes ascertainment**

| Infection types                                                                                                                                                                                                                                                                                                          | ICD-9 Codes                                                             | ICD-10 codes                                                          |
|--------------------------------------------------------------------------------------------------------------------------------------------------------------------------------------------------------------------------------------------------------------------------------------------------------------------------|-------------------------------------------------------------------------|-----------------------------------------------------------------------|
| Respiratory infections (acute respiratory infections, pneumonia, influenza)                                                                                                                                                                                                                                              | 460-466; 480-488                                                        | J00-J06, J09-J18, J20-J22                                             |
| Urogenital infections (cystitis, urethritis [not sexually transmitted], kidney infections, prostatitis, orchitis, epididymitis, vaginitis, other infections originating in the perinatal period)                                                                                                                         | 590, 597, 599, 601.0-601.4, 604, 616.1-616.4, 647, 670, 760.2, 771      | N30, N34, N37.0, N39.0, N41.0, N41.3, N45, N76.0, N76.2, N77, P35-P39 |
| Skin and soft tissue infections (cellulitis, impetigo, herpes virus, varicella zoster virus)                                                                                                                                                                                                                             | 680-686, 053, 054                                                       | L00-L08                                                               |
| Obstetrics-related infections* (infection of amniotic cavity, major puerperal infxn, inflammatory disease of uterus, unspec inflammatory disease of uterus, infxn of GU tract in pregnancy, maternal pyrexia during labour, generalized infxn during labour, pyrexia unknown during puerperium, septicemia, other infxn) | 658.4, 670.0, 615.0, 615.9, 646.6, 659.2, 659.3, 672.0, 038, 999.3, 041 | O41.1, O85.x, O86.x, N71.0, N71.9, O23.x, O75.2, O75.3, A40, A41      |

\*Applied to maternal infections analyses only
